1 **Title:**

2 Neuroinflammation in neuronopathic Gaucher disease: Role of microglia and NK cells

3 **Authors:**

4  
5 Chandra Sekhar Boddupalli <sup>1\*</sup>, Shiny Nair <sup>1\*</sup>, Glenn Belinsky <sup>1</sup>, Joseph Gans <sup>2</sup>, Erin Teeple <sup>2</sup>,  
6 Tri-Hung Nguyen <sup>2</sup>, Sameet Mehta <sup>3</sup>, Lili Guo <sup>2</sup>, Martin L Kramer <sup>2</sup>, Jiapeng Ruan <sup>1</sup>, Hongge  
7 Wang <sup>2</sup>, Matthew Davison <sup>2</sup>, Vidyadhara D.J <sup>4</sup>, Zhang Bailin <sup>2</sup>, Katherine Klinger <sup>2</sup> and Pramod  
8 K. Mistry<sup>1§</sup>  
9

10 **Affiliations:**

11  
12 Department of Internal Medicine, Yale School of Medicine, New Haven, CT <sup>1</sup>  
13 Translational Sciences, Sanofi, Framingham, MA <sup>2</sup>  
14 Yale Center for Genome Analysis <sup>3</sup>  
15 Department of Neuroscience, Yale School of Medicine<sup>4</sup>  
16

17 \* Joint first authors  
18

19 § Corresponding author:

20 Pramod K. Mistry,  
21 Department of Internal Medicine and Pediatrics,  
22 Yale School of Medicine,  
23 333 Cedar Street, LMP 1080.  
24 New Haven. Connecticut 06520  
25 [Pramod.mistry@yale.edu](mailto:Pramod.mistry@yale.edu)

26 Tel: 203 785 3412, Fax 203 785 7273  
27  
28  
29  
30  
31  
32  
33

34 **Abstract:**

35 **Background:** Neuronopathic Gaucher Disease (nGD) is a rare neurodegenerative disorder caused  
36 by biallelic mutations in *Gba*, and buildup of glycosphingolipids in lysosomes. Neuronal injury  
37 and cell death are prominent pathological features, however the role of *Gba* in individual cell  
38 types and involvement of microglia, blood derived macrophages and immune infiltrates in nGD  
39 pathology remains enigmatic.

40 **Methods:** Here, using single cell resolution of mouse nGD brains, we found induction of  
41 neuroinflammation pathways involving microglia, NK cells, astrocytes, and neurons.

42 **Results:** Targeted rescue of *Gba* in microglia and in neurons, respectively in *Gba* deficient, nGD  
43 mice reversed the buildup of glucosylceramide (GlcCer) and glucosylsphingosine  
44 (GlcSph), concomitant with amelioration of neuroinflammation, reduced level of serum  
45 neurofilament light chain (Nf-L) and improved survival. The levels of bioactive lipid, GlcSph was  
46 strongly correlated with serum Nf-L and ApoE in nGD mouse models as well as GD patients. *Gba*  
47 rescue in microglia/macrophage compartment prolonged survival, that was further enhanced upon  
48 treatment with brain permeant inhibitor of glucosylceramide synthase, effects mediated via  
49 improved glycosphingolipid homeostasis and reversal of neuroinflammation involving activation  
50 of microglia, brain macrophages and NK cells.

51 **Conclusions:** Together, our study delineates individual cellular effects of *Gba* deficiency in nGD  
52 brains, highlighting the central role of neuroinflammation driven by microglia activation and the  
53 role of brain permeant small molecule glucosylceramide inhibitor in reversing complex  
54 multidimensional pathophysiology of nGD. Our findings advance disease biology whilst  
55 identifying compelling biomarkers of nGD to improve patient management, enrich clinical trials  
56 and illuminate therapeutic targets.

57 **Funding:** Research grant from Sanofi Genzyme; other support includes R01NS110354. Yale Liver  
58 Center P30DK034989, pilot project grant.

59

60 **Keywords** *Gba*, microglial dysfunction, neuroinflammation, neurodegeneration,

61 glucosylsphingosine, lipid.

62

63

64

65

66

67

## 68 **Main Text:**

### 69 **Introduction**

70 In Gaucher disease (GD), biallelic mutations in *GBA1* underlie defective acid  $\beta$ -  
71 glucosidase (glucocerebrosidase, GCase) and buildup of the primary substrate, glucosylceramide  
72 (GluCer), and its inflammatory metabolite glucosylsphingosine (GlcSph) in the lysosomes  
73 (Grabowski et al., 2021). GD is broadly classified into three phenotypic types based on the absence  
74 (type 1 GD, GD1) or presence of early onset neurodegeneration (fulminant GD type 2, GD2) and  
75 chronic neurodegeneration (GD3). Adults with GD1 have a markedly increased risk of Parkinson's  
76 disease and Lewy body dementia (PD/LBD) (Bultron et al., 2010; Grabowski et al., 2021).  
77 Moreover, heterozygous carriers of *GBA1* mutations are at an increased risk of PD/LBD (Aharon-  
78 Peretz et al., 2004; Sidransky and Lopez, 2012; Sidransky et al., 2009). Notably, low GCase  
79 activity has been found in the brains of sporadic PD patients who do not harbor *GBA*  
80 mutations (Gegg et al., 2022). Together, *GBA* variants and GCase deficiency are important  
81 determinants of neurodegenerative diseases.

82 Defective lysosomal acid  $\beta$ -glucosidase in GD leads to the build-up of lysosomal GluCer  
83 and GlcSph, lipids which exhibit potent inflammatory and immunogenic activities (Nagata et al.,  
84 2017; Nair et al., 2015; Nair et al., 2016; Pandey et al., 2017). Treatment of non-neuronopathic  
85 GD1, involves enzyme replacement therapy (ERT) targeting macrophage mannose receptors and  
86 substrate reduction therapies (SRT) using inhibitors of glucosylceramide synthase (GCS) (Mistry  
87 et al., 2017a; Mistry et al., 2017b; Platt et al., 2018). However, currently, there are no effective  
88 therapies for the devastating neurodegenerative sequela of *GBA1* mutations. In GD1, SRT is  
89 predicated on the concept that rate of synthesis of GluCer is reduced to match residual enzyme  
90 activity due to *GBA* mutations (Platt et al., 2018). However, in neurodegenerative GD2 and GD3,

91 residual glucocerebrosidase activity is profoundly depressed, due to severe *GBAI* mutations. A  
92 randomized controlled trial of brain penetrant SRT, N-butyldeoxynojirimycin in patients GD3 was  
93 unsuccessful in ameliorating neurological manifestations. However, N-butyldeoxynojirimycin is  
94 relatively weak inhibitor of GCS with even more potent inhibitory off-target effects (Schiffmann  
95 et al., 2008). Using a more specific and potent GCS inhibitor in chemically induced model of nGD,  
96 some disease pathways were ameliorated on bulk RNA analysis, had no effects on inflammatory  
97 pathways (Blumenreich et al., 2021).

98         Microglia are specialized, self-renewing, CNS-resident macrophages that represent the  
99 dominant immune cells involved in maintaining CNS homeostasis in cooperation with other CNS  
100 cell types such as neurons, astrocytes, and oligodendrocytes. Emerging data from single-cell  
101 analysis and GWAS studies of several neurodegenerative diseases have revealed central role of  
102 microglia in neurodegeneration (Chen and Colonna, 2021). Although several mechanisms have  
103 been proposed to explain *GBAI*- associated neurodegenerative phenotype, most of the studies in  
104 GD have focused on the *GBAI* deficit in neurons, while contribution of other brain cell types in  
105 driving the disease pathology has been considered minimal. While there has been  
106 immunohistochemical evidence that microglia are altered in neuronopathic GD, few studies have  
107 focused on the effect of *GBAI* deficiency *per se* on microglia. Further, studies are warranted to  
108 investigate the immune landscape of nGD to clearly delineate therapeutic targets

109         Hitherto, studies aimed at understanding the mechanisms of neuroinflammation in  
110 neurodegeneration due to *GBA* deficiency have solely relied on bulk cell population analysis,  
111 which have hindered the delineation of heterogeneity and complexity of the immune milieu within  
112 the brain as well as role of *GBAI* in individual cell types of the brain. Here, we applied an  
113 integrated approach by generating novel mice models, lipidomic analyses, scRNA-seq of immune

114 cells, and brain snRNA-seq to delineate temporospatial components of *GBA1*-associated  
115 neuroinflammation, including immune cell subsets, activated pathways, as well as probe  
116 therapeutic targets and discover novel biomarkers. Importantly, we used both early onset  
117 neuronopathic GD mice *Gba*<sup>lnl/lnl</sup> (loxP-Neo-loxP) mice, with a germ-line deletion of *Gba*  
118 (henceforth referred to as nGD mice) which phenocopies human GD2, fulminant neuronopathic  
119 GD (Enquist et al., 2007) as well as a new mouse model of microglia-specific *Gba* deletion in  
120 *Gba*-floxed mice that mimics the late- onset progression seen commonly in GD patients. To  
121 understand the function of *Gba* in microglial and neuronal homeostasis and disease progression  
122 we also developed two additional new nGD mouse models with microglia and neuron specific  
123 rescue of *Gba*.

124 We evaluated brain-penetrant inhibitor of GCS as a therapeutic strategy in both early and  
125 late onset nGD models to assess its impact on reducing cellular glycosphingolipids, individual  
126 components of neuroinflammation and neurodegeneration while elucidating temporospatial  
127 cellular events. Our findings define a previously unreported role of glycosphingolipid-laden  
128 microglia and macrophages along with NK cells and astrocytes in *Gba*-associated  
129 neurodegeneration while also revealing novel biomarkers and therapeutic targets.

## 130 **Results**

### 131 **Glycosphingolipid-laden microglial activation and immune cell infiltration drive GD** 132 **associated neurodegeneration**

133 We performed longitudinal temporospatial analysis of brain in nGD mice (*Gba*<sup>lnl/lnl</sup> mice with  
134 germ-line deletion of *Gba*, rescued from lethal skin phenotype using K14 Cre), compared to  
135 control mice (*Gba*<sup>lnl/wt</sup> and *Gba*<sup>wt/wt</sup>) on days 2, 4, 8, 10, and 14. nGD mice looked clinically well  
136 during the first week and subsequently developed progressive ataxia, weight loss, and hind limb

137 paralysis, by day 14, as described previously (Enquist et al., 2007). Microglia and macrophage  
138 subsets in brain were defined by combinatorial expression of CD11b, CD45, T cell  
139 immunoglobulin and mucin domain containing 4 (TIMD4) and the chemokine receptor C-C motif  
140 chemokine receptor 2 (CCR2). Brain microglia have self-renewal capacity with minimal  
141 monocyte input in contrast to CCR2<sup>+</sup> macrophages which have limited self-renewal capacity and  
142 are constantly replaced by monocytes (Dick et al., 2022). Infiltration of CCR2<sup>+</sup> MFs defined as  
143 CD11b<sup>hi</sup>CD45<sup>+</sup>CCR2<sup>+</sup>CD64<sup>+</sup>TIMD4<sup>-</sup> population (fig. S1A) were noted in the nGD brain from an  
144 early time point day 2, which showed a steady increase until day 14 when the mice reached the  
145 humane endpoint (Fig. 1A). Concurrently, there was attrition of homeostatic microglia and  
146 incremental infiltration of diverse immune cells into nGD brains, which coincided with mice  
147 displaying clear signs of neurodegeneration (Fig. 1A and B and fig. S1A). The predominant  
148 immune cells in healthy mouse brains were homeostatic microglia, as expected, whereas in nGD  
149 brains, the repertoire of immune cells comprised diverse lymphoid (T cells, NK cells, ILC-2, pDC),  
150 and myeloid compartment (cDC, monocytes and/or macrophages) (fig. S1B). To investigate the  
151 metabolic consequences of *Gba* deletion in microglia and infiltrating immune cells, we performed  
152 HPLC/MS/MS on flow-sorted microglia and infiltrating immune cells. Microglia from nGD brains  
153 harbored elevated levels of GluCer species (C16, C18, and C20) as well as GlcSph (fig. S1C).  
154 Notably, the immune cell infiltrates in the nGD brains were also enriched in glucosylceramides  
155 (C16 and C18) (fig. S1C).

156 For *de novo* characterization of the brain immune cell microenvironment, sorted CD45<sup>+</sup>  
157 cells from nGD and control brains were analyzed by scRNA-seq and tSNE analysis revealed 15  
158 distinct cellular clusters of CD45<sup>+</sup> cells (numbered 0-14) (Fig. 1C), which were assigned to  
159 individual immune subsets based on the expression of known marker genes (Fig. 1C and fig. S1D

160 and E). There were major alterations in the immune cell composition in nGD brains, which was  
161 qualitatively and quantitatively dominated by various lymphocyte populations (T cells,  $\gamma\delta$ T cells,  
162 Treg cells, NK cells, and ILC-2), pDC, and a heterogenous myeloid compartment (cDC,  
163 monocytes/macrophages and granulocytes) (Fig. 1C and fig. S1D). Homeostatic microglia were  
164 reduced in nGD brains, consistent with impaired microglial homeostasis in nGD pathology (fig.  
165 S1A and D). Interestingly, the B cell population (cluster 4) appeared more pronounced in nGD  
166 brains, although it was also present in controls. The microglia and immune cell infiltrates in nGD  
167 brains exhibited a striking upregulation of type 1-interferon signature genes (ISG) (Fig. 1D). Total  
168 RNA-seq analysis performed on flow-sorted microglia from nGD and control mice revealed  
169 distinct gene expression profiles in GluCer/GlcSph-laden nGD microglia vs. control microglia (fig.  
170 S2A). Microglia of nGD mice exhibited clear downregulation of homeostatic genes and  
171 concomitant upregulation of disease-associated microglia (DAM) signature genes, in addition to  
172 upregulation of ISGs (fig. S2B and C). Together, these findings establish GluCer/GlcSph-laden  
173 DAM, and peripheral immune cell infiltration as key features of nGD neuropathology.

#### 174 ***Gba* restoration in microglia and neurons prolong survival of nGD mice**

175 To dissect the contribution of microglia and neurons nGD neurodegeneration, we generated nGD  
176 Cx3cr1<sup>Cre/+</sup> and nGD Nes<sup>Cre/+</sup> mice for selective rescue of *Gba* in microglia and neurons,  
177 respectively (Fig. 2A and fig. S3A). Unless otherwise stated, we used littermate *Gba*<sup>wt/wt</sup> with the  
178 respective Cre recombinases as controls. Notably, restoration of *Gba* in microglia (nGD  
179 Cx3cr1<sup>Cre/+</sup> mice) led to more than 2-fold increase in survival compared to nGD mice (Fig. 2B).  
180 Selective restoration of *Gba* in neurons (nGD Nes<sup>Cre/+</sup> mice), further enhanced the survival up to  
181 ~200 days where they reached the humane endpoint (Fig. 2B). To assess the alterations in  
182 microglia and macrophage phenotypes associated with targeting of *Gba* in microglia/ neurons, we

183 compared the brains of nGD, nGD Cx3cr1<sup>Cre/+</sup>, and nGD Nes<sup>Cre/+</sup> mice. Restoration of *Gba* in  
184 microglia of nGD mice (nGD Cx3cr1<sup>Cre/+</sup>) resulted in increased homeostatic microglia with  
185 reduction in CCR2<sup>+</sup> MFs and peripheral immune cell infiltration compared to nGD brains (Fig. 2C  
186 and fig. S3B). In contrast, restoration of *Gba* in neurons of nGD mice (nGD Nes<sup>Cre/+</sup>) blocked  
187 attrition of microglia as well as the infiltration of CCR2<sup>+</sup> MFs and peripheral immune cells (Fig.  
188 2C). Correspondingly, induction of intracellular Pro-IL-1 $\beta$  in microglia, an indicator of microglial  
189 activation, was observed in both nGD and nGD Cx3cr1<sup>Cre/+</sup> brains (Fig 2 D, and E) but not in nGD  
190 Nes<sup>Cre/+</sup> brains (Fig. 2 D and F; fig. S3C). Collectively, these data establish the critical role of *Gba*  
191 deficiency in neurons in aiding vigorous microglial activation and immune cell infiltration in nGD  
192 and nGD Cx3cr1<sup>Cre/+</sup> brains. Consistent with this notion, compared to nGD mice, both nGD  
193 Cx3cr1<sup>Cre/+</sup> mice and nGD Nes<sup>Cre/+</sup> mice also showed significant reduction of brain  
194 glucosylceramides (by  $\geq 90\%$  for C16 and C18:1, and by 50-70% for C18, C20:1, C22, C22.1,  
195 C24, and C24:1, and by 38% for C20 glucosylceramide) with a concomitant, striking reduction of  
196 GlcSph (89% and 98% ) respectively (Fig. 2G and fig. S4A). As expected, there was no change in  
197 the levels of galactosylceramide (GalCer) species or galactosylsphingosine (GalSph) in nGD  
198 brains (fig. S4B). MALDI imaging of frozen brain sagittal sections was performed to assess the  
199 topography of GSL accumulation. Elevated levels of numerous hexosylceramides (HexCers) were  
200 detected in nGD brains. Of these, HexCer (18:1/22:0) exhibited higher signal intensity in the  
201 cerebral cortex and midbrain region of nGD Cx3cr1<sup>Cre/+</sup> brains compared to control mice (fig.  
202 S4C). Similarly, HexCer (18:1/20:0) species was elevated in the same brain regions of nGD  
203 Nes<sup>Cre/+</sup> mice (fig. S4D). Interestingly, a co-regulated lipid in GD cells models,  
204 lysophosphatidylcholine (LysoPC) (Bodennec et al., 2002), showed striking accumulation in the  
205 cerebral cortex and midbrain region of nGD Cx3cr1<sup>Cre/+</sup> and nGD Nes<sup>Cre/+</sup> mice (fig. S4C and D



206 lower panel). Assessment of motor balance and coordination showed that the longer-lived adult  
207 nGD Nes<sup>Cre/+</sup> (4-6 months) mice were unable to complete the balance beam runs with an average  
208 time > 60 s (fig. S4E). Notably, there were unusual repetitive circling body movements (fig. S4F).  
209 These features appear to phenocopy behavioral disorders reported in human GD3 (Abdelwahab et  
210 al., 2017). Taken together, these results indicate the differential role of *Gba* in individual cell types  
211 in the brain. Notably, reconstituting *Gba* in microglia of nGD mice affords an impressive capacity  
212 to offset toxic lipid accumulation in the brain and significantly prolong survival.

### 213 **Selective deletion of *Gba* in microglia results late onset neurodegeneration**

214 To further establish the role of *Gba* in microglia, we used our *Gba* floxed mice (Mistry et al., 2010)  
215 for microglia-specific *Gba* deletion using Cx3cr1-Cre (Yona et al., 2013) (*Gba*<sup>loxp/loxp</sup> Cx3cr1<sup>Cre/+</sup>)  
216 (fig. S5A). We investigated this mouse strain for clinical phenotype, brain GluCer/GlcSph  
217 accumulation, neuroinflammation, and whether microglia/macrophages underwent compensatory  
218 recycling in the setting of microglia-specific *Gba* deficiency. Remarkably, *Gba*<sup>loxp/loxp</sup> Cx3cr1<sup>Cre/+</sup>  
219 brains showed a pronounced accumulation of GlcSph and several GluCer species (C16, C18, C20,  
220 and C22 GluCer species) compared to control brains (Fig. 3A). There was no change in the levels  
221 of GalCer or GalSph species (fig. S5B). Young mice appeared healthy despite accumulation of  
222 GluCer/GlcSph in the brain, but aged *Gba*<sup>loxp/loxp</sup> Cx3cr1<sup>Cre/+</sup> mice (~ 12 months old) started to  
223 exhibit motor deficits manifested by a longer time to complete the beam walk and increased  
224 tendency to slip (data not shown). HPLC-MS/MS analysis revealed elevated levels of GlcSph in  
225 the sera of young *Gba*<sup>loxp/loxp</sup> Cx3cr1<sup>Cre/+</sup> mice (6-8 weeks), which tended to increase further in  
226 aged (14 months) mice compared to healthy controls (Fig. 3B). Congruently, there was a  
227 significant reduction in microglia and increase in CCR2<sup>+</sup> MFs and immune cell infiltration in aged  
228 *Gba*<sup>loxp/loxp</sup> Cx3cr1<sup>Cre/+</sup> mice, while no changes were observed in young *Gba*<sup>loxp/loxp</sup> Cx3cr1<sup>Cre/+</sup>

229 mice (Fig. 3C). We attributed increase of infiltrating CCR2<sup>+</sup> MFs in aged *Gba*<sup>loxp/loxp</sup> Cx3cr1<sup>Cre/+</sup>  
230 mice brain compared to young mice to higher turnover rate as seen by BrdU uptake assay (fig.  
231 S5C and D). In contrast to nGD mice with florid neuroinflammation, we could not detect Pro IL-  
232 1 $\beta$  induction in microglia of *Gba*<sup>loxp/loxp</sup> Cx3cr1<sup>Cre/+</sup> mice (fig. S5E). We isolated FACS-sorted  
233 microglia from young and aged *Gba*<sup>loxp/loxp</sup> Cx3cr1<sup>Cre/+</sup> brains to perform scRNAseq. A total of  
234 2,302 microglial cells single-cell transcriptomes were subjected to Louvain clustering, resulting in  
235 9 transcriptionally distinct microglial states (Fig. 3D). The proportion of individual microglial  
236 clusters were differentially enriched in young vs aged mice brain (Fig. 3E). Taking advantage of  
237 the single-cell resolution of our data and published microglia-specific lineage genes (Chen and  
238 Colonna, 2021; Chen et al., 2021; Wang et al., 2020), we identified homeostatic microglial clusters  
239 (0, 2, 3, and 6), DAM clusters (1 and 4), a hitherto undescribed *Gba* locus associated gene cluster  
240 (cluster 5, we refer to it as *Gba* cluster because *Mtx1* and *Thbs3* are contiguous with *the Gba* gene)  
241 and ISG cluster (cluster 7) (Fig. 3E and F). In young *Gba*<sup>loxp/loxp</sup> Cx3cr1<sup>Cre/+</sup> mice, homeostatic  
242 microglia represented by clusters 0, 2, 3, and 6 were the predominant microglia population (Fig.  
243 3F). Notably, in aged *Gba*<sup>loxp/loxp</sup> Cx3cr1<sup>Cre/+</sup> brains, DAM signature clusters (1 and 4), along with  
244 *the Gba* locus associated gene cluster (cluster 5) and interferon-induced gene cluster (cluster 7)  
245 represented the major microglial populations (Fig. 3F). Therefore, with aging transition of  
246 homeostatic microglia (cluster 2) into DAM microglia cluster with higher expression of DAM  
247 genes (*ApoE*, *Spp1*, *Lpl*, *Ccl3*, and *Cst7*) and lower levels of homeostasis genes (*P2ry12* and  
248 *Tmem119*) was evident (Fig. 3E). Aged *Gba*<sup>loxp/loxp</sup> Cx3cr1<sup>Cre/+</sup> microglia also expressed higher  
249 levels of chemokines (*Ccl3*, *Ccl4*, *Ccl2*, etc.), inflammatory molecules (*Tnf*, *Il1a*, and *Il1b*), and  
250 key DAM signature genes (*ApoE*, *Spp1*, *Lpl*, *Ccl3*, and *Cst7*) (Fig. 3G). Notably, CCL2/CCR2  
251 interaction mediates the recruitment of CCR2 bearing leukocytes in the brain in several

252 neuroinflammatory diseases (Mahad et al., 2006). Given this context, aged *Gba*<sup>loxp/loxp</sup> *Cx3cr1*<sup>Cre/+</sup>  
253 mice microglia displaying higher expression of *Ccl2* and other inflammatory chemokines likely  
254 mediates infiltration of peripheral *CCR2*<sup>+</sup> MFs and leukocytes contributing to neuroinflammation  
255 seen in our late onset neurodegeneration model, akin to late onset neuroinflammation seen in some  
256 GD patients with aging (Belarbi et al., 2020). Interestingly, expression of *Mtx1* and *Thbs3* genes  
257 that are assigned to chromosome 1q21 contiguous with *Gba*, was enriched in cluster 5, and were  
258 enriched in aged *Gba*<sup>loxp/loxp</sup> *Cx3cr1* microglia (we have termed these *Gba*-associated genes). The  
259 expression of IFN response genes in microglia cluster 7 remained unchanged between young and  
260 aged mice (Fig. 3E). Taken together, molecular elucidation of aged *Gba*-deficient microglia shows  
261 a loss of homeostatic signature with pronounced expression of inflammatory signaling molecules.  
262 Thus, our findings highlight the important role of *Gba* in long-term maintenance of microglial  
263 homeostasis and implicates *GBA* deficient microglia in development of age-related  
264 neurodegenerative disease like PD that occurs with high risk in adults with GD1.

### 265 **NK cells together with microglial activation drives neuropathology in nGD brains**

266 In the characterization of immune cell infiltrates by scRNA seq in the brains of nGD and nGD  
267 *Cx3cr1*<sup>Cre/+</sup> mice, we found evidence of infiltration of NK cells (fig. S1B and E). We confirmed  
268 striking NK infiltration in nGD brains by flow cytometry (Fig. 4 A, B, and C). Brain infiltrating  
269 NK cells expressed granzyme A (*GzmA*) (Fig 4 D, E, and F). NK cell frequency or *GzmA*  
270 expression was unaltered in the spleens of both nGD and nGD *Cx3cr1*<sup>Cre/+</sup> mice (fig. S6A, Fig. 4G  
271 and H), implying that the primary cues responsible for activation of NK cells were emanating from  
272 within the nGD brains. Sphingosine 1-phosphate (Sph-1P) plays a key role in NK cell trafficking  
273 via its receptor S1P5 (Walzer et al., 2007). To address whether Sph-1P is involved in NK cell  
274 infiltration in nGD brain, we performed HPLC-MS/MS analysis of brain tissue for sphingosine

275 species. We found no specific buildup of sphingosine lipid species including Sph-1P in nGD and  
276 nGD Cx3cr1<sup>Cre/+</sup> mice brains compared to the control mice (fig. S6B), suggesting that other  
277 mechanism(s) may underlie NK cell infiltration or that there is local generation of S1P that is  
278 beyond the resolution of HPLC-MS/MS.

279 To assess whether the pattern of neuroinflammation observed in genetic models of nGD could be  
280 replicated in another system, we used a chemically induced model of nGD using an inhibitor of  
281 acid  $\beta$ -glucosidase (conduritol  $\beta$ -epoxide, CBE). Administration of CBE in WT mice resulted in  
282 the nGD phenotype, as described previously (Farfel-Becker et al., 2011; Kanfer et al., 1982).  
283 FACS analysis of immune cells in the brains of CBE-treated mice revealed major infiltration of  
284 immune cells (fig. S6C and Fig. 4I) as well as Pro-IL-1 $\beta$  induction in the microglia (Fig. 4J). Like  
285 genetic models, immune cell phenotyping in the brains of CBE-treated mice showed striking  
286 induction of GzmA<sup>+</sup> NK cells (fig. S6C and Fig. 4K and L). Therefore, using genetic and  
287 chemically induced nGD mouse models, we confirmed a conserved immune landscape of nGD  
288 brains comprising prominent NK cell infiltration and microglial activation.

### 289 **Single cell resolution revealed role of microglial *Gba* in delaying neuroinflammation**

290 To gain a comprehensive and dynamic overview of the underlying mechanisms involved in the  
291 longitudinal course of GD associated neurodegeneration, we performed brain single-nucleus  
292 RNA-seq to elucidate cell types/pathways involved in (1) the acute neuropathic model nGD mice  
293 at 2wks, (2) after restoration of *Gba* in microglia (nGD Cx3cr1<sup>Cre/+</sup>) both at early (2 wks) and late  
294 stage (6 wks) when it displays overt neurodegenerative phenotype, and (3) late onset model, nGD  
295 Nes<sup>Cre/+</sup> brains with rescue of *Gba* in neuronal compartment (~7mo). Integrated hierarchical  
296 analysis with quality controls (fig. S7A), revealed 61 distinct cell clusters that were annotated for  
297 major cell types based on the differential expression of canonical marker genes (Fig. 5A and fig.

298 S7B). We focused on four distinct gene sets: lysosomal biology, ISGs, chemokines, and ApoE.  
299 Lipid metabolism genes are known to be upregulated in DAMs. We focused on ApoE because of  
300 its established roles in both lipid transport and neurodegeneration highlighted by GD (Serrano-  
301 Pozo et al., 2021). AUCell analysis was applied to interrogate these gene set enrichments and  
302 stratify different cell types: Lysosomal biology (*Abca2, Ap1b1, Ap3s1, Ap4s1, Atp6v0a1, Atp6v1h,*  
303 *Cd63, Cd68, Cln3, Ctsb, Ctsd, Ctsl, Ctss, Galc, Galns, Hexa, Hexb, Lamp, Psap, Slc17a5, Sumf1,*  
304 *Gpr37, Gpr37l1, Mtx1 and Thbs3*), Interferon Signaling Genes (*Psmb10, Psmb9, Psmb8, Psma4,*  
305 *Psme2, Oas1a, Oasl2, Oasl1, Isg15, Ifi207, Ifi47, Ifit1, Ifi213, Ifitm3, Ifit3, Ifi35, Epsti1, Parp14,*  
306 *Bst2, Irf7, Irf9, Stat1, Stat2, Usp18, Ifit2, Slfn5 and Ifih1*), Chemokine genes (*Cxcl10, Cxcl12,*  
307 *Ccl5, Cxcl5, Ccl2, Ccl3 and Ccl7*) and ApoE. In the brains of nGD and 6-week-old nGD  
308 Cx3cr1<sup>Cre/+</sup> mice both with overt neurodegenerative phenotypes, lysosomal biology, ISG, and  
309 ApoE genes were highly upregulated in microglia, Purkinje, oligodendrocytes (clusters 2, 34, and  
310 36), astrocytes (clusters 22, 23, 4, 48, 52, and 9), and neurons (0, 3, 5, and 6) (Fig. 5B). In contrast,  
311 microglia of 2-week-old nGD Cx3cr1<sup>Cre/+</sup> mice were similar to controls. In line with these  
312 observations, DAM markers were significantly enriched in microglia from both nGD and 6-week-  
313 old nGD Cx3cr1<sup>Cre/+</sup> compared to 2-week-old nGD Cx3cr1<sup>Cre/+</sup> mice (fig. S7C), consolidating the  
314 importance of microglial *Gba* in ameliorating neurodegeneration seen in florid acute  
315 neuroinflammation. Importantly, the results suggest that even in setting of normal microglia *Gba*  
316 in nGD Cx3cr1<sup>Cre/+</sup> mice, increased flux of glucosylceramide lipids arising from *Gba* deficient  
317 neuronal cells lead to DAM, over time as seen at 6 weeks but not at 2 weeks in these mice. *Gba*  
318 rescue in the neuronal compartment resulted in the normalization of pathways associated with  
319 lysosomal biology genes, ISG genes, chemokine genes, and ApoE in microglia, Purkinje,  
320 oligodendrocytes, astrocytes, and neuron cell clusters, and in other brain cell clusters (Fig. 5B).

321 Nevertheless, lower expression of homeostatic microglia markers was observed in nGD Nes<sup>Cre/+</sup>  
322 microglia as compared to control mice (fig. S7D).

323 Gene expression analysis revealed that nGD mice exhibited the largest number of differentially  
324 expressed genes (DEGs) (n = 19,274), which were strikingly reduced in 2-week-old nGD  
325 Cx3cr1<sup>Cre/+</sup> (n=125) and also in nGD Nes<sup>Cre/+</sup> brains, n=256 (Fig. 5C). Consistent with the  
326 neuroinflammation observed in 6-week-old nGD Cx3cr1<sup>Cre/+</sup> mice, elevated DEGs in neuronal  
327 clusters were seen (n=7539) compared to 2-week-old nGD Cx3cr1<sup>Cre/+</sup> mice (n=125) (Fig. 5C).  
328 However, 6-week-old nGD Cx3cr1<sup>Cre/+</sup> mice show a reduction of DEGs in different neuronal  
329 clusters as compared to nGD mice (Fig. 5D). Collectively, these results indicate the underlying  
330 role of microglial *Gba* in safeguarding and delaying neuroinflammatory gene networks in nGD  
331 brains.

332 We found evidence of significant activation of severe disease pathways in astrocytes (Fig. 5B).  
333 Astrocytosis has been described in immunohistochemistry of mouse and human neuronopathic  
334 brains (Wong et al., 2004). We analyzed the astrocyte compartment for the disease-associated  
335 astrocyte (DAA) gene signature (Batiuk et al., 2020; Habib et al., 2020). DAA genes were highly  
336 induced in astrocyte clusters from nGD mice and in 6-week-old nGD Cx3cr1<sup>Cre/+</sup> mice but not in  
337 2-week-old nGD Cx3cr1<sup>Cre/+</sup> mice (Fig. 5E). IPA analysis was performed on neurons, astrocytes,  
338 and microglia. IPA revealed enrichment of necroptosis, interferon, IL8, TREM1, and  
339 neuroinflammation signaling pathways in 2-week-old nGD mice compared to the controls. *Gba*  
340 rescue in microglia of 2-week-old nGD Cx3cr1<sup>Cre/+</sup> mice showed abrogation of neuroinflammatory  
341 pathways seen in nGD brains (Fig. 5F). Between 2 and 6 weeks, as neurodegeneration advanced  
342 in nGD Cx3cr1<sup>Cre/+</sup> mice, the enrichment of inflammatory pathways was again evident (Fig. 5F).  
343 Notably, both interferon and NK cell signaling pathways were upregulated in 2-week-old nGD

344 and in 6-week-old nGD Cx3cr1<sup>Cre/+</sup> brains (Fig. 5F). Consistent with the lack of microglial  
345 activation and NK infiltration in nGD Nes<sup>Cre/+</sup> mice, IPA pathway analysis revealed no changes in  
346 neurons, astrocytes, and microglia in nGD Nes<sup>Cre/+</sup> mice (Fig. 5F). Pathway analysis of  
347 differentially expressed genes revealed that the ‘production of nitric oxide and ROS’ was elevated  
348 in nGD and 6-week-old nGD Cx3cr1<sup>Cre/+</sup> microglia and astrocytes along with neuroinflammation  
349 pathways. Elevated and dysregulated reactive oxygen species (ROS) production from DAM  
350 contributes to oxidative stress and has been shown to be intricately linked with neurodegeneration  
351 (Mendiola et al., 2020; Simpson and Oliver, 2020). Consistent with the transcriptional changes  
352 observed in nGD mice, astrocytes from nGD mice showed higher fluorescence after treatment with  
353 CellROX, indicating a higher level of ROS, as compared to astrocytes from control mice (Fig.  
354 5G). nGD astrocytes with high ROS level also showed elevated accumulation of neutral lipids, as  
355 seen by BODIPY staining (Fig. 5H). Moreover, activated microglia in the nGD brain showed  
356 enhanced ROS level along with an increased accumulation of lipids compared to homeostatic  
357 microglia (Fig. 5I and J). Overall, these observations suggest that *Gba-deficient* neurons and  
358 microglia play key roles in orchestrating neuroinflammation involving astrocytes and NK cells  
359 that underlie neurodegeneration in neuronopathic GD.

### 360 **GCS inhibitor reduces GluCer/GlcSph and reverses microglia and NK cell activation**

361 Collectively our findings suggest that restoring lipid dyshomeostasis and neurodegeneration  
362 caused by *Gba* deficiency in microglia and neurons can be prevented by restoration of *Gba*.  
363 Previous studies have shown that treatment with GCS inhibitor GZ-161 reduced GluCer and  
364 GlcSph in the brains of nGD mice and prolonged survival by a few days (Cabrera-Salazar et al.,  
365 2012) (fig. S8A). To determine whether reduction of glucosylceramide lipids by GZ-161 alleviates  
366 neuroinflammatory landscape and neurodegeneration, we treated our mouse models with this

367 brain permeant GCS inhibitor. Consistent with previous studies, GZ-161 treatment significantly  
368 prolonged the survival of nGD mice (Fig. 6A). We investigated whether GZ-161 treatment could  
369 further extend the survival of nGD Cx3cr1<sup>Cre/+</sup> mice by more effective reduction of brain  
370 GluCer/GlcSph via dual effect of decreased synthesis of GluCer and increased lysosomal  
371 degradation of GluCer in microglia. Indeed, GZ-161 treatment of nGD Cx3cr1<sup>Cre/+</sup> mice resulted  
372 in considerable extension of survival compared to untreated mice, with analogous normalization  
373 of GlcSph levels in the sera of treated nGD Cx3cr1<sup>Cre/+</sup> mice (Fig. 6A and B).

374 Next, we assessed the impact of pharmacologic reduction of GluCer/GlcSph on disease-specific,  
375 microglial and macrophage phenotypes associated with neuroinflammation in GD mice models.  
376 FACS analysis of GZ-161-treated nGD mice showed that the GCS inhibitor significantly reduced  
377 the proportion of CCR2<sup>+</sup> MFs, concomitantly restoring homeostatic microglia compartment (Fig.  
378 6C and D). However, GZ-161 treatment had no effect on immune cell infiltrates in the brains of  
379 nGD mice (Fig. 6C and D). GZ-161 treatment showed a non-significant downward trend in  
380 microglial Pro-IL-1 $\beta$  induction in nGD mice (Fig. 6E). GZ-161 treatment in longer-lived nGD  
381 Cx3cr1<sup>Cre/+</sup> mice wherein drug administration was more reliable resulted in significantly increased  
382 survival (Fig. 6A) accompanied by a reduction in Pro-IL-1 $\beta$ <sup>+</sup> microglia as well as a reduction in  
383 GzmA<sup>+</sup> immune cells in the brain (fig. S8B, Fig. 6F and G). We further evaluated the ability of  
384 GZ-161 to counteract NK cell induction seen in the CBE model. Administration of GZ-161 in  
385 CBE-treated mice reduced infiltration of NK cells in the brain (Fig. 6H). Together, these results  
386 show that GZ-161 can mitigate the metabolic defect caused by *Gba* deficiency by reducing the  
387 toxic accumulation of GluCer and GlcSph, concurrent with alleviating CNS immune inflammation  
388 involving microglia and NK cell activation. Moreover, when microglia are predominantly of  
389 homeostatic phenotype through complementation of *Gba* function in nGD mice, a two-pronged



390 approach of restoring *Gba* in microglia and GCS inhibitor, the influx of NK cells into the brain  
391 and subsequent neurodegeneration is significantly constrained.

### 392 **GCS inhibition counteracts age-related microglial dysfunction and NK cell activation**

393 We investigated whether buildup of GlcCer and GlcSph is proximate cause of neuroinflammation  
394 and neurodegeneration in *Gba* deficiency using the brain permeant GCS inhibitor in late onset  
395 neurodegeneration *Gba*<sup>loxp/loxp</sup> Cx3cr1<sup>Cre/+</sup> model. The effect of reversing the toxic accumulation  
396 of GluCer/GlcSph on *in vivo* microglial homeostasis and NK cell activation was assessed by  
397 feeding *Gba*<sup>loxp/loxp</sup> control mice and *Gba*<sup>loxp/loxp</sup> Cx3cr1<sup>Cre/+</sup> mice with either control or GZ-161-  
398 formulated diet, starting at age 3-months, for 7 months. The effect of GZ-161 on GSL  
399 accumulation in brain regions was evaluated using MALDI imaging. *Gba*<sup>loxp/loxp</sup> Cx3cr1<sup>Cre/+</sup> mice  
400 accumulated HexCer (d18:1/18:0) and HexCer (d18:1/20:0) in the corpus callosum (Fig. 7A),  
401 which was normalized upon GZ-161 diet. Concomitantly, there was a reduction in HexCer  
402 (18:1/22:0) accumulation in the cerebral cortex (Fig. 7A). Interestingly, as previously stated,  
403 LysoPC was present with an exceptionally strong signal in the microglia in the cerebral cortex and  
404 midbrain regions of untreated *Gba*<sup>loxp/loxp</sup> Cx3cr1<sup>Cre/+</sup> mice. Intensity of LysoPC accumulation in  
405 brain microglia was significantly reduced by GZ-161 treatment.

406 We performed scRNA-seq of CD45<sup>+</sup> cells from brains of *Gba*<sup>loxp/loxp</sup> Cx3cr1<sup>Cre/+</sup> mice and control  
407 mice on control or GZ-161- formulated diet. A total of 40,763 CD45<sup>+</sup> single-cell transcriptomes  
408 were subjected to unsupervised Louvain clustering resulting in a total of 28 transcriptionally  
409 distinct populations comprising 10 broad cell types (Fig. 7B). Clusters 1, 26, and 16 represented  
410 microglia (4,230 cells) and were visualized on UMAP, revealing 15 unique clusters (Fig. 7B, lower  
411 panel). We identified clusters 0, 1, and 5 as homeostatic microglia, cluster 2 as DAM, and cluster  
412 7 as *Gba*-associated microglia (Fig. 7C). DAM cluster 2, which was significantly enriched in

413 *Gba*<sup>loxp/loxp</sup> Cx3cr1<sup>Cre/+</sup> brains was markedly reduced in *Gba*<sup>loxp/loxp</sup> Cx3cr1<sup>Cre/+</sup> mice fed with GZ-  
414 161 diet with concurrent enhancement of homeostatic microglia clusters 0 and 1 (Fig. 7D). We  
415 found that *Gba-associated* gene cluster 7 was present exclusively in *Gba*<sup>loxp/loxp</sup> Cx3cr1<sup>Cre/+</sup> mice  
416 both on GZ-161 and on the control diet groups. To assess the effect of GZ-161 on NK cells within  
417 the brain environment, we further analyzed cluster 17, which represented NK cells (fig. S9A). GZ-  
418 161 treatment resulted in a reduction of *Gzma*, *Ccl5*, *Tyrobp*, and *Klf2*, with no change in *Klrkl*,  
419 *Klrkl*, *CD52*, and *Ccl4* (Fig. 7E). Collectively, these results demonstrate that GCS inhibitor-  
420 mediated reduction of GluCer and GlcSph counteracts age-related microglial dysfunction and NK  
421 cell activation in several brain regions in *Gba*<sup>loxp/loxp</sup> Cx3cr1<sup>Cre/+</sup> mice. Together, these findings  
422 not only validate GlcCer/GlcSph as the proximate cause of neuroinflammation involving microglia  
423 and NK cells but also promising utility of brain permeant small molecule inhibitor as a therapeutic  
424 approach for neuronopathic GD.

#### 425 **Generating novel candidate biomarkers of neurodegeneration in *Gba*-deficiency**

426 Given the striking relationship between serum Nf-L, level of pathogenic lipid, GlcSph, and  
427 neurodegenerative phenotype, we sought to validate these biomarkers in translational studies in  
428 GD patients and explore other potential biomarkers suggested by our results. Lack of circulating  
429 biomarkers for pre-symptomatic *Gba* deficiency associated neurodegenerative diseases is a major  
430 impediment to optimal management of patients and conduct of clinical trials. Therefore, we  
431 investigated if serum levels of neurofilament light (Nf-L), an accepted biomarker of neuroaxonal  
432 injury in several neurodegenerative and neuroinflammatory diseases (Gaetani et al., 2019; Khalil  
433 et al., 2020; Loeffler et al., 2020; Weinhofer et al., 2021), could serve as a biomarker of  
434 neurodegeneration in nGD models. Using ultra-sensitive Quanterix Simoa™, we found a massive  
435 2,000-fold elevation of serum Nf-L in nGD mice, ~100-fold elevation in nGD Cx3cr1<sup>Cre/+</sup>, and

436 ~20-fold elevation in nGD Nes<sup>Cre/+</sup> mice (Fig. 8A). Remarkably, GZ-161 treatment which led to  
437 reductions in GlcSph levels also led to significant decline in serum Nf-L levels in nGD and nGD  
438 Cx3cr1<sup>Cre/+</sup> mice (Fig. 8A). Serum Nf-L level in nGD mice (18,100± 4809 pg/ml) was reduced by  
439 GZ-161 treatment to 6,876±1080 pg/ml. Conversely, GZ-161 treatment of nGD Cx3cr1<sup>Cre/+</sup> mice  
440 dramatically reduced Nf-L level to 1297±534.1 pg/ml compared to untreated mice (5466±557.2  
441 pg/ml). The residual Nf-L level after GZ-161 treatment in nGD Cx3cr1<sup>Cre/+</sup> mice was significantly  
442 lower than that in nGD mice treated with GZ-161, consistent with the synergistic effect of GCS  
443 inhibition and restoration of *Gba* function in microglia (Fig. 8A). Increased survival of nGD and  
444 nGD Cx3cr1<sup>Cre/+</sup> mice after GZ-161 treatment correlated with amelioration of neurodegeneration,  
445 as indicated by serum Nf-L levels. Notably, consistent with the age-related progression of  
446 neuroaxonal damage, there was a clear age-related increase in serum Nf-L levels with the most  
447 significant increase in aged *Gba*<sup>loxp/loxp</sup> Cx3cr1<sup>Cre/+</sup> mice (Fig. 8B). Serum levels of Nf-L and  
448 GlcSph were strongly correlated ( $r=0.8344$ ,  $p<0.0001$ ), consistent with a direct link between  
449 lysosomal generation of toxic GlcSph and neuroaxonal injury (Fig. 8C). Together, these data  
450 support the notion that GlcSph (and GluCer) reduction therapy with the brain-penetrant GCS  
451 inhibitor GZ-161 ameliorates neurodegeneration in nGD mice. Moreover, the results suggest that  
452 serum Nf-L and GlcSph are promising biomarkers of neurodegeneration in *Gba* deficiency.  
453 Our findings of serum Nf-L correlating with severity of neurodegeneration as well as serum levels  
454 of GlcSph in various permutations of nGD mice model, for the first time reveal that such  
455 circulating biomarkers may exist not only for tracking the severity of neurodegeneration but also  
456 for monitoring the response to therapy. Therefore, we conducted an analysis of several candidate  
457 biomarkers of neurodegeneration in patients with GD. We compared serum Nf-L levels in GD3  
458 patients with early mild neurodegenerative symptoms with age-matched GD1 patients who did not

459 develop early onset neurodegeneration. Serum Nf-L levels were elevated in GD3 patients  
460 compared to those in GD1 (Fig. 8D). This increase in serum Nf-L levels was associated with  
461 elevated serum GlcSph levels in GD3 patients (Fig. 8E). Akin to age-related increases in serum  
462 Nf-L levels in *Gba*<sup>loxp/loxp</sup> *Cx3cr1*<sup>Cre/+</sup> mice, indicative of age-related progression of neuroaxonal  
463 damage (Fig. 8B), serum Nf-L levels were significantly elevated in adult GD1 patients as  
464 compared to children with GD1 and adult healthy controls (Fig. 8F). This is significant, as adult  
465 GD1 patients are at an increased risk of Parkinson's disease/Lewy body dementia. The finding of  
466 striking LysoPC accumulation in *Gba*-deficient microglia (Fig. 8G) prompted us to measure  
467 LysoPC in the sera of GD1 patients, comparing young and older patients. Similar to the results  
468 with serum Nf-L, older GD1 patients exhibited increased serum levels of LysoPC 16:1 (Fig. 8H).  
469 These findings raise the possibility of broader involvement of lipid metabolism pathways beyond  
470 the primary *Gba* defect in GD and fuller understanding could lead to useful biomarkers for the  
471 clinic and role of co-regulated lipids in pathophysiology that may be targeted by treatments for  
472 GD.

473 Next, building upon the striking induction of ApoE expression beyond the astrocytes seen in our  
474 study, we examined ApoE as a potential biomarker for GD. In steady state, ApoE plays a critical  
475 role in lipid metabolism in the brain, with the largest contribution from astrocytes. In disease  
476 settings, the induction of ApoE is among the key signature genes of DAM. Thus, the role of ApoE  
477 in the brain is multifaceted, including lipid homeostasis, modulation of neuroinflammation, and  
478 neuronal repair (Serrano-Pozo et al., 2021). Hence, in the context of an inborn error of lipid  
479 metabolism exemplified by Gaucher disease with prominent neurodegeneration, it is highly  
480 relevant to explore ApoE expression in various brain cells in different states of nGD. We found  
481 prominent ApoE expression in astrocytes and activated microglia in nGD mice. Additionally, there

482 was a striking induction of ApoE in multiple neuronal cell types as well as in endothelial cells  
483 (fig.S9B). Interestingly, there was concomitant induction of *ABCA1*, suggesting coupling with  
484 increased efflux of accumulating pathogenic lipids from cells in *Gba* deficient brain (fig.S9C).  
485 Therefore, we measured ApoE in the sera of 55 adults with confirmed GD1 before and after  
486 enzyme replacement therapy (ERT), which dramatically lowered GlcSph and reversed systemic  
487 clinical manifestations. Sera of untreated GD1 patients showed markedly increased levels of ApoE  
488 compared to healthy control sera (Fig. 8I). ERT resulted in a marked decrease in ApoE levels (Fig.  
489 8J). Notably, elevated ApoE levels correlated significantly with serum GlcSph levels (Fig. 8K).  
490 The sensitivity and specificity of ApoE as a biomarker were underscored by the area under the  
491 receiver operator characteristics (ROC) of 0.92 ( $p < 0.001$ ) (Fig. 8L), similar to that seen in other  
492 accepted biomarkers of GD, such as chitotriosidase, gpNMB and GlcSph (Murugesan et al., 2016).

## 493 **DISCUSSION**

494 There is limited information of how *Gba* deficiency affects the cross talk between immune cells  
495 and neuronal cell types due to accumulating glucosylceramide lipids. Hence, there are no effective  
496 therapies for devastating neurodegenerative diseases associated with *Gba* mutations, and clinical  
497 trials have been severely hindered by a lack of reliable biomarkers. Previous studies in mice have  
498 suggested utility of brain permeant GCS inhibitor as treatment for neuronopathic GD but a clinical  
499 trial of Miglustat (N-butyldeoxynojirimycin), an iminosugar did not improve neurological end-  
500 points in GD3(Schiffmann et al., 2008). Subsequently, more potent GCS inhibitors based on  
501 ceramide analogs have shown more promise in genetic nGD model and in chemically induced  
502 model (Blumenreich et al., 2021; Cabrera-Salazar et al., 2012; Shayman, 2010; Wilson et al.,  
503 2020).

504 To delineate the impact of glycosphingolipid accumulation, identify candidate biomarkers, and  
505 assess the impact of GluCer/GlcSph lowering using a potent inhibitor of GCS, we developed an  
506 array of genetic mouse models to probe the cell-specific roles of *Gba* at single-cell resolution. Our  
507 models recapitulated both early as well as late-onset neurodegenerative GD, that provided unique  
508 insights through resolving the heterogeneity of brain macrophage populations. Our findings  
509 implicate the essential role of GlcCer-laden microglia and immune infiltrates (including CCR2<sup>+</sup>  
510 MFs defined as CD11b<sup>hi</sup> CD45<sup>+</sup> CCR2<sup>+</sup> CD64<sup>+</sup> TIMD4<sup>-</sup> population and NK cells) and astrocytes in  
511 orchestrating neuroinflammation. Our studies identified key attributes of GD associated  
512 neuroinflammation in the form of attrition of homeostatic microglia, emergence of DAM, influx  
513 of CCR2<sup>+</sup> MFs, activation of the ISG pathway and infiltration of activated NK cells. Massive  
514 cellular accumulation of GluCer/GlcSph due to *Gba* deficiency in microglia, immune infiltrates  
515 and neurons resulted in early onset of neuroinflammation which was attenuated into late-onset  
516 neurodegenerative disease by selective rescue of *Gba* in either microglia or neurons as well as by  
517 pharmacological reduction of GluCer/GlcSph in the brain using GCS inhibitor. Interestingly,  
518 inflammatory microglia also expressed several proposed biomarkers of GD, that we and others  
519 have reported such as complement pathway genes, gpNMB, cathepsin D, and cathepsin S  
520 (Afinogenova et al., 2019; Mistry et al., 2014; Murugesan et al., 2016; Pandey et al., 2017). Rescue  
521 of *Gba* in neuronal progenitors increased survival, but nevertheless, markedly shortened compared  
522 to control mice, requiring humane endpoint sacrifice due to morbid conditions and autistic  
523 behavior, reminiscent of human GD3 (Abdelwahab et al., 2017; Bilbo and Stevens, 2017; Wong  
524 et al., 2004). Late-onset neurodegenerative disease observed in some patients with GD1 (Bultron  
525 et al., 2010) appeared to be recapitulated in *Gba*<sup>loxp/loxp</sup> Cx3cr1<sup>Cre/+</sup> mice having slow progressive

526 neuroinflammation with accumulation of GluCer lipids in the brain, elevated serum Nf-L and  
527 DAM gene signatures.

528         In our nGD mouse models with robust neuroinflammation we found prominent GzmA<sup>+</sup>  
529 NK cell infiltration. Restoring *Gba* function in microglia alone showed limited effect on NK cell  
530 infiltration, however treatment with GCS inhibitor not only offset GluCer/GlcSph buildup, but  
531 also exhibited a novel immunomodulatory effect by abrogating NK cell activation. Therefore,  
532 combination therapy with GCS inhibitors and microglia-targeted therapeutics (Xu et al., 2020)  
533 merits further exploration. In general, the immune response of NK cells is fine-tuned by a balance  
534 of stimulatory and inhibitory signals based on a distinct receptor repertoire. In certain pathological  
535 states, injured neurons display activating NKG2D ligands that target them for NK cell-mediated  
536 injury (Davies et al., 2019). A potential mechanism relevant to our findings in nGD, for NK cell  
537 involvement in neurodegeneration is via HLA-1 recognition by NK cells through its inhibitory  
538 receptors Ly49 (in mice) and KIR (in humans), which mediate self/non-self-discrimination  
539 (Colonna and Samaridis, 1995; Karlhofer et al., 1992). Thus, downregulation of HLA-1 surface  
540 expression is envisioned to trigger NK cell-mediated neuronal injury due to ‘missing self’.  
541 Consistent with this notion, a recent study reported that altered cell surface GSL repertoire limited  
542 accessibility of HLA-1 by immune cells, such as CD8 T cells and NK cells, and treatment with a  
543 GCS inhibitor (N-butyl-deoxynojirimycin) fully restored accessibility to HLA-1 (Jongsma et al.,  
544 2021). Indeed, in our nGD models, a vastly more potent GCS inhibitor, GZ-161 was highly  
545 effective in reversing NK cell activation concomitant with marked reduction of brain  
546 glucosylceramide lipids. Therefore, it seems likely that in severe *Gba* deficiency, causing early  
547 onset neurodegeneration, altered cell surface GSLs in neurons impair the accessibility of HLA-1  
548 by NK cell receptors, triggering activation and neuronal degeneration.

549 Our studies show remarkable efficacy of potent brain penetrant GCS inhibitor, GZ-161 in  
550 reducing GluCer and GlcSph in immune and neuronal cells of nGD mice concomitant with  
551 amelioration of neuroinflammation and neurodegeneration. A prior clinical trial of GCS inhibitor  
552 N-butyldeoxynojirimycin in GD3 showed no effect on neurological symptoms (Schiffmann et al.,  
553 2008). In such clinical trials patients have established advanced neurological disease which can  
554 hinder assessment of full therapeutic effects. Therefore, a major unmet need in *GBA1* mutation  
555 associated neurodegenerative disease is the lack of suitable biomarkers to detect  
556 neurodegeneration before onset of overt neurological symptoms, such as saccades, ataxia, or  
557 seizures. We aimed to leverage the findings from our nGD models to generate novel biomarkers.  
558 In our study, neuroaxonal injury was reflected in the elevation of serum Nf-L (Gaetani et al., 2019;  
559 Weinhofer et al., 2021). Data from our nGD models with different rates of neurodegeneration,  
560 revealed Nf-L as a strong serum biomarker of neurodegeneration that correlated with survival as  
561 well as with serum GlcSph. The candidacy of these biomarkers is especially bolstered by the  
562 finding of rising levels of serum Nf-L and GlcSph in *Gba*<sup>loxp/loxp</sup> *Cx3cr1*<sup>Cre/+</sup> mice, as the only  
563 source of these biomarkers in these mice is from within the brain. These findings raise exciting  
564 opportunities to explore serum Nf-L as a biomarker of neurodegeneration to help address some  
565 major challenges in the management of patients with GD, that is, distinguish between GD2 and  
566 early onset GD3, track subclinical neurodegeneration in the extremely variable GD3, to help  
567 individualize future therapies and to identify GD1 individuals at-risk for PD/LBD. Indeed, we  
568 found that serum Nf-L levels were higher in GD3 patients than in age-matched GD1 patients.  
569 Moreover, Nf-L levels were higher in older patients with GD1 compared to younger patients. This  
570 is significant considering that older GD1 patients are at a risk of developing PD/LBD. In this  
571 context, our findings of serum Nf-L as a strong biomarker raise the exciting prospect of detecting



572 subclinical neurodegeneration, allowing early start of treatment to achieve better clinical outcome.  
573 There is an emerging consensus that providing treatment before the onset of overt disease  
574 manifestations offers prospects for best outcomes in inborn errors of metabolism. Studying larger  
575 cohorts of patients stratified by different types of neurodegeneration due to *Gba* mutations may  
576 aid further biomarker validation. The second promising biomarker emanates from striking  
577 induction of ApoE in all neuronal cell types beyond astrocytes and DAM in nGD models. Our  
578 translational result of striking elevation of ApoE levels in GD patients that correlates with GlcSph  
579 levels is compelling to explore the role of ApoE in neurodegeneration associated with *Gba*  
580 mutations. Indeed, a recent study showed increased prevalence of ApoE4 allele in heterozygote  
581 carriers of *GBA1* mutations who develop PD (Shiner et al., 2021).

582 Overall, through our systematic single cell transcriptome analysis, we identified cell  
583 populations, immunological and pathophysiological mechanisms underlying neurodegeneration  
584 associated with *GBA1* deficiency. This approach also yielded therapeutic targets and highly  
585 promising biomarkers for clinical validation to improve patient care and aid clinical trials.

### 586 **Limitations of the study**

587 There are several limitations of our studies. In *Gba*<sup>lnl/lnl</sup> model of fulminant neurodegeneration that  
588 phenocopies human GD2, GCS inhibitor prolonged survival significantly but the overall effect  
589 was modest. This is likely related to challenges in administering GCS inhibitor by gavage in the  
590 first days of life. While our study showed a critical role for both neuronal and microglial *Gba* in  
591 Gaucher-related neurodegeneration and involvement of NK cells, it was beyond the scope of  
592 current work to delineate a hierarchy of neuronal populations according to their vulnerability to  
593 toxic accumulation of lipids in setting of *Gba* deficiency and compensatory or pathological  
594 interactions with glial cells, infiltrating NK cells and other immune cells. With regard to

595 application of our findings to human health, an earlier randomized trial of GCS inhibitor, N-  
596 butyldeoxynojirimycin was not successful in ameliorating neurological symptoms. However, it is  
597 relatively weak inhibitor of GCS with more potent inhibitory off-target effects (Schiffmann et al.,  
598 2008). However, more specific and potent GCS inhibitors are showing early promise (Schiffmann,  
599 2020; Wilson et al., 2020).

## 600 Main Figure Legends

601  
602 **Fig. 1. Loss of Gba induces microglial activation and immune cell infiltration in nGD brain.**  
603 (A) FACS analysis on the whole brain of  $Gba^{wt/wt}$ ,  $Gba^{Inl/wt}$  and nGD ( $Gba^{Inl/Inl}$ ) mice performed at  
604 indicated days. The gates indicate cell populations revealed by CD11b and CD45 expression:  
605  $CCR2^+$  MFs ( $CD11b^{hi}CD45^+$ ), microglia ( $CD11b^{lo}CD45^+$ ) and immune infiltrates  
606 ( $CD11b^{lo}CD45^{hi}$ ). The data is representative of three independent experiments. (B) Bar graph  
607 compares percentage of  $CCR2^+$  MFS, microglia and immune infiltrates between  $Gba^{wt/wt}$ ,  $Gba^{Inl/wt}$   
608 and nGD mice brain (n=6 to 8 mice/group); statistical significance was determined using t test  
609 with using Bonferroni-Dunn correction for multiple comparisons ( $***p<0.0001$ ). (C) tSNE plot  
610 depicting different microglial and non-microglial cell subsets. The clusters are coded based on  
611 their mice affiliation (on left). In total, 14 clusters containing 6 microglia clusters and 9 clusters of  
612 immune cells (on right). (D) Hierarchical clustering of differentially expressed genes associated  
613 with type 1 IFN genes from nGD mice versus the control mice.  $p<0.05$  was considered significant  
614 (2-sided t tests). All individual type 1 IFN genes with significant differential expression are listed  
615 on right. (H) Neurofilament light chain (Nf-L) levels in the serum of nGD, nGD  $Cx3cr1^{Cre/+}$  and  
616 nGD  $Nes^{Cre/+}$  mice compared to littermate controls. Experiments are repeated twice, and data  
617 presented here is from one experiment (n= 2 to 4 mice/group). Error bars represent Means  $\pm$  SEM;  
618 p values are calculated with Welch's test ( $**p<0.001$  and  $***p<0.0001$ ).

619  
620 **Fig. 2. Gba deficiency in neurons aid in microglial activation and immune cell infiltration.**  
621 (A) Schematic showing overview of the mouse models and methods used in the study. (B) Kaplan-  
622 Meier Survival analysis of nGD, nGD  $Cx3cr1^{Cre/+}$  and nGD  $Nes^{Cre/+}$  mice cohorts with their  
623 respective littermate controls (n= 5 to 6 mice/group) using log-rank (Matel-Cox) test  
624 ( $***p<0.0001$ ). (C) Bar graph shows comparison of percentage of  $CCR2^+$  MFs, microglia and  
625 immune infiltrates between nGD, nGD  $Cx3cr1^{Cre/+}$  and nGD  $Nes^{Cre/+}$  mice with littermate controls  
626 (n= 3 to 6 mice/group). Bar graph showing percentage of Pro-IL-1 $\beta^+$  microglia cells in (D) nGD  
627 vs control mice (n=5-6/ group), (E) nGD  $Cx3cr1^{Cre/+}$  vs control mice (n=5-6/ group) and (F) nGD  
628  $Nes^{Cre/+}$  vs the control mice (n=3 mice/group). (G) Quantitative analysis of total GluCer species  
629 and GlcSph levels by LC-ESI-MS/ MS in nGD, nGD  $Cx3cr1^{Cre/+}$  mice and nGD  $Nes^{Cre/+}$  mice  
630 brain compared with the control mice (n=4-8 mice/group). (C-G) shows representative data from  
631 two independent experiments using controls. Means  $\pm$  SEM are shown. Unpaired t-test, two tailed  
632 was used to test significance.  $*p<0.05$ ,  $**p<0.001$  and  $***p<0.0001$ .

633  
634 **Fig. 3. Aged  $Gba^{loxP/loxP}$   $Cx3cr1^{Cre/+}$  mice brain show alteration of microglia subsets and**  
635 **neurodegeneration.**

636 (A) Quantitative analysis of total GluCer/GlcSph levels in  $Gba^{loxp/loxp} Cx3cr1^{Cre/wt}$  mice and control  
637 mice (n=3 mice/group). Statistical significance was determined using t test with using Bonferroni-  
638 Dunn correction for multiple comparisons (\* $p < 0.05$ , \*\* $p < 0.001$  and \*\*\* $p < 0.0001$ ) (B)  
639 Quantitative analysis of serum GlcSph levels in young and aged  $Gba^{loxp/loxp} Cx3cr1^{Cre/wt}$  mice and  
640 control mice (n=8-11 mice/group; repeated at least 3 times). (C) Bar graph shows comparison of  
641 percentage of CCR2+ MFs, microglia and immune infiltrates between young and aged  $Gba^{loxp/loxp}$   
642  $Cx3cr1^{Cre/wt}$  mice and control mice (n=3 mice/group; repeated at least 3 times). (D) UMAP plots  
643 show clustering of microglia from young and aged  $Gba^{loxp/loxp} Cx3cr1^{Cre/wt}$  mice. Cells are colored  
644 by cluster (Left) and by age (Right). (E) Hierarchical heat map depicting differential expression  
645 of genes taken from Wang et al and compared between microglia cluster from young and aged  
646  $Gba^{loxp/loxp} Cx3cr1^{Cre/wt}$  mice. (F) Fraction of cells for each cluster present in young and aged  
647  $Gba^{loxp/loxp} Cx3cr1^{Cre/wt}$  mice respectively. (G) Gene expression heat map for clusters defined as  
648 microglia. (A-B) Data represents 3 biological replicates. Means  $\pm$  SEM are shown. Unpaired t-  
649 test, two tailed was used to test significance \* $p < 0.05$ , \*\* $p < 0.001$  and \*\*\* $p < 0.0001$ .

650  
651 **Fig. 4. NK cell infiltration into the brain of nGD, nGD  $Cx3cr1^{Cre/+}$  mice.** (A) CD45<sup>+</sup> cells form  
652 the whole brain of nGD, nGD  $Cx3cr1^{Cre/+}$  and control mice were gated to analyze CD3<sup>-</sup>NK1.1<sup>+</sup>  
653 NK cells. Bar graphs represent the percentage of NK cells in the immune infiltrates of (B) nGD  
654 mice brain (n=5 mice/group) and (C) nGD  $Cx3cr1^{Cre/+}$  mice brain respectively (n=4 mice/group).  
655 (D) Expression of granzyme A (GzmA) in the brain infiltrating NK cells of nGD and nGD  
656  $Cx3cr1^{Cre/+}$  mice. Bar graphs compares the percentage of GzmA<sup>+</sup> NK cells in in the immune  
657 infiltrates of (E) nGD vs control mice brain (n=5 mice/group) and (F) nGD  $Cx3cr1^{Cre/+}$  vs control  
658 mice brain respectively (n= 4 mice/group). Percentage of NK1.1<sup>+</sup> NK cells and GzmA<sup>+</sup> NK cells  
659 in the spleen of (G) nGD mice and (H) nGD  $Cx3cr1^{Cre/+}$  mice (n=4-5 mice/group). Bar graph  
660 showing percentage of (I) immune infiltrates (J) Pro-IL-1 $\beta$ <sup>+</sup> microglia cells (K) percentage of NK  
661 cells and L. GzmA<sup>+</sup> NK cells in the whole brain of  $Gba^{wt/wt}$  treated with vehicle or CBE.  
662 Experiments were repeated thrice. (A) and (D) were representative from one of the experiments,  
663 (B), (C), (E-L) data are combined from 2 such experiments. Data are shown as means  $\pm$  SEM.  
664 Unpaired t-test, two tailed was used to test significance. \* $p < 0.05$ , \*\* $p < 0.001$  and \*\*\* $p < 0.0001$ .

665  
666  
667 **Fig. 5. snRNAseq reveals key role of microglia astrocytes and neurons in GD associated**  
668 **neuroinflammation**

669 (A) UMAP data from nGD (2 wk. old), nGD  $Cx3cr1^{Cre/+}$  (2 and 6 wk. old respectively), nGD  
670  $Nes^{Cre/+}$  mice (n=3) and corresponding control mice, colored by genotype (top) and cell clusters  
671 (bottom). (B) AUC analysis for select lysosome, Interferon signature genes (ISG), chemokine and  
672 Apoe gene sets significantly enriched (FDR < 0.05) in microglia, Purkinje, Oligodendrocyte,  
673 Astrocyte and neuro clusters of nGD (2 wks.) vs control mice; nGD  $Cx3cr1^{Cre/+}$  (2 and 6 wks.  
674 respectively) vs control mice; nGD  $Nes^{Cre/+}$  mice vs control mice. Row side bar colors indicate  
675 mice genotype, age and cell clusters. (C) Pie chart displays the number of differentially expressed  
676 genes (DEGs) in neuronal clusters of nGD (2 wks.) vs control mice (green); nGD  $Cx3cr1^{Cre/+}$  (2  
677 wks. (orange) and 6 wks. (maroon) respectively); nGD  $Nes^{Cre/+}$  mice (pink) vs control mice with  
678  $\log_2$ (Fold Change) and adjusted p-value < 0.05. Total DEGs from each set of mice are stated in  
679 the middle of pie chart with number of DEGs and the neuronal cluster in brackets are shown to the  
680 right of each pie chart. (D) Bar graph represents the number of DEGs in neuronal clusters of nGD  
681 2 wks. (green) vs nGD  $Cx3cr1^{Cre/+}$  6 wks. (maroon) with  $\log_2$ (Fold Change) and adjusted p-value

682 < 0.05. (E) Heat map of differentially expressed genes associated with Disease Associated  
683 Astrocytes (DAA) from nGD; nGD Cx3cr1<sup>Cre/+</sup> (2 wks. and 6 wks. respectively); nGD Nes<sup>Cre/+</sup>  
684 mice vs control mice. p<0.05 was considered significant (2-sided t tests). All individual DAA  
685 genes with significant differential expression are listed on bottom and the astrocyte clusters are  
686 shown in right. Red, positive z-score; white, zero z-score; blue, negative z-score. (F) Ingenuity  
687 Pathway Analysis (IPA) from nGD vs WT, nGD Cx3cr1<sup>Cre/+</sup> vs WT Cx3cr1<sup>Cre/+</sup> at 2 and 6 wks.  
688 old mice; nGD Nes<sup>Cre/+</sup> mice vs WT Nes<sup>Cre/+</sup> in neuron cluster, in microglia and Astrocytes.  
689 Orange, positive z-score; white, zero z-score; blue, negative z-score; gray dots are statistically  
690 insignificant. (G) Representative flow cytometry histogram (left) and quantification of CellROX  
691 fluorescence in astrocytes. (H) Histogram (left) and quantification (right) of BODIPY fluorescence  
692 in astrocytes of nGD mice. (I) Flow cytometry histogram (left) and quantification (right) of  
693 CellROX fluorescence in activated and homeostatic microglia from nGD mice. (J) Histogram  
694 (left) and quantification (right) of BODIPY fluorescence in activated and homeostatic microglia  
695 from nGD mice n=3-4 mice per group. Data were replicated in at least two independent  
696 experiments. Unpaired t-test, two tailed was used to test significance. \*p<0.05, \*\*p<0.001 and  
697 \*\*\*p<0.0001.  
698

699 **Fig. 6. Effects of GCS inhibitor (GZ-161) on microglia and GzmA<sup>+</sup> cells.** (A) Kaplan-Meier  
700 Survival analysis of nGD and nGD Cx3cr1<sup>Cre/+</sup> mice after GZ-161 treatment compared to vehicle  
701 treated controls (n=4-10 mice/group). (B) Quantitative analysis of serum GlcSph levels by LC-  
702 ESI-MS/ MS in nGD, nGD Cx3cr1<sup>Cre/+</sup> mice with and without GZ-161 treatment compared with  
703 the vehicle treated controls (n=4-10 mice/group). (C) Representative FACS staining of microglia,  
704 activated microglia and immune infiltrates in wild type and nGD mice with and without treatment  
705 with GZ-161. (D) Graph represents percentages of microglia, CCR2<sup>+</sup> MFs and immune infiltrates  
706 in wild type and nGD mice with and without treatment with GZ-161 (n=4-6 mice/group). (E) Bar  
707 graph showing percentage of Pro-IL-1β<sup>+</sup> microglia cells in wild type and nGD mice with and  
708 without treatment with GZ-161 (n=3-5 mice/group; repeated at least 3 times). (F) Bar graph  
709 showing percentage of Pro-IL-1β<sup>+</sup> microglia cells in wild type and nGD Cx3cr1<sup>Cre/+</sup> mice with and  
710 without treatment with GZ-161 (n=3-5 mice/group). (G). Percentage of GzmA<sup>+</sup> CD45<sup>+</sup> cells in  
711 wild type and nGD Cx3cr1<sup>Cre/+</sup> mice with and without treatment with GZ-161 (n=3-4 mice/group  
712 (n=3-5 mice/group). (H) Bar graphs compares the percentage of NK cells in Gba<sup>wt/wt</sup> and mice  
713 treated with CBE and CBE+ GZ-161 respectively (n=3-4 mice/group (n=3-5 mice/group; repeated  
714 at least 3 times). Data represents 3 biological replicates. Means ± SEM are shown. Unpaired t-test,  
715 two tailed was used to test significance. \*p<0.05, \*\*p<0.001 and \*\*\*p<0.0001.  
716

717 **Fig. 7. Long term treatment with GCS inhibitor, GZ-161, counteracts age-related microglial**  
718 **dysfunction and NK cell activation.**

719 (A) Signal intensities of HexCer species and LysoPC identified by MALDI across Gba<sup>loxp/loxp</sup>  
720 Cx3cr1<sup>Cre/wt</sup> mice treated with either vehicle or GZ161 and control mice brain. The color bars in  
721 MALDi images show signal intensity: blue to yellow indicates low to high levels. (B) UMAP plots  
722 show clusters of CD45<sup>+</sup> cells from brain of control and Gba<sup>loxp/loxp</sup> Cx3cr1<sup>Cre/wt</sup> mice treated with  
723 either GZ161 or vehicle. Cells are colored by mice genotype (Left top) and by cluster (Left  
724 bottom). Microglia sub cluster of CD45<sup>+</sup> cells, colored by mice (Right top) and by clusters (Right  
725 bottom). (D) Hierarchical heat map depicting differential expression of genes associated with  
726 homeostatic and disease associated microglia in the different microglia clusters. (D) Fraction of  
727 cells present in each microglial cluster from control and Gba<sup>loxp/loxp</sup> Cx3cr1<sup>Cre/wt</sup> mice treated with

728 either GZ161 or vehicle. (E) Histogram showing differential expression of selected genes in  
729 cluster 17 from control and  $Gba^{loxp/loxp} Cx3cr1^{Cre/wt}$  mice treated with either GZ161 or vehicle.

730  
731 **Fig. 8. Clinical evaluation of ApoE and Nf-L as biomarkers of GD associated**  
732 **neurodegeneration.**

733 (A) Quantitative analysis of serum Nf-L levels in nGD, nGD  $Cx3cr1^{Cre/+}$  and nGD  $Nes^{Cre/+}$  mice  
734 with and without GZ-161 treatment compared with the vehicle treated controls (n=4-10  
735 mice/group; two independent experiments). (B) Comparison of serum Nf-L levels between  
736 young and aged  $Gba^{loxp/loxp} Cx3cr1^{Cre/wt}$  mice along with control mice (n=8-11 mice/group). (C)  
737 Correlation between serum GlcSph and Nf-L levels in nGD, nGD  $Cx3cr1^{Cre/+}$  mice, nGD  $Nes^{Cre/+}$   
738 and control mice. The p value obtained from Spearman's rank correlation coefficient test was <  
739 0.0001 (n=69 mice). (D) Quantitative analysis of serum Nf-L levels (log<sub>2</sub> scale) in GD 3 patients  
740 (n=5) compared with age matched GD1 patient (n= 6). (E) Quantitative analysis of serum levels  
741 GlcSph in GD 3 patients (n=3) compared with age matched GD1 patient (n= 6). (F) Quantitative  
742 analysis of serum Nf-L levels (log<sub>2</sub> scale) in young GD1 patients (n=12) compared with adult  
743 GD1 patient (n= 25) and adult healthy controls (n= 28). (G) Signal intensities of LysoPC  
744 identified by MALDI across  $Gba^{loxp/loxp} Cx3cr1^{Cre/wt}$  mice treated with either vehicle or GZ161  
745 and control mice brain. The color bars in MALDI images show signal intensity: blue to red  
746 indicates low to high levels. (H) Quantitative analysis of serum levels of LysoPC 16:1 species in  
747 young GD 1 patients (n=12) compared with adult GD1 patient (n= 26). (I) Graph represents  
748 ApoE levels in the sera of untreated GD1 patients (n=55) and healthy controls (n=43). (J) Graph  
749 represents ApoE levels in the sera of untreated GD1 patients (n=55) and after Enzyme  
750 Replacement Therapy (ERT) (n=55). (K) Correlation between serum GlcSph and ApoE levels in  
751 sera of GD1 patients. The p value obtained from Pearson's correlation test was < 0.001 (n=21  
752 patients). (L) ROC curves for serum ApoE expression in GD1 patients and Area Under the  
753 Curve (AUC). Means  $\pm$  SEM are shown. Differences between groups were analyzed using  
754 unpaired t-test A-B Mann-Whitey test (C,E,H and I), two tailed. \*p<0.05, \*\*p<0.001 and  
755 \*\*\*p<0.0001.

756

757

## 758 References and Notes

- 759 Abdelwahab, M., M. Potegal, E.G. Shapiro, and I. Nestrasil. 2017. Previously unrecognized  
760 behavioral phenotype in Gaucher disease type 3. *Neurol Genet* 3:e158.
- 761 Afinogenova, Y., J. Ruan, R. Yang, N. Kleytman, G. Pastores, A. Lischuk, and P.K. Mistry. 2019.  
762 Aberrant progranulin, YKL-40, cathepsin D and cathepsin S in Gaucher disease. *Mol Genet*  
763 *Metab* 128:62-67.
- 764 Aharon-Peretz, J., H. Rosenbaum, and R. Gershoni-Baruch. 2004. Mutations in the  
765 glucocerebrosidase gene and Parkinson's disease in Ashkenazi Jews. *N Engl J Med*  
766 351:1972-1977.
- 767 Batiuk, M.Y., A. Martirosyan, J. Wahis, F. de Vin, C. Marneffe, C. Kusserow, J. Koeppen, J.F. Viana,  
768 J.F. Oliveira, T. Voet, C.P. Ponting, T.G. Belgard, and M.G. Holt. 2020. Identification of  
769 region-specific astrocyte subtypes at single cell resolution. *Nat Commun* 11:1220.

- 770 Belarbi, K., E. Cuvelier, M.A. Bonte, M. Desplanque, B. Gressier, D. Devos, and M.C. Chartier-  
771 Harlin. 2020. Glycosphingolipids and neuroinflammation in Parkinson's disease. *Mol*  
772 *Neurodegener* 15:59.
- 773 Bilbo, S., and B. Stevens. 2017. Microglia: The Brain's First Responders. *Cerebrum* 2017:  
774 Blumenreich, S., C. Yaacobi, A. Vardi, O.B. Barav, E.B. Vitner, H. Park, B. Wang, S.H. Cheng, S.P.  
775 Sardi, and A.H. Futerman. 2021. Substrate reduction therapy using Genz-667161 reduces  
776 levels of pathogenic components in a mouse model of neuronopathic forms of Gaucher  
777 disease. *J Neurochem* 156:692-701.
- 778 Bodennec, J., D. Pelled, C. Riebeling, S. Trajkovic, and A.H. Futerman. 2002. Phosphatidylcholine  
779 synthesis is elevated in neuronal models of Gaucher disease due to direct activation of  
780 CTP:phosphocholine cytidyltransferase by glucosylceramide. *FASEB J* 16:1814-1816.
- 781 Bultron, G., K. Kacena, D. Pearson, M. Boxer, R. Yang, S. Sathe, G. Pastores, and P.K. Mistry. 2010.  
782 The risk of Parkinson's disease in type 1 Gaucher disease. *J Inherit Metab Dis* 33:167-173.
- 783 Cabrera-Salazar, M.A., M. Deriso, S.D. Bercury, L. Li, J.T. Lydon, W. Weber, N. Pande, M.A.  
784 Cromwell, D. Copeland, J. Leonard, S.H. Cheng, and R.K. Scheule. 2012. Systemic delivery  
785 of a glucosylceramide synthase inhibitor reduces CNS substrates and increases lifespan in  
786 a mouse model of type 2 Gaucher disease. *PLoS One* 7:e43310.
- 787 Chen, Y., and M. Colonna. 2021. Microglia in Alzheimer's disease at single-cell level. Are there  
788 common patterns in humans and mice? *J Exp Med* 218:
- 789 Chen, Y., X. Liu, and L. He. 2021. The value of long noncoding RNAs for predicting the recurrence  
790 of endometriosis: A protocol for meta-analysis and bioinformatics analysis. *Medicine*  
791 *(Baltimore)* 100:e26036.
- 792 Colonna, M., and J. Samaridis. 1995. Cloning of immunoglobulin-superfamily members associated  
793 with HLA-C and HLA-B recognition by human natural killer cells. *Science* 268:405-408.
- 794 Crusio, W.E. 2001. Genetic dissection of mouse exploratory behaviour. *Behav Brain Res* 125:127-  
795 132.
- 796 Davies, A.J., H.W. Kim, R. Gonzalez-Cano, J. Choi, S.K. Back, S.E. Roh, E. Johnson, M. Gabriac, M.S.  
797 Kim, J. Lee, J.E. Lee, Y.S. Kim, Y.C. Bae, S.J. Kim, K.M. Lee, H.S. Na, P. Riva, A. Latremoliere,  
798 S. Rinaldi, S. Ugolini, M. Costigan, and S.B. Oh. 2019. Natural Killer Cells Degenerate Intact  
799 Sensory Afferents following Nerve Injury. *Cell* 176:716-728 e718.
- 800 Dick, S.A., A. Wong, H. Hamidzada, S. Nejat, R. Nechanitzky, S. Vohra, B. Mueller, R. Zaman, C.  
801 Kantores, L. Aronoff, A. Momen, D. Nechanitzky, W.Y. Li, P. Ramachandran, S.Q. Crome,  
802 B. Becher, M.I. Cybulsky, F. Billia, S. Keshavjee, S. Mital, C.S. Robbins, T.W. Mak, and S.  
803 Epelman. 2022. Three tissue resident macrophage subsets coexist across organs with  
804 conserved origins and life cycles. *Sci Immunol* 7:eabf7777.
- 805 Enquist, I.B., C. Lo Bianco, A. Ooka, E. Nilsson, J.E. Mansson, M. Ehinger, J. Richter, R.O. Brady, D.  
806 Kirik, and S. Karlsson. 2007. Murine models of acute neuronopathic Gaucher disease. *Proc*  
807 *Natl Acad Sci U S A* 104:17483-17488.
- 808 Farfel-Becker, T., E.B. Vitner, and A.H. Futerman. 2011. Animal models for Gaucher disease  
809 research. *Dis Model Mech* 4:746-752.
- 810 Finak, G., A. McDavid, M. Yajima, J. Deng, V. Gersuk, A.K. Shalek, C.K. Slichter, H.W. Miller, M.J.  
811 McElrath, M. Prlic, P.S. Linsley, and R. Gottardo. 2015. MAST: a flexible statistical  
812 framework for assessing transcriptional changes and characterizing heterogeneity in  
813 single-cell RNA sequencing data. *Genome Biol* 16:278.

- 814 Gaetani, L., K. Blennow, P. Calabresi, M. Di Filippo, L. Parnetti, and H. Zetterberg. 2019.  
815 Neurofilament light chain as a biomarker in neurological disorders. *J Neurol Neurosurg*  
816 *Psychiatry* 90:870-881.
- 817 Gegg, M.E., E. Menozzi, and A.H.V. Schapira. 2022. Glucocerebrosidase-associated Parkinson  
818 disease: Pathogenic mechanisms and potential drug treatments. *Neurobiol Dis*  
819 166:105663.
- 820 Grabowski, G.A., A.H.M. Antommaria, E.H. Kolodny, and P.K. Mistry. 2021. Gaucher disease: Basic  
821 and translational science needs for more complete therapy and management. *Mol Genet*  
822 *Metab* 132:59-75.
- 823 Habib, N., C. McCabe, S. Medina, M. Varshavsky, D. Kitsberg, R. Dvir-Szternfeld, G. Green, D.  
824 Dionne, L. Nguyen, J.L. Marshall, F. Chen, F. Zhang, T. Kaplan, A. Regev, and M. Schwartz.  
825 2020. Disease-associated astrocytes in Alzheimer's disease and aging. *Nat Neurosci*  
826 23:701-706.
- 827 Hinton, G.E.a.R., S.T. 2002. Stochastic Neighbor Embedding. *In Advances in Neural Information*  
828 *Processing Systems* 15:833-840.
- 829 Jongsma, M.L.M., A.A. de Waard, M. Raaben, T. Zhang, B. Cabukusta, R. Platzner, V.A. Blomen, A.  
830 Xagara, T. Verkerk, S. Bliss, X. Kong, C. Gerke, L. Janssen, E. Stickel, S. Holst, R. Plomp, A.  
831 Mulder, S. Ferrone, F.H.J. Claas, M.H.M. Heemskerk, M. Griffioen, A. Halenius, H.  
832 Overkleeft, J.B. Huppa, M. Wuhrer, T.R. Brummelkamp, J. Neefjes, and R.M. Spaapen.  
833 2021. The SPPL3-Defined Glycosphingolipid Repertoire Orchestrates HLA Class I-Mediated  
834 Immune Responses. *Immunity* 54:132-150 e139.
- 835 Kanfer, J.N., M.C. Stephens, H. Singh, and G. Legler. 1982. The Gaucher mouse. *Prog Clin Biol Res*  
836 95:627-644.
- 837 Karlhofer, F.M., R.K. Ribaldo, and W.M. Yokoyama. 1992. MHC class I alloantigen specificity of  
838 Ly-49+ IL-2-activated natural killer cells. *Nature* 358:66-70.
- 839 Khalil, M., L. Pirpamer, E. Hofer, M.M. Voortman, C. Barro, D. Leppert, P. Benkert, S. Ropele, C.  
840 Enzinger, F. Fazekas, R. Schmidt, and J. Kuhle. 2020. Serum neurofilament light levels in  
841 normal aging and their association with morphologic brain changes. *Nat Commun* 11:812.
- 842 Lee, J.K., and M.G. Tansey. 2013. Microglia isolation from adult mouse brain. *Methods Mol Biol*  
843 1041:17-23.
- 844 Loeffler, T., I. Schilcher, S. Flunkert, and B. Hutter-Paier. 2020. Neurofilament-Light Chain as  
845 Biomarker of Neurodegenerative and Rare Diseases With High Translational Value. *Front*  
846 *Neurosci* 14:579.
- 847 Mahad, D., M.K. Callahan, K.A. Williams, E.E. Ubogu, P. Kivisakk, B. Tucky, G. Kidd, G.A. Kingsbury,  
848 A. Chang, R.J. Fox, M. Mack, M.B. Sniderman, R. Ravid, S.M. Staugaitis, M.F. Stins, and  
849 R.M. Ransohoff. 2006. Modulating CCR2 and CCL2 at the blood-brain barrier: relevance  
850 for multiple sclerosis pathogenesis. *Brain* 129:212-223.
- 851 Mendiola, A.S., J.K. Ryu, S. Bardehle, A. Meyer-Franke, K.K. Ang, C. Wilson, K.M. Baeten, K.  
852 Hanspers, M. Merlini, S. Thomas, M.A. Petersen, A. Williams, R. Thomas, V.A. Rafalski, R.  
853 Meza-Acevedo, R. Tognatta, Z. Yan, S.J. Pfaff, M.R. Machado, C. Bedard, P.E. Rios  
854 Coronado, X. Jiang, J. Wang, M.A. Pleiss, A.J. Green, S.S. Zamvil, A.R. Pico, B.G. Bruneau,  
855 M.R. Arkin, and K. Akassoglou. 2020. Transcriptional profiling and therapeutic targeting  
856 of oxidative stress in neuroinflammation. *Nat Immunol* 21:513-524.

- 857 Mistry, P.K., J.L. Batista, H.C. Andersson, M. Balwani, T.A. Burrow, J. Charrow, P. Kaplan, A. Khan,  
858 P.S. Kishnani, E.H. Kolodny, B. Rosenbloom, C.R. Scott, and N. Weinreb. 2017a.  
859 Transformation in pretreatment manifestations of Gaucher disease type 1 during two  
860 decades of alglucerase/imiglucerase enzyme replacement therapy in the International  
861 Collaborative Gaucher Group (ICGG) Gaucher Registry. *Am J Hematol* 92:929-939.
- 862 Mistry, P.K., J. Liu, L. Sun, W.L. Chuang, T. Yuen, R. Yang, P. Lu, K. Zhang, J. Li, J. Keutzer, A.  
863 Stachnik, A. Mennone, J.L. Boyer, D. Jain, R.O. Brady, M.I. New, and M. Zaidi. 2014.  
864 Glucocerebrosidase 2 gene deletion rescues type 1 Gaucher disease. *Proc Natl Acad Sci U*  
865 *S A* 111:4934-4939.
- 866 Mistry, P.K., J. Liu, M. Yang, T. Nottoli, J. McGrath, D. Jain, K. Zhang, J. Keutzer, W.L. Chuang, W.Z.  
867 Mehal, H. Zhao, A. Lin, S. Mane, X. Liu, Y.Z. Peng, J.H. Li, M. Agrawal, L.L. Zhu, H.C. Blair,  
868 L.J. Robinson, J. Iqbal, L. Sun, and M. Zaidi. 2010. Glucocerebrosidase gene-deficient  
869 mouse recapitulates Gaucher disease displaying cellular and molecular dysregulation  
870 beyond the macrophage. *Proc Natl Acad Sci U S A* 107:19473-19478.
- 871 Mistry, P.K., E. Lukina, H. Ben Turkia, S.P. Shankar, H. Baris, M. Ghosn, A. Mehta, S. Packman, G.  
872 Pastores, M. Petakov, S. Assouline, M. Balwani, S. Danda, E. Hadjiev, A. Ortega, S.J.M.  
873 Gaemers, R. Tayag, and M.J. Peterschmitt. 2017b. Outcomes after 18 months of eliglustat  
874 therapy in treatment-naïve adults with Gaucher disease type 1: The phase 3 ENGAGE trial.  
875 *Am J Hematol* 92:1170-1176.
- 876 Murugesan, V., W.L. Chuang, J. Liu, A. Lischuk, K. Kacena, H. Lin, G.M. Pastores, R. Yang, J. Keutzer,  
877 K. Zhang, and P.K. Mistry. 2016. Glucosylsphingosine is a key biomarker of Gaucher  
878 disease. *Am J Hematol* 91:1082-1089.
- 879 Nagata, M., Y. Izumi, E. Ishikawa, R. Kiyotake, R. Doi, S. Iwai, Z. Omahdi, T. Yamaji, T. Miyamoto,  
880 T. Bamba, and S. Yamasaki. 2017. Intracellular metabolite beta-glucosylceramide is an  
881 endogenous Mincle ligand possessing immunostimulatory activity. *Proc Natl Acad Sci U S*  
882 *A* 114:E3285-E3294.
- 883 Nair, S., C.S. Boddupalli, R. Verma, J. Liu, R. Yang, G.M. Pastores, P.K. Mistry, and M.V. Dhodapkar.  
884 2015. Type II NKT-TFH cells against Gaucher lipids regulate B-cell immunity and  
885 inflammation. *Blood* 125:1256-1271.
- 886 Nair, S., A.R. Branagan, J. Liu, C.S. Boddupalli, P.K. Mistry, and M.V. Dhodapkar. 2016. Clonal  
887 Immunoglobulin against Lysolipids in the Origin of Myeloma. *N Engl J Med* 374:555-561.
- 888 Pandey, M.K., T.A. Burrow, R. Rani, L.J. Martin, D. Witte, K.D. Setchell, M.A. McKay, A.F.  
889 Magnusen, W. Zhang, B. Liou, J. Kohl, and G.A. Grabowski. 2017. Complement drives  
890 glucosylceramide accumulation and tissue inflammation in Gaucher disease. *Nature*  
891 543:108-112.
- 892 Platt, F.M., A. d'Azzo, B.L. Davidson, E.F. Neufeld, and C.J. Tiffet. 2018. Lysosomal storage diseases.  
893 *Nat Rev Dis Primers* 4:27.
- 894 Satija, R., J.A. Farrell, D. Gennert, A.F. Schier, and A. Regev. 2015. Spatial reconstruction of single-  
895 cell gene expression data. *Nat Biotechnol* 33:495-502.
- 896 Schiffmann, R., E.J. Fitzgibbon, C. Harris, C. DeVile, E.H. Davies, L. Abel, I.N. van Schaik, W. Benko,  
897 M. Timmons, M. Ries, and A. Vellodi. 2008. Randomized, controlled trial of miglustat in  
898 Gaucher's disease type 3. *Ann Neurol* 64:514-522.
- 899 Schiffmann, R.C., T.; Ida,H.; Mengel,E.; Mistry, P.; Crawford,N.; Gaemers, S.; Ji,A.;  
900 Peterschmitt,M.; Sharma,J.; Zhang,Qi ; Fischer T. 2020. Venglustat combined with



- 901 imiglucerase positively affects neurological features and brain connectivity in adults with  
902 Gaucher disease type 3. *Molecular Genetics and Metabolism* 129:144-145.
- 903 Serrano-Pozo, A., S. Das, and B.T. Hyman. 2021. APOE and Alzheimer's disease: advances in  
904 genetics, pathophysiology, and therapeutic approaches. *Lancet Neurol* 20:68-80.
- 905 Shiner, T., A. Mirelman, Y. Rosenblum, G. Kave, M.G. Weisz, A. Bar-Shira, O. Goldstein, A. Thaler,  
906 T. Gurevich, A. Orr-Urtreger, N. Giladi, and N. Bregman. 2021. The Effect of GBA Mutations  
907 and APOE Polymorphisms on Dementia with Lewy Bodies in Ashkenazi Jews. *J Alzheimers*  
908 *Dis* 80:1221-1229.
- 909 Sidransky, E., and G. Lopez. 2012. The link between the GBA gene and parkinsonism. *Lancet*  
910 *Neurol* 11:986-998.
- 911 Sidransky, E., M.A. Nalls, J.O. Aasly, J. Aharon-Peretz, G. Annesi, E.R. Barbosa, A. Bar-Shira, D.  
912 Berg, J. Bras, A. Brice, C.M. Chen, L.N. Clark, C. Condroyer, E.V. De Marco, A. Durr, M.J.  
913 Eblan, S. Fahn, M.J. Farrer, H.C. Fung, Z. Gan-Or, T. Gasser, R. Gershoni-Baruch, N. Giladi,  
914 A. Griffith, T. Gurevich, C. Januario, P. Kropp, A.E. Lang, G.J. Lee-Chen, S. Lesage, K.  
915 Marder, I.F. Mata, A. Mirelman, J. Mitsui, I. Mizuta, G. Nicoletti, C. Oliveira, R. Ottman, A.  
916 Orr-Urtreger, L.V. Pereira, A. Quattrone, E. Rogaeva, A. Rolfs, H. Rosenbaum, R.  
917 Rozenberg, A. Samii, T. Samaddar, C. Schulte, M. Sharma, A. Singleton, M. Spitz, E.K. Tan,  
918 N. Tayebi, T. Toda, A.R. Troiano, S. Tsuji, M. Wittstock, T.G. Wolfsberg, Y.R. Wu, C.P.  
919 Zabetian, Y. Zhao, and S.G. Ziegler. 2009. Multicenter analysis of glucocerebrosidase  
920 mutations in Parkinson's disease. *N Engl J Med* 361:1651-1661.
- 921 Simpson, D.S.A., and P.L. Oliver. 2020. ROS Generation in Microglia: Understanding Oxidative  
922 Stress and Inflammation in Neurodegenerative Disease. *Antioxidants (Basel)* 9:
- 923 Takizawa, H., R.R. Regoes, C.S. Boddupalli, S. Bonhoeffer, and M.G. Manz. 2011. Dynamic  
924 variation in cycling of hematopoietic stem cells in steady state and inflammation. *J Exp*  
925 *Med* 208:273-284.
- 926 Vincent D Blondel, J.-L.G., Renaud Lambiotte, and Etienne Lefebvre. . 2008. Fast unfolding of  
927 communities in large networks. *Journal of Statistical Mechanics: Theory and Experiment*  
928 10:10008.
- 929 Walzer, T., L. Chiossone, J. Chaix, A. Calver, C. Carozzo, L. Garrigue-Antar, Y. Jacques, M. Baratin,  
930 E. Tomasello, and E. Vivier. 2007. Natural killer cell trafficking in vivo requires a dedicated  
931 sphingosine 1-phosphate receptor. *Nat Immunol* 8:1337-1344.
- 932 Wang, S., M. Mustafa, C.M. Yuede, S.V. Salazar, P. Kong, H. Long, M. Ward, O. Siddiqui, R. Paul,  
933 S. Gilfillan, A. Ibrahim, H. Rhinn, I. Tassi, A. Rosenthal, T. Schwabe, and M. Colonna. 2020.  
934 Anti-human TREM2 induces microglia proliferation and reduces pathology in an  
935 Alzheimer's disease model. *J Exp Med* 217:
- 936 Weinhofer, I., P. Rommer, B. Zierfuss, P. Altmann, M. Foiani, A. Heslegrave, H. Zetterberg, A.  
937 Gleiss, P.L. Musolino, Y. Gong, S. Forss-Petter, T. Berger, F. Eichler, P. Aubourg, W. Kohler,  
938 and J. Berger. 2021. Neurofilament light chain as a potential biomarker for monitoring  
939 neurodegeneration in X-linked adrenoleukodystrophy. *Nat Commun* 12:1816.
- 940 Wilson, M.W., L. Shu, V. Hinkovska-Galcheva, Y. Jin, W. Rajeswaran, A. Abe, T. Zhao, R. Luo, L.  
941 Wang, B. Wen, B. Liou, V. Fannin, D. Sun, Y. Sun, J.A. Shayman, and S.D. Larsen. 2020.  
942 Optimization of Eliglustat-Based Glucosylceramide Synthase Inhibitors as Substrate  
943 Reduction Therapy for Gaucher Disease Type 3. *ACS Chem Neurosci* 11:3464-3473.

944 Wong, K., E. Sidransky, A. Verma, T. Mixon, G.D. Sandberg, L.K. Wakefield, A. Morrison, A. Lwin,  
945 C. Colegial, J.M. Allman, and R. Schiffmann. 2004. Neuropathology provides clues to the  
946 pathophysiology of Gaucher disease. *Mol Genet Metab* 82:192-207.  
947 Xu, Z., Y. Rao, Y. Huang, T. Zhou, R. Feng, S. Xiong, T.F. Yuan, S. Qin, Y. Lu, X. Zhou, X. Li, B. Qin, Y.  
948 Mao, and B. Peng. 2020. Efficient Strategies for Microglia Replacement in the Central  
949 Nervous System. *Cell Rep* 33:108443.  
950 Yona, S., K.W. Kim, Y. Wolf, A. Mildner, D. Varol, M. Breker, D. Strauss-Ayali, S. Viukov, M.  
951 Williams, A. Misharin, D.A. Hume, H. Perlman, B. Malissen, E. Zelzer, and S. Jung. 2013.  
952 Fate mapping reveals origins and dynamics of monocytes and tissue macrophages under  
953 homeostasis. *Immunity* 38:79-91.  
954

## 955 **Material Methods:**

### 956 **Patients**

957  
958 Stored serum samples of Gaucher disease patients were analyzed. All patients had diagnosis of  
959 Gaucher disease based on <10% of normal leucocyte acid- $\beta$  glucosidase activity. The study was  
960 approved by the Human Investigations Committee of Yale School of Medicine. 51 patients had  
961 type 1 Gaucher disease with at least one N370S (pArg409Ser) mutation in *GBA1* gene, mean age  
962 63.9 years (range 40 to 93 yrs.). Patients were stratified into young and older patients with mean  
963 age 11.25 yrs. vs 55.8 yrs. Five patients had Gaucher disease type 3 (homozygous for L444P  
964 mutation, pLeu483Leu). Mean age of 28 healthy controls was 38 yrs.

### 966 **Mice**

967 Mice were housed in the animal facility of Yale university in New Haven. All animal experiments  
968 were conducted in compliance with institutional regulations under authorized protocol (2016-  
969 10872) approved by the Institutional Animal Care and Use Committee.  $Gba^{Inl/Inl}$  mice or  $K14^{Inl/Inl}$   
970 were generated as described previously described (Enquist et al., 2007). We referred  $Gba^{Inl/Inl}$  as  
971 nGD mice throughout the text. We used K14 Cre, Cx3cr1 Cre and Nestin Cre obtained from  
972 Jackson labs. For breeding purpose, we used  $Gba^{Inl/wt}$  mice (gift from Sanofi Genzyme) that were  
973 then crossed with  $K14^{Cre/Cre}$  (Jackson labs) to obtain  $Gba^{Inl/wt} K14^{cre/cre}$ . These mice were used as  
974 parents to obtain nGD,  $Gba^{Inl/wt}$  and  $Gba^{wt/wt}$  pups. nGD  $Cx3cr1^{Cre/+}$  and nGD  $Nes^{Cre/+}$  were  
975 obtained by breeding these parents on to Cx3cr1 Cre and Nestin Cre.  $Gba^{loxp/loxp} Cx3cr1^{cre}$  mice  
976 were generated by crossing  $Gba^{loxp/loxp}$  (Mistry et al., 2010) with Cx3cr1 Cre mice obtained from  
977 Jackson labs. Mice of both sexes were used for the study

978  
979 **Brain tissue harvesting and cell preparation:** The complete brain was cut in to small pieces and  
980 incubated with digestion buffer (RPMI supplemented with 2% FBS, 2mM HEPES, 0.4mg/ml  
981 Collagenase D and 2mg/ml DNase) for 30 min at 37°C under shaking. To stop enzymatic digestion  
982 EDTA 5mM was used and the sample was homogenized with a syringe. This was then followed  
983 by gradient centrifugation and cell separation was achieved via Percoll gradients (GE Healthcare  
984 Life Sciences) of various densities (Lee and Tansey, 2013). Myelin was then removed by vacuum  
985 suction and cells were isolated from the interphase. The interphase was diluted with 10ml of HBSS  
986 and centrifuged at 500g for 7 min to obtain cell pellet that was used for cellular analysis.  
987

988 **Flow cytometry:** Fluorochrome labelled antibodies used for the flow cytometry are listed in the  
989 key resource table. In brief surface staining was performed ex vivo using antibodies to CD11b,  
990 CD45, Gr-1, CD3, CD8, CD4, CD103, CD69 and NK1.1 (BD Biosciences); ACSA-2 antibody  
991 (Miltenyi Biotec). For staining of the intracellular antigens GZM-A and Pro IL-1 $\beta$  (BD  
992 Biosciences) cells were stimulated with cell stimulation cocktail (ebioscience) for 4h. After surface  
993 staining with antibodies, cells were fixed and permeabilized using BD cytofix and Cytoperm and  
994 antibodies recognizing GZM-A and Pro IL-1 $\beta$ .

995

#### 996 **Sorting of cells by flow cytometry**

997 Isolated total brain cells were resuspended at 1 million cells/ml of PBS and Live/Dead Fixable  
998 Violet Dead Cell Stain (ThermoFisher) for 10 min to exclude nonviable cells. Cells were washed  
999 once in excess PBS and then, cells were suspended in ice- cold FACS buffer (10% FBS in PBS  
1000 with 1% HEPES +0.5% EDTA) and stained with anti-mouse CD45 and anti-mouse CD11b  
1001 antibody (BD Pharmigen) for 30 min at 4 °C. All cells were washed twice with FACS buffer and  
1002 sorted into polypropylene tubes with 500  $\mu$ l of ice-cold FACS buffer. All samples were acquired  
1003 on the BD FACS Aria.

1004

1005 **Single- cell RNA sequencing (scRNA) seq:** All cells were prepared through 10X Genomics V3  
1006 3' Gene Expression kit and sequenced on NovaSeq flow cells to achieve high read depth. We used  
1007 the pre-processed digital gene expression matrices as obtained from cell ranger (as run by the  
1008 YCGA sequencing core facility). These matrices were processed using Seurat (Satija et al., 2015).  
1009 The clusters were determined using Louvain algorithm for community detection (Vincent D  
1010 Blondel, 2008). Differential gene expression between the clusters was carried out using the MAST  
1011 method (Finak et al., 2015). The visualizations and analysis were carried out in R (R Core Team).  
1012 The data is visualized as tSNE (Hinton, 2002). From 14day pups we sequenced total of 4895  
1013 CD45+ cells. For GZ161 treatment experiments we sequenced total of 40763 CD45+ cells that  
1014 consists of 4 groups of mice with 3 mice/ each group.

1015

1016 **Subsetting of microglia cells:** Based on the clustering of CD45<sup>+</sup> cells clusters 1, 16 and 26 were  
1017 kept for final analysis. The clusters were selected based on the microglial gene expression. The  
1018 clusters comprised 4230 cells. Scoring used z-scores of homeostatic microglia genes, DAM genes  
1019 from (Wang et al., 2020).

1020

#### 1021 **Single- nuclear RNA sequencing (snRNA seq):**

1022

1023 **Nuclei Isolation:** Brain Tissue samples were stored at -80°C. For tissue lysis and washing of  
1024 nuclei, sample sections were added to 1 mL lysis buffer (Nuclei PURE lysis buffer, Sigma) and  
1025 thawed on ice. Samples were then Dounce homogenized with PestleAx20 and PestleBx20 before  
1026 transfer to a new tube, with the addition of additional lysis buffer. Following incubation on ice for  
1027 15 minutes, samples were then filtered using a 30  $\mu$ M MACS strainer (MACS strainer, Fisher  
1028 Scientific), centrifuged at 500xg for 5 minutes at 4°C using a swinging bucket rotor  
1029 (Sorvall Legend RT, Thermo Fisher), and then pellets were washed with an additional 1 mL cold  
1030 lysis buffer and incubated on ice for an additional 5 minutes. Lysates were combined with 1.8ml  
1031 of a 1.8M sucrose solution (Nuclei PURE Sucrose Buffer, Sigma) containing 1mM DTT and  
1032 0.2U RNase inhibitor and mixed by inversion. Samples were then layered on top of a 1.8M  
1033 sucrose layer to form a gradient and centrifuged at 30,000xg for 45min at 4°C using a swinging

1034 bucket rotor. Supernatant was removed, and nuclei pellets were resuspended in 1ml of a 1XPBS  
1035 wash buffer containing 1% BSA and 0.2U RNase inhibitor. Samples were centrifuged again at  
1036 500xg for 5 minutes at 4°C and supernatant removed. Nuclei were resuspended in 0.5ml wash  
1037 buffer and counted using Countess (Life Technologies) prior to 10xGenomics protocol. For  
1038 samples that were enriched using flow cytometry, nuclei were stained with 20 µg/ml DAPI for 30  
1039 minutes on ice with occasional mixing. Nuclei were centrifuged at 500xg for 5minutes at  
1040 4C. Supernatant was removed, and pellet resuspended in 800 µl of a 1XPBS wash buffer  
1041 containing 1% BSA, 1mM EDTA and 0.2U RNase inhibitor. Nuclei were sorted using the BD  
1042 Influx by first gating on forward/side scatter then on DAPI positive nuclei. Collected nuclei were  
1043 centrifuged then resuspended in ~200ul 1XPBS wash buffer containing 1% BSA and  
1044 0.2U RNase inhibitor and counted using Countess (Life Technologies) prior to 10xGenomics  
1045 protocol.

1046  
1047 **Library preparation and NovaSeq Sequencing:** Libraries were prepared according to  
1048 10xGenomics protocol using the Chromium Next GEM Single Cell 3' Reagents Kit V3.1 (Dual  
1049 Index) for encapsulation, mRNA capture, cDNA synthesis/amplification and library  
1050 construction. Final libraries were quantified using the DNA High Sensitivity Kit (Agilent  
1051 Bioanalyzer 2100) and Qubit 2.0 (Life Technologies). Libraries were diluted to 1.5nM then  
1052 pooled prior to sequencing on the Illumina NovaSeq6000. UMI count matrices generated  
1053 by Cellranger V3.0.2.

1054  
1055 **Data Preprocessing:** Summary information for final UMI count matrices for nuclei by individual  
1056 sample and sequencing data are presented in (Sup Fig 5A and C). Count matrices together with  
1057 nucleus barcodes and gene labels were loaded with R version 3.6.1/RStudio for sample integration  
1058 and unsupervised clustering using Seurat Package version 3.1. For Quality Control (QC), nuclei  
1059 were filtered following standard protocols based on examination of violin plots. Cutoffs were used,  
1060 filtered matrices were then individually log-normalized by sample according to standard Seurat  
1061 workflows. After quality filtering, total nuclei were included in the final data analysis.

1062  
1063 **Broad Cell Types Annotation:** Sample integration was performed in Seurat using  
1064 the FindIntegrationAnchors and Integrate Data functions for variable features. Following  
1065 integration and scaling according to Seurat package workflows, a range of clustering resolution  
1066 values were trialed prior to broad cell type annotation; UMAP, TSNE plots for broad types  
1067 annotation included. Cluster-level expression of major cell type markers was examined and used  
1068 to annotate cells contained within each cluster. Clustering resolution achieved separation and  
1069 consistency of cell type marker expression.

1070  
1071 **Differential Gene Expression and Pathway Enrichment Analysis:** Genes differentially  
1072 expressed between conditions within clusters may reveal pathway alterations specific to the  
1073 clustered cell type. To profile cluster-level pathway enrichment patterns, cluster-level  
1074 differentially expressed genes were identified using the Seurat Find Markers function with the  
1075 MAST package. Markers used for downstream functional analysis were those with adjusted p-  
1076 value < 0.05. Functional ontology analysis by cluster was performed for each cluster marker set  
1077 using IPA (enrichment adjusted p-value < 0.05).

1078

1079 **Total RNA seq:** mRNA sequence data were uploaded to a high-performance computing system  
1080 by PartekFlow software (v7.0, Partek, St. Louis, MO), adapter trimmed and remapped to mouse  
1081 genome, mm10 using STAR v2.5.3a aligner with default setting (Phred:20) for read mapping.  
1082 Statistical analysis was carried out using false discovery rate (FDR) correction through the  
1083 Benjamin-Hochberg method.

1084  
1085 **BrdU retention assay:** The assay was performed as described earlier (Takizawa et al., 2011),  
1086 briefly mice were i.p injected with 180 µg BrdU (sigma) and were fed water containing 800 µg/ml  
1087 BrdU and 4% glucose for 12days. Mice were then sacrificed organs (brain and spleen) were  
1088 removed and cells were isolated as described earlier. BrdU staining was performed using BrdU  
1089 labelling kit (BD). Cells from normal water fed mice were used as staining controls.

1090  
1091 **Mouse serum NF-L assay:** Quanterix Nf-L assays were performed in triplicate according to the  
1092 manufacturer's protocols using the Nf-Light<sup>TM</sup> Advantage kit on a single molecule array  
1093 (SIMOA<sup>TM</sup>) HD-X instrument (Quanterix, Lexington, MA).

1094  
1095 **Lipidomics:** Separation of glucosylceramides and galactosyl ceramides was performed by SFC-  
1096 MS/MS analyses at the MUSC Lipidomics Shared Resource. The equipment consisted of a Waters  
1097 UPC 2 system coupled to a Thermo Scientific Quantum Access Max triple quadrupole mass  
1098 spectrometer equipped with an ESI probe operating in the multiple reaction monitoring MRM  
1099 positive ion mode tuned and optimized for the Waters UPC 2 system.

1100  
1101 **Brain tissue slide preparation and MALDI-MS imaging:** Brain tissues were dissected, divided  
1102 sagittally into halves and immediately placed in Cryomolds (Tissue-Tek) containing 10% gelatin-  
1103 water (porcine skin, Sigma-Aldrich, #G1890), placed at 37C on the heating block and transferred  
1104 the cryo-mould in to dry-ice bath. Cryo-sectioning was performed at a chamber temperature of -  
1105 20 °C with 12 µm thickness. Sections were thaw-mounted onto the ITO coated side with barcoding  
1106 of MALDI IntelliSlides (Bruker, cat#1868957). Slides were stored in -80 °C until time for imaging.  
1107 An optical image for tissue sections was obtained using TissueScout scanner (Bruker). Once the  
1108 optical image was obtained, it was transferred to the HTX Sublimator (HTX Technologies, Chapel  
1109 Hill, NC) for matrix deposition. DHB (2,5-dihydroxybenzoic acid) was applied on the tissue  
1110 sections by sublimation, which was performed according to the HTX Sublimator setting (2ml of  
1111 40mg/mL DHB in acetone transfer solvent, 60 °C preheat temperature, 160 °C final temperature,  
1112 200 seconds). MALDI-MS imaging was performed in positive ion mode over a mass range of m/z  
1113 300-1300 on a Bruker timsTOF fleX mass spectrometer equipped with a 10kHz SmartBeam 3D  
1114 Nd:YAG (355nm) laser. Imaging was performed using a laser raster size of 20 µm custom setting,  
1115 20 µm scan range, with trapped ion mobility mode On (tims'ON<sup>2</sup>) for cross-sectional collision  
1116 (CCS) values with the following parameters (1/K<sub>0</sub> start at 0.90 V.s/cm<sup>2</sup> and end 1.70 V.s/cm<sup>2</sup>,  
1117 ramp time at 150 ms, accumulation time 40.0 ms, duty cycle 26.67%, ramp rate 6.50 Hz). Spectra  
1118 were accumulated from 400 laser shots with the laser power percentage adjusted using the highest  
1119 peak (m/z 760 positive ion mode) intensity between 10<sup>4</sup> and 10<sup>5</sup>, and the method was saved for all  
1120 subsequent acquisitions. For each image acquisition, the instruments were calibrated using ESI-L  
1121 Low concentration tuning mix (Agilent Technologies, cat #G1969-85000). Data were analyzed  
1122 using SCiLS Lab MALDI imaging software package, version 2021b, (Bruker) with data  
1123 normalized to the TIC. Targeted analysis for Hexceramides, sphingomyelins, and  
1124 phosphatidylcholines were analyzed for differential changes between animals.

1125

### 1126 **Lipid extraction of mouse serum**

1127 To quantify GlcSph, 7 $\mu$ L of mouse serum was aliquoted into a labeled 1.5mL Eppendorf tube  
1128 followed by 100  $\mu$ L of internal standard solution (12ng/mL dimethyl-psychose, 80% methanol,  
1129 20% acetonitrile with 10mM ammonium acetate and 1% formic acid). The samples were vortexed  
1130 for 5min and sonicated for 10min. The tubes were centrifuged at 13,000g for 5min at room temp.  
1131 The supernatant from each tube was transferred into a pre-labeled total recovery MS vial.  
1132 Calibration curves for GlcSph was prepared in a pooled control serum, and concentrations of  
1133 lysoGL1 are from 0.1–1000 ng/mL.

1134

### 1135 **Mass spectrometry analysis of GlcSph**

1136 Mouse serum was first tested on a HILIC- method to separate psychose (stereoisomer of GlcSph)  
1137 and GlcSph and confirm that psychose does not interfere with the quantitation of mouse serum  
1138 glucosylsphingosine levels (Wei-Lien Chuang et al). The supernatant was injected (5  $\mu$ L) into an  
1139 LC/MS/MS system comprised of an Acquity UPLC (Waters, Milford, MA) and Sciex Triple Quad  
1140 5000 mass spectrometer (Sciex, Toronto, Canada). The chromatographic separation was achieved  
1141 with an Waters Acquity BEH C18 column (2.1 \* 150 mm, 1.7  $\mu$ m) using mobile phases: (A) Water  
1142 with 0.1% formic acid, (B) 85:15 MeOH:ACN with 0.1% formic acid. The column is maintained  
1143 at 60 C. GlcSph is eluted with the following gradient: from 50% B to 99% B over 2 min, then the  
1144 mobile phase composition is hold constant for 1 min followed by a rapid return (0.1 min) to 50%  
1145 B maintained for 0.5 min. All experiments were carried out at a flow rate of 0.5 mL/min. Data is  
1146 analyzed in Analyst (AB Sciex, Toronto, Canada).

1147

### 1148 **Behavioral Studies:**

1149 Balance beam test: Evaluating fine motor coordination using balance beam (1mt) with 12mm  
1150 width resting 50 cm above the top of the pole. The time to cross each beam was recorded and  
1151 compared between mouse strains.

1152

### 1153 **Open Field:**

1154 Mouse locomotor behavior was assessed using the open field (Crusio, 2001). Mice were  
1155 individually placed on the 28x28 cm plate surrounded by plastic walls in a well-lit room and  
1156 allowed to freely explore for 10 min. Spatial statistic, total distance travel, area measure, and time  
1157 spent in the center of the square were quantified. The movements were recorded by a video  
1158 tracking system and stored on a computer.

1159

### 1160 **BODIPY staining:**

1161 Isolated total mice brain cells from nGD and age matched control mice were prepared (as  
1162 described in section “Brain tissue harvesting and cell preparation”) were stained with CD45,  
1163 CD11b and ACSA-2 were incubated in PBS with BODIPY 493/503 (1:1,000 from a 1 mg ml  
1164 stock solution in DMSO; Thermo Fisher) for 10 min at RT, washed twice in PBS, and BODIPY  
1165 intensity was analyzed on LSRII instrument (BD Biosciences).

1166

### 1167 **ROS assay:**

1168 To assess ROS generation in astrocytes and microglia from nGD mice, isolated total mice brain  
1169 cells were stained with CD45, CD11b and ACSA-2 followed by incubation in FACS buffer with

1170 CellROX Deep Red (1:500; Invitrogen) for 30 min at 37 °C, washed twice in FACS buffer, and  
 1171 CellROX Deep Red Intensity was analyzed on LSRII instrument (BD Biosciences).

1172  
 1173 **ApoE measurement:**

1174 Apoe levels in sera of GD patient were measured by ELISA using Abnova CAT # KA1031  
 1175 following manufacturer's instructions. A dilution of 1:400 sera was used.

1176  
 1177 **Quantification and Statistical analysis**

1178 Data were routinely presented as the mean ± SEM. Statistical significance was determined using t  
 1179 test using Bonferroni-Dunn correction for multiple comparisons. Differences between groups were  
 1180 analyzed using Student's t test using GraphPad Prism 8.0. For the Kaplan-Meier analysis of  
 1181 survival, the log-rank (Mantel Cox) test was performed.

1182  
 1183 **Study approval**

1184 All animal experiments were conducted in compliance with institutional regulations under  
 1185 authorized protocol (2016-10872) approved by the Institutional Animal Care and Use Committee.  
 1186 The study was approved by the Human Investigations Committee of Yale School of Medicine and  
 1187 written informed consent was received prior to participation.

1188

| Reagents                | Provide supplier name  | Catalogue number | Clone                |
|-------------------------|------------------------|------------------|----------------------|
| CD11b                   | BD Biosciences         | 583553           | M1/70                |
| CD11b                   | BD Biosciences         | 552850           | M1/70                |
| ACSA-2                  | Miltenyi Biotech       | 130-123-284      | IH3-18A3             |
| CD45                    | Biologend              | 103133           | 30-F11               |
| NK1.1                   | BD Biosciences         | 562864           | PK136                |
| CCR2                    | R and D                | FAB5538F         |                      |
| CD3                     | Biologend              | 100241           | <a href="#">17A2</a> |
| NK1.1                   | Biologend              | 108753           | PK136                |
| 1-A/1-E                 | Biologend              | 107639           | M%/114.152           |
| CD4                     | BD Biosciences         | 563790           | GK1.5                |
| CD4                     | BD Biosciences         | 558107           | RM4-5                |
| Gr-1                    | Biologend              | 108440           | RB6-8c5              |
| Ly-6C                   | Invitrogen             | 47-5932-82       | HK1.4                |
| CD64                    | Biologend              | 139306           | X54-5                |
| B220                    | eBioscience            | 47-0452-80       | RA3-6B2              |
| CD8a                    | eBioscience            | 56-0081-82       | 53-6.7               |
| Brdu Flow kit           | BD Pharmingen          | 51-9000019AK     |                      |
| 5-Bromo-2'-deoxyuridine | Cayam Chemical Company | 15580            |                      |
| Cell Rox Deep Red       | Invitrogen             | C10422           |                      |
| IL-1Beta                | Invitrogen             | 17-7114-80       | NTTEN3               |

1189 **Resource availability**

1190 **Lead contact**

1191 Further information and requests for reagents should be directed to and will be fulfilled by the lead  
1192 contact, Pramod Mistry (pramod.mistry@yale.edu).

1193 **Materials availability**

1194 All materials in this study are available upon request.

1195 **Data and code availability**

1196 All data produced in this study are included in this published article and the supplemental  
1197 information. Any additional information required to reanalyze the data reported in this paper is  
1198 available from the lead contact upon request.

1199

1200 **Acknowledgements:**

1201 We thank Dr Stefan Karlsson for generously sharing Inl/Inl, nGD mice. We also thank Dr.  
1202 Sreeganga Chandra for suggestions on mice behavioral tests.

1203 **Funding:**

1204 CSB: Yale Liver Center P30DK034989, pilot project grant.

1205 PKM: Research grant from Sanofi Genzyme; other support includes R01NS110354.

1206 **Author contributions:**

1207 C.S.B, S.N. conceived the project, performed, designed experiments and analyzed data; G.B, J.R  
1208 involved in mouse generation and maintenance; E.P, S. M performed bioinformatics analysis; J.S  
1209 performed the snRNA-seq analysis; V.D.J performed mice behavioral studies; T.N, performed  
1210 MALDI-MS imaging; L.G, M.K, H.W performed Quanterix assays and lipidomics in mice and  
1211 human serum. M.D, Z.B and K.L provided helpful insights. P.K.M. conceived the project,  
1212 supervised the study and analyzed data; C.S.B, S.N and P.K.M wrote the manuscript with input  
1213 from all authors.

1214 **Disclosures**

1215 PKM receives research funding and travel support from Sanofi Genzyme.

1216 JG, ET, T-H.N, LG, MK, HW, MD, ZB and KK are employees of Sanofi Genzyme.



Fig 1A

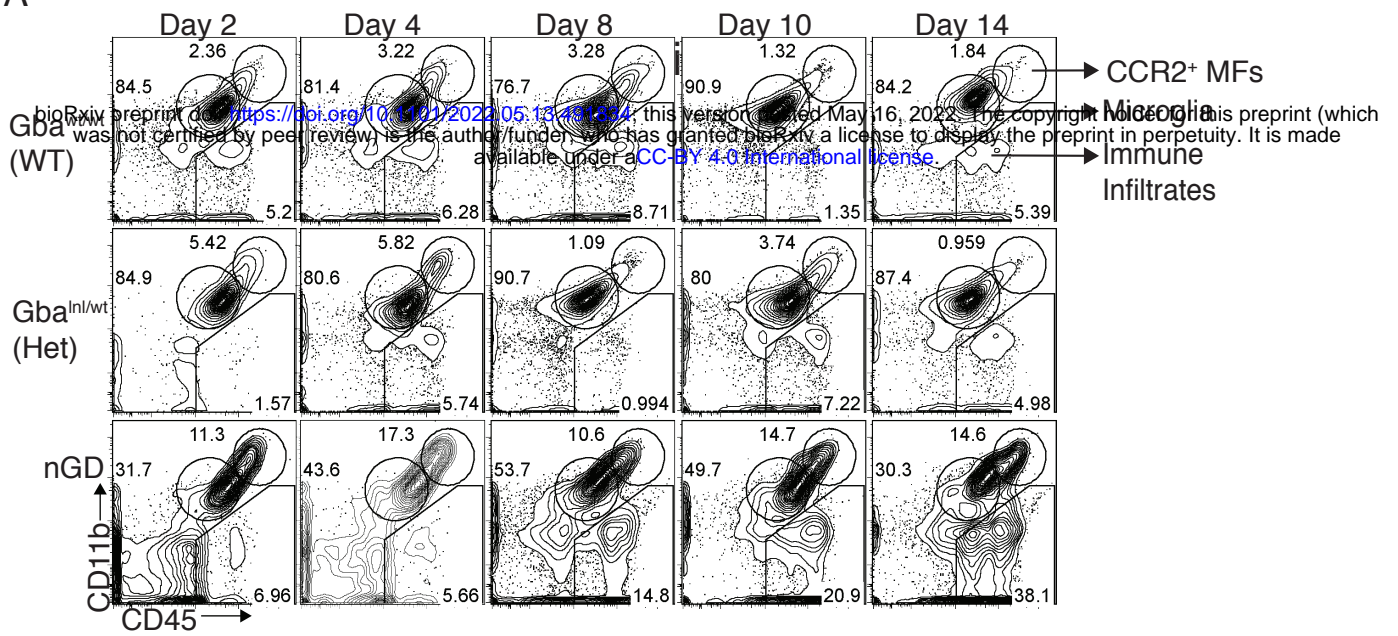

Fig 1B

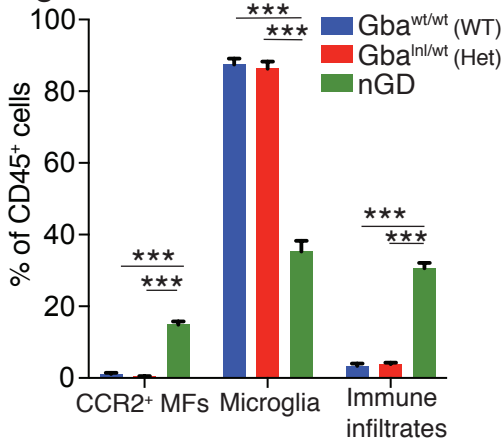

Fig 1C

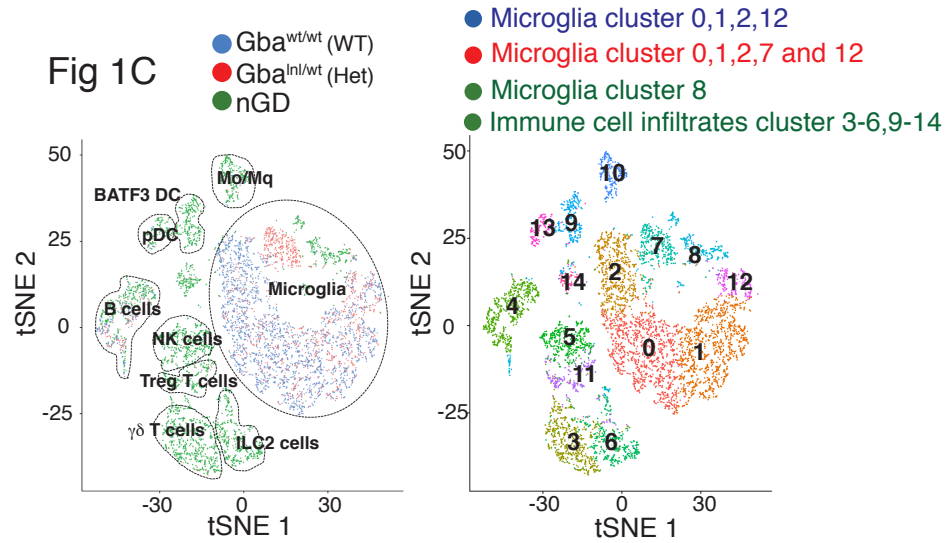

Fig 1D

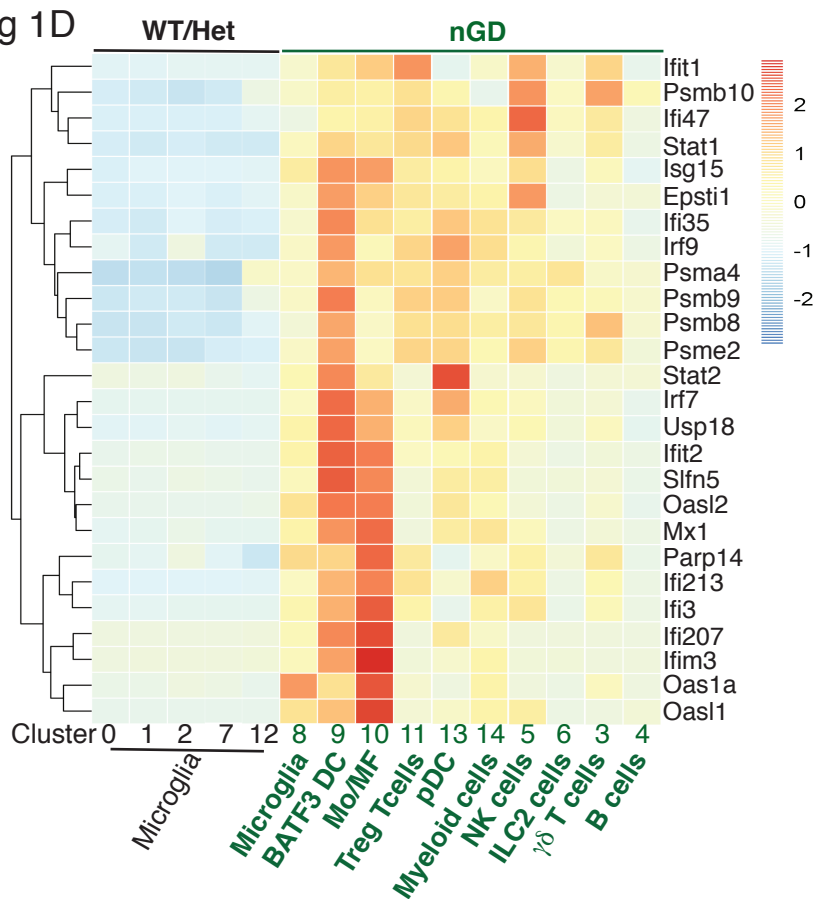

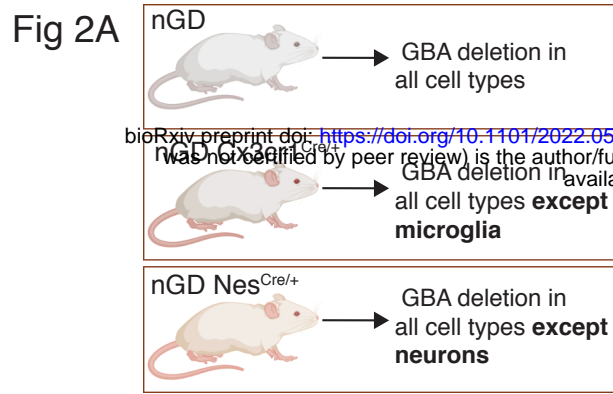

bioRxiv preprint doi: <https://doi.org/10.1101/2022.05.13.491834>; this version posted May 16, 2022. The copyright holder for this preprint (which was not certified by peer review) is the author/funder, who has granted bioRxiv a license to display the preprint in perpetuity. It is made available under aCC-BY 4.0 International license.

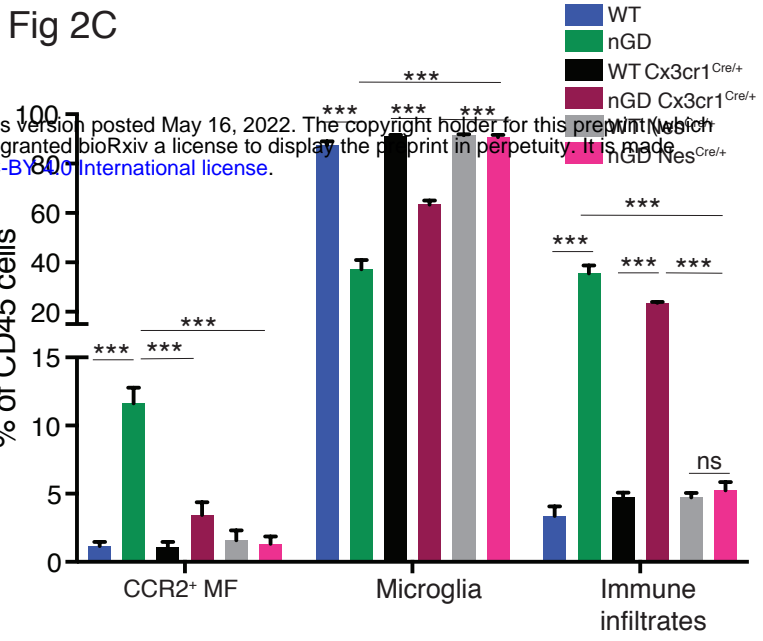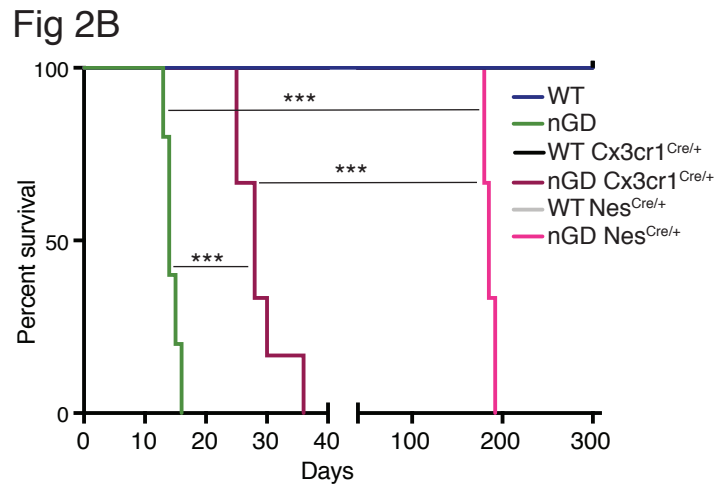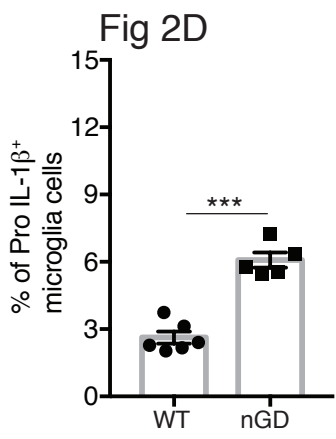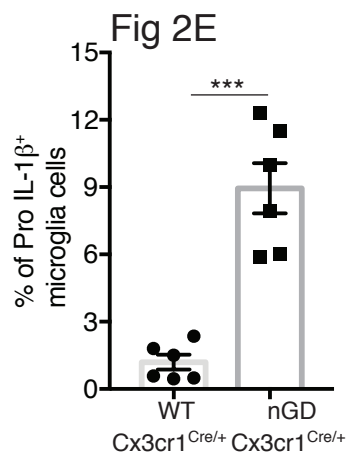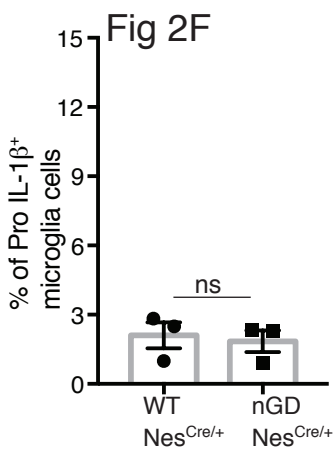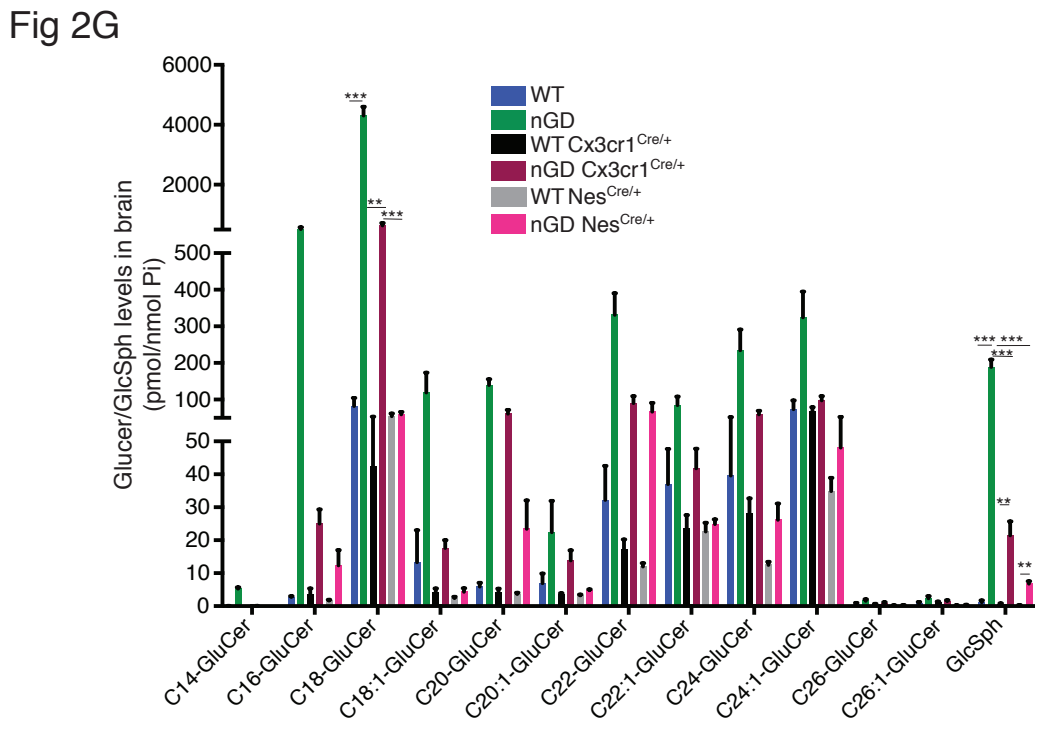

**Fig 3A**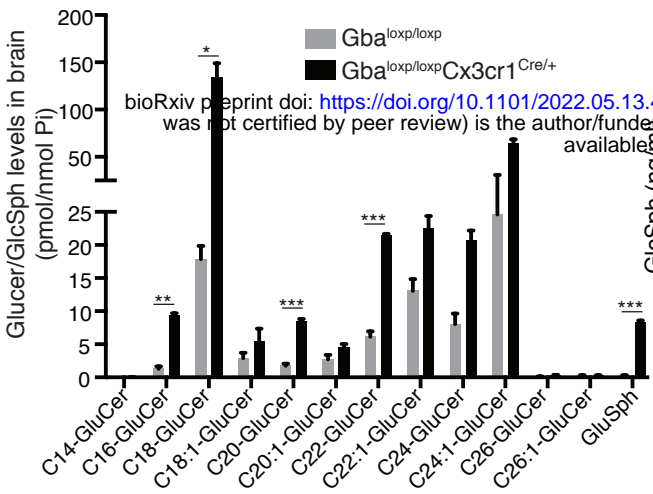**Fig 3B**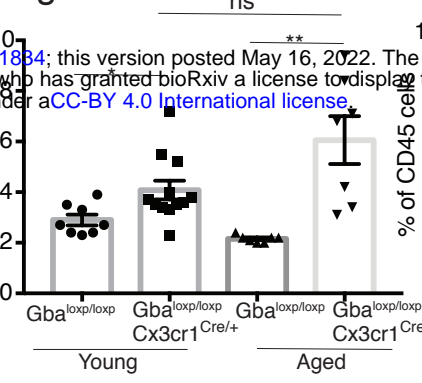**Fig 3C**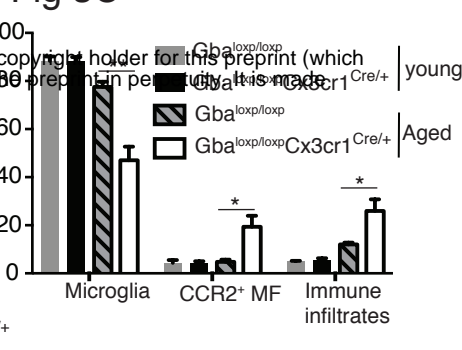**Fig 3D**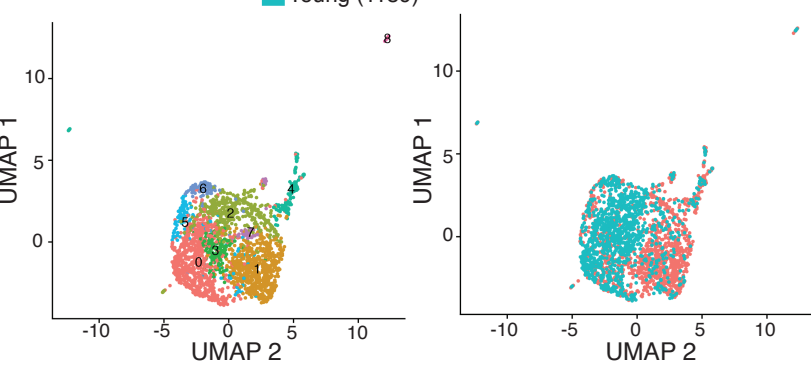**Fig 3E**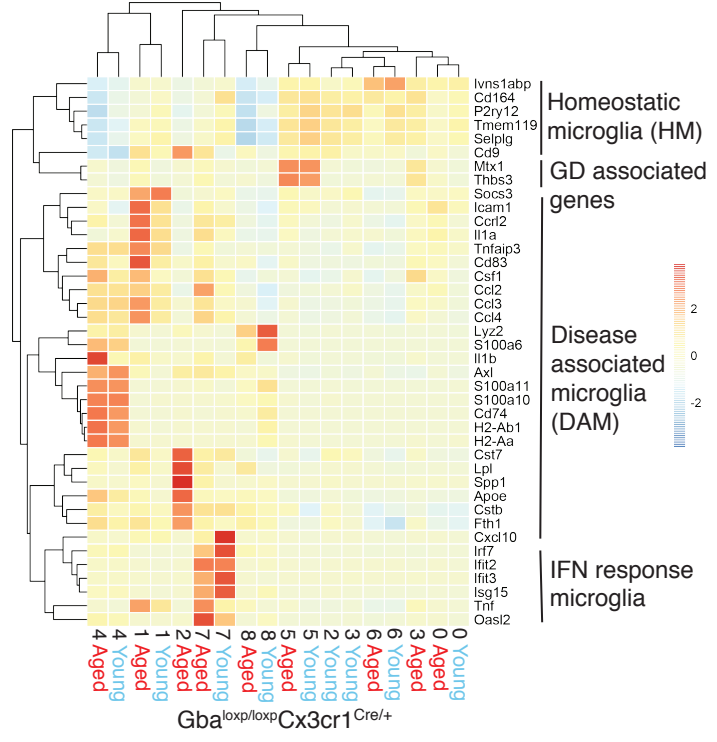**Fig 3F**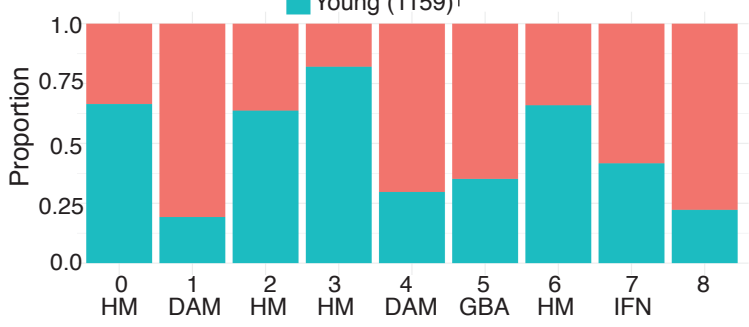**Fig 3G**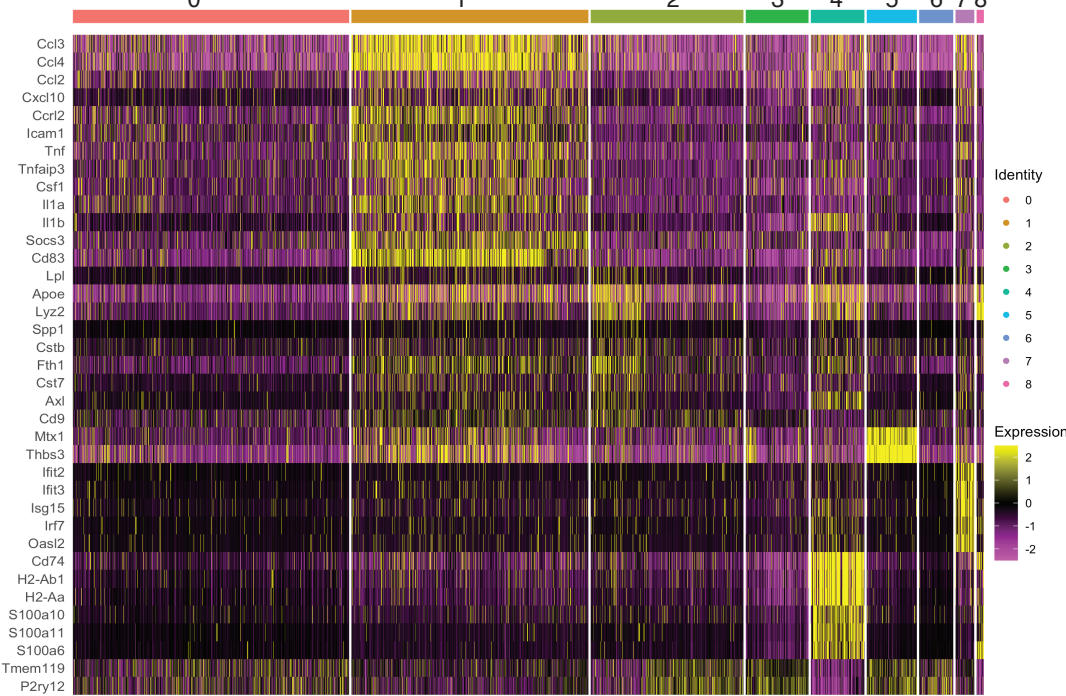

Fig 4A

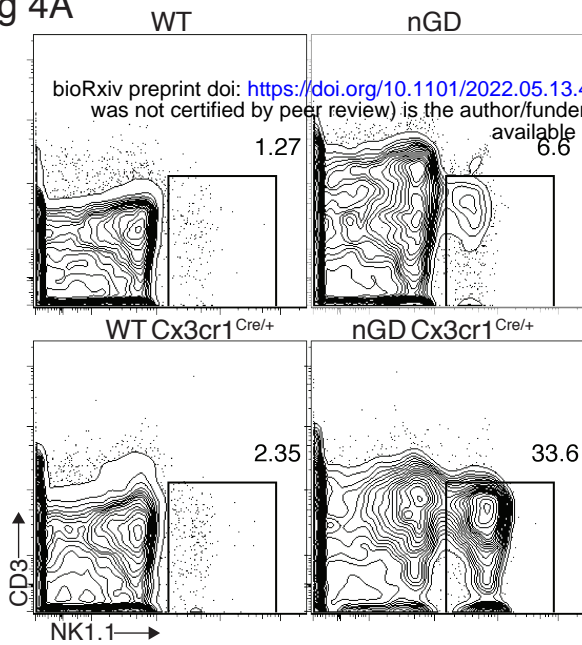

Fig 4D

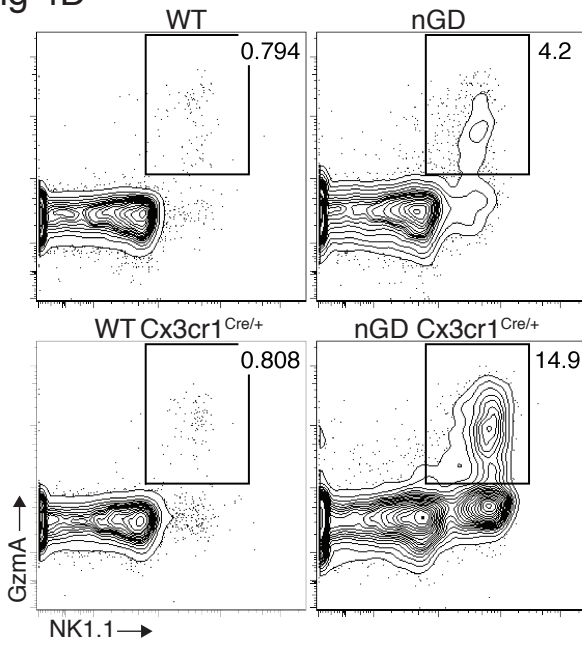

Fig 4B

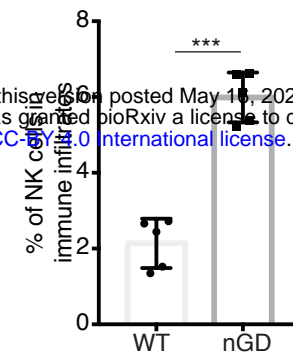

Fig 4C

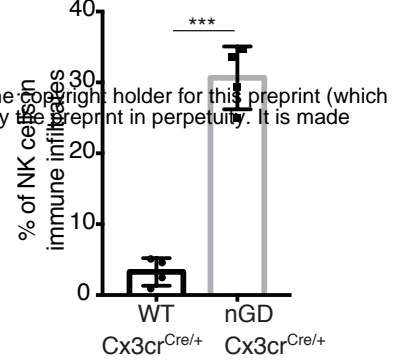

Fig 4E

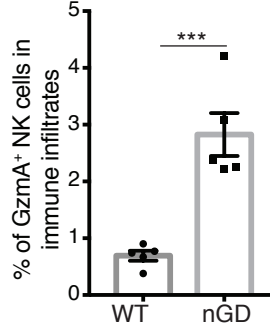

Fig 4F

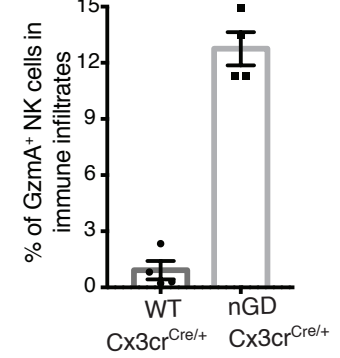

Fig 4G

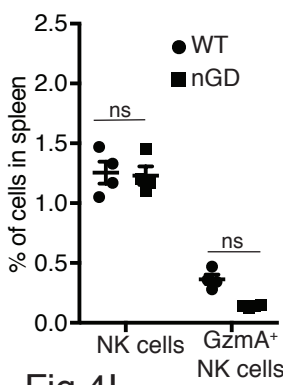

Fig 4H

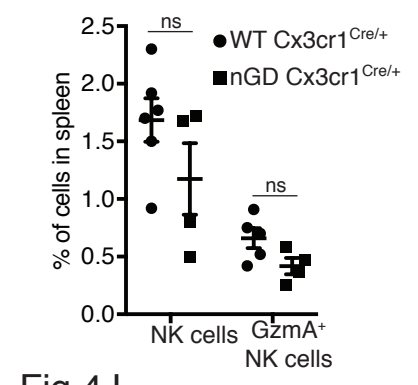

Fig 4I

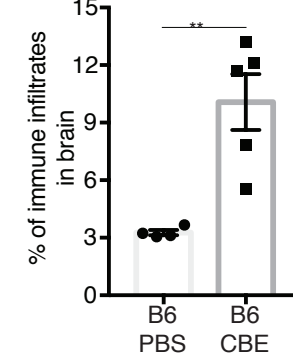

Fig 4J

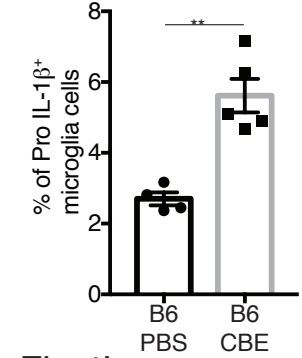

Fig 4K

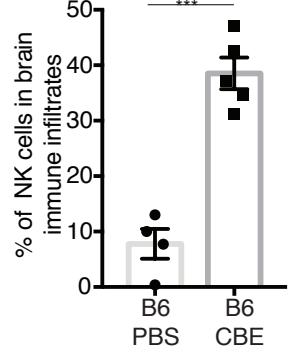

Fig 4L

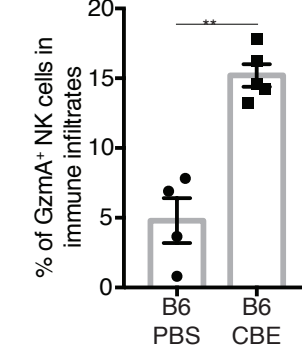

**Figure 5**

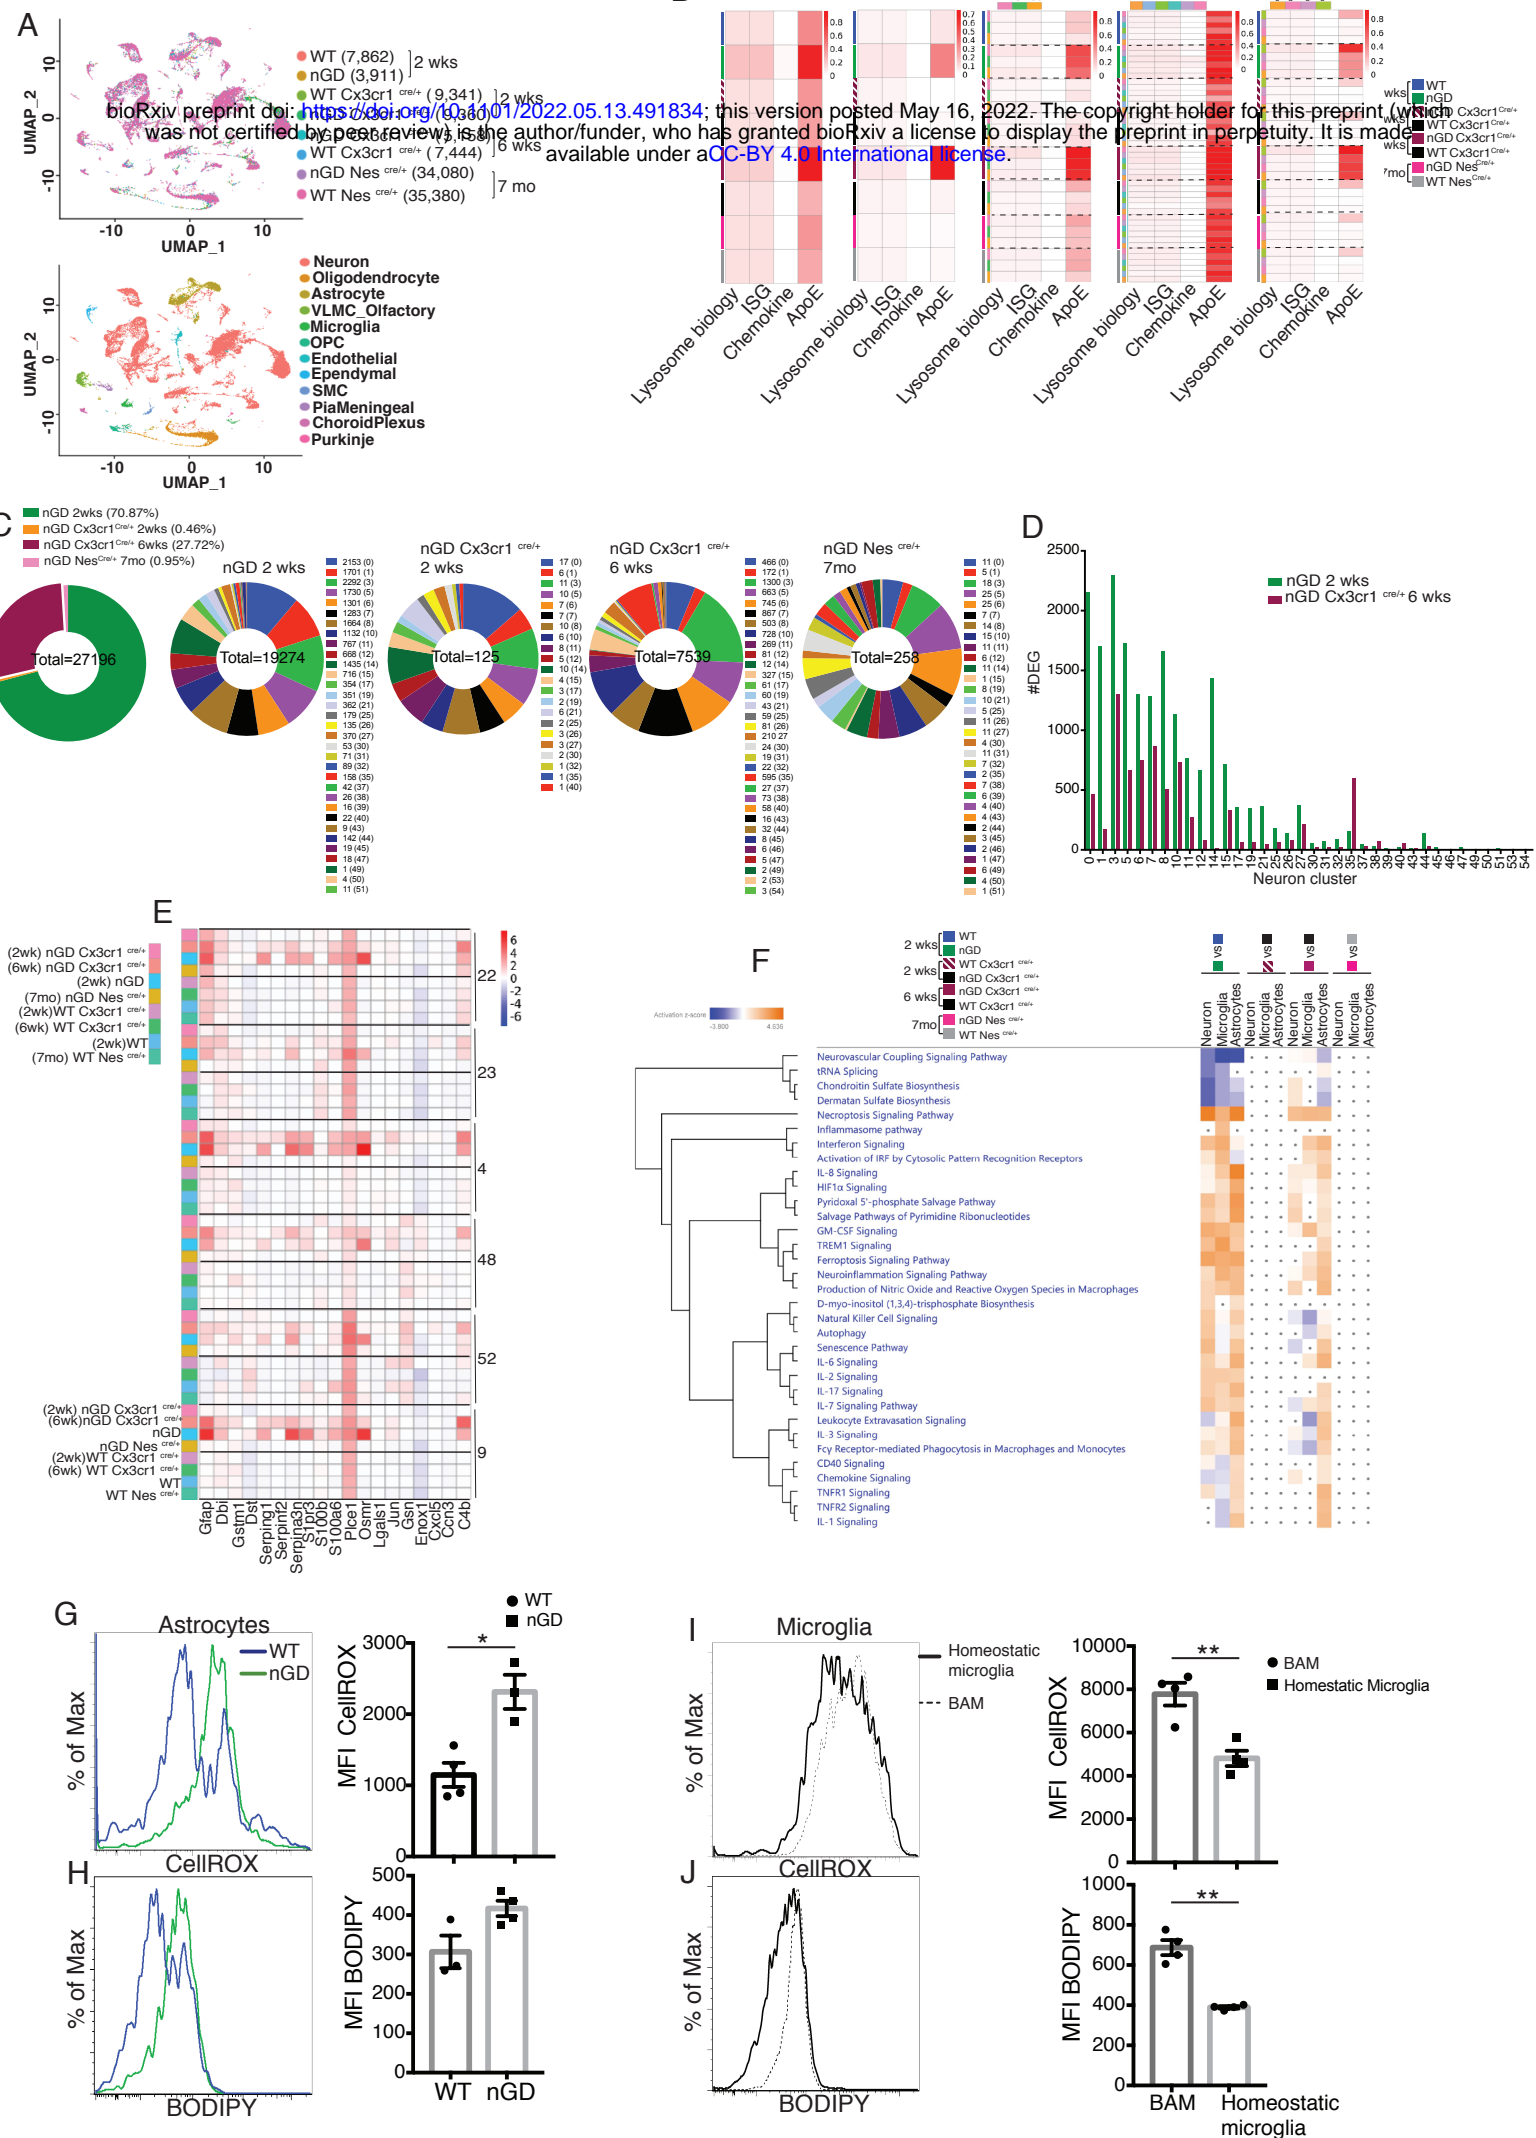

Fig 6A

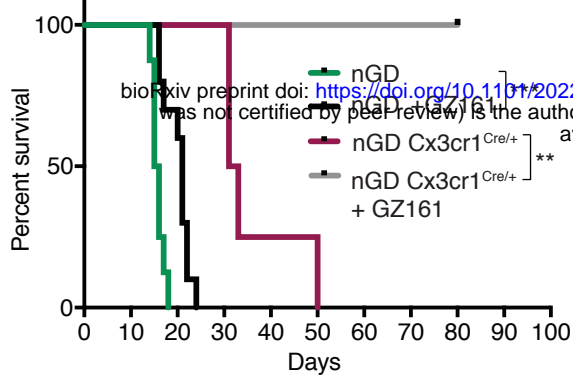

Fig 6B

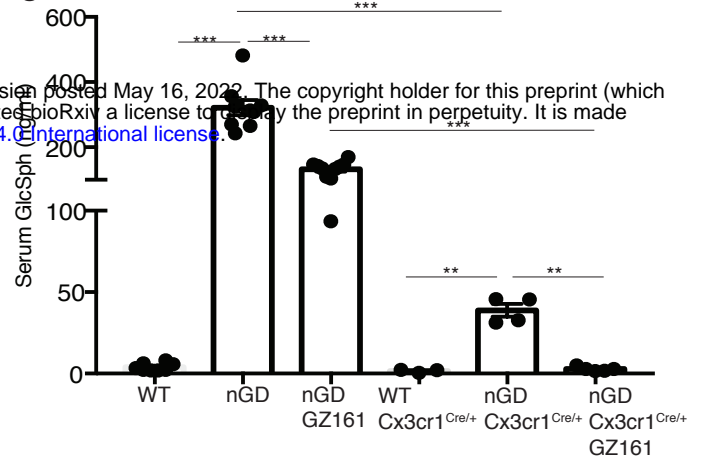

Fig 6C

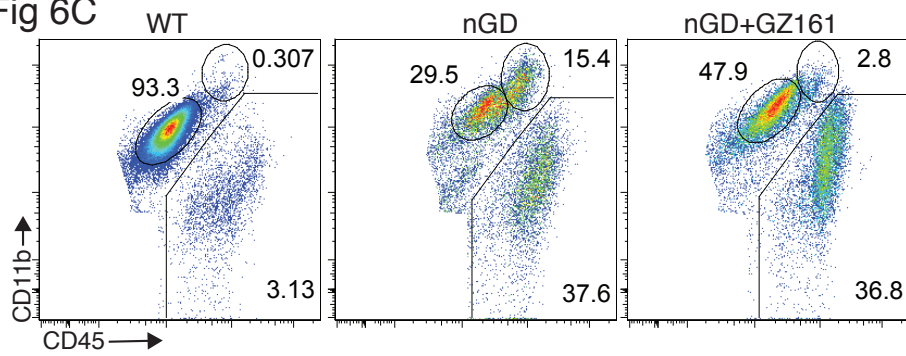

Fig 6D

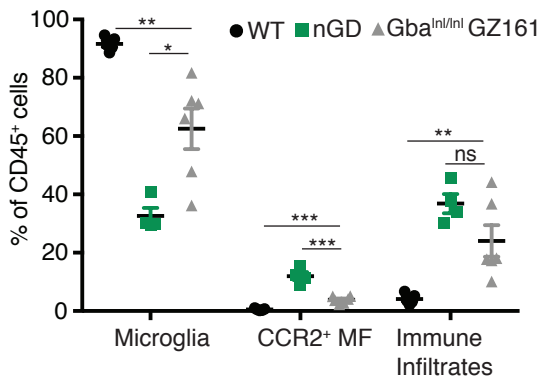

Fig 6E

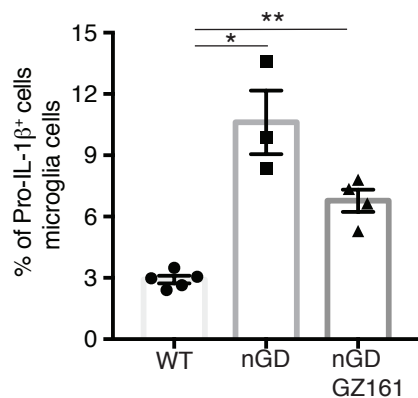

Fig 6F

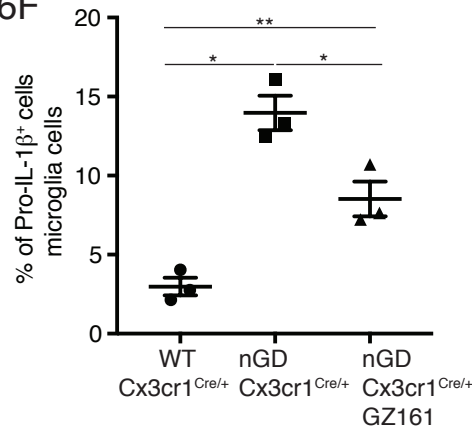

Fig 6G

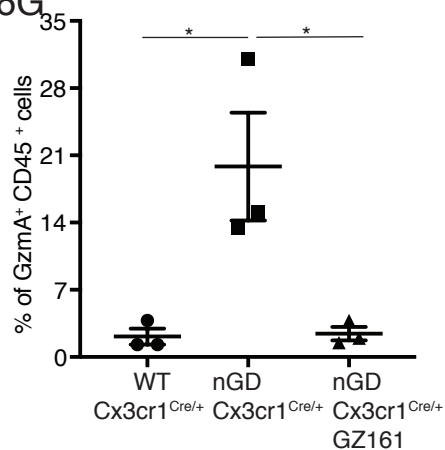

Fig 6H

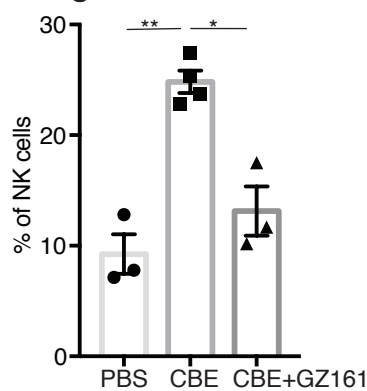

Fig 7A

*Gba*<sup>loxp/loxp</sup>      *Gba*<sup>loxp/loxp</sup> Cx3cr1<sup>Cre/+</sup>      *Gba*<sup>loxp/loxp</sup> Cx3cr1<sup>Cre/+</sup> + GZ161

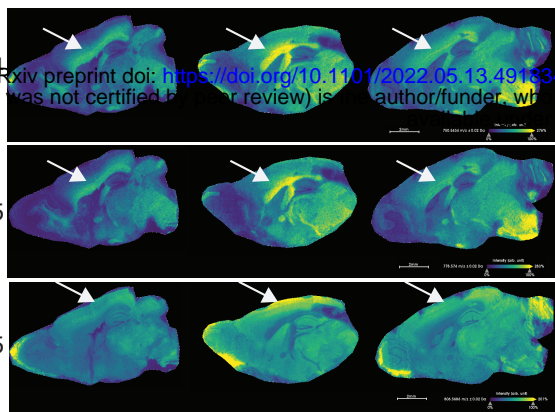

Fig 7B

CD45<sup>+</sup> cells

Microglia

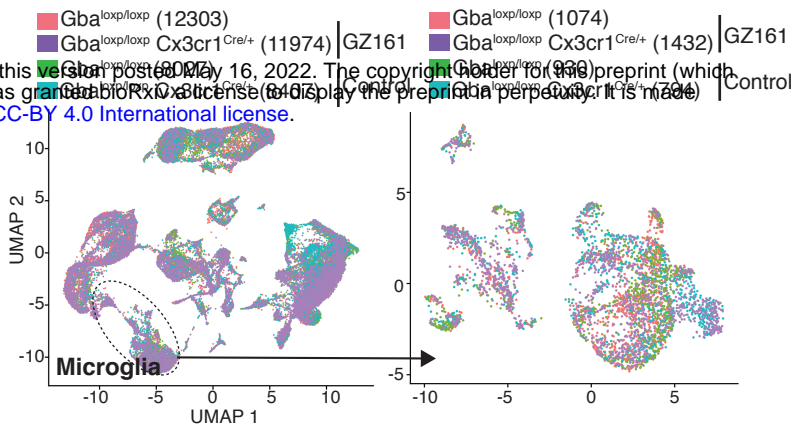

Fig 7C

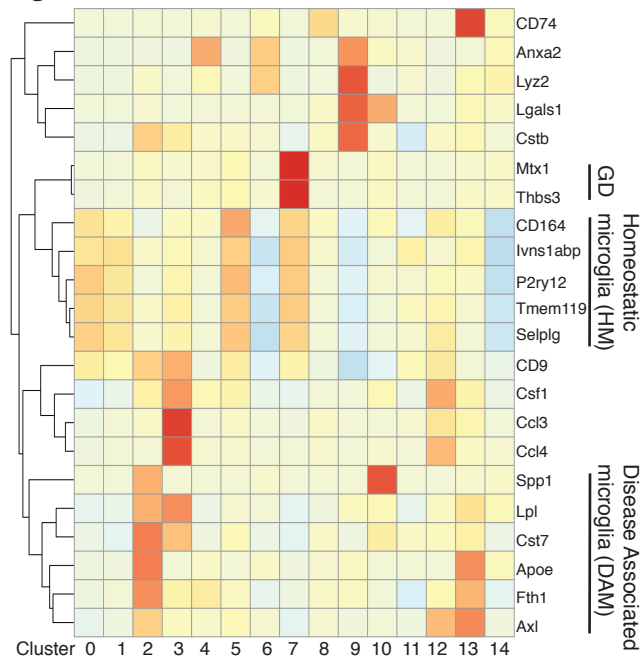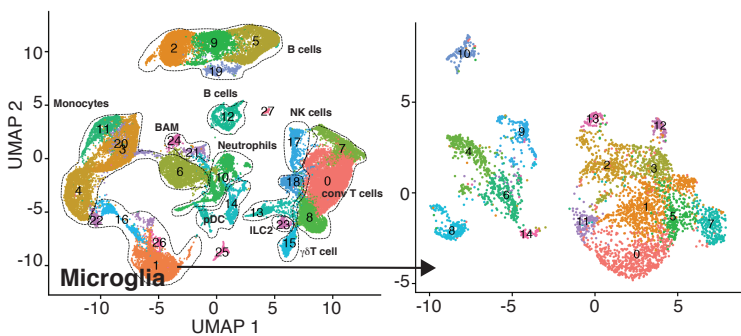

Fig 7D

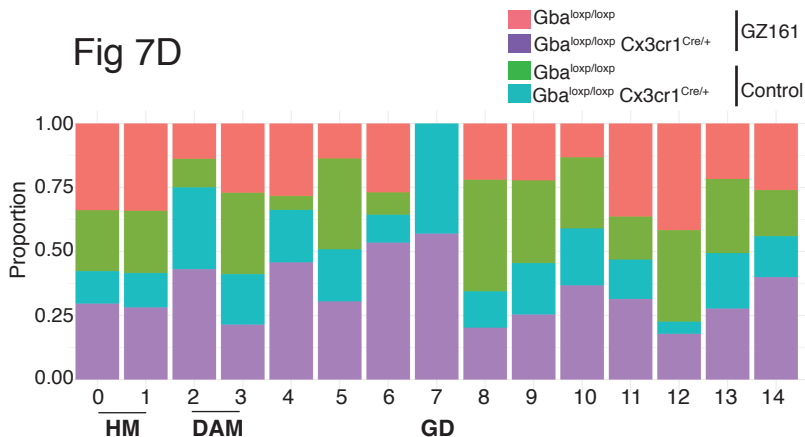

Fig 7E

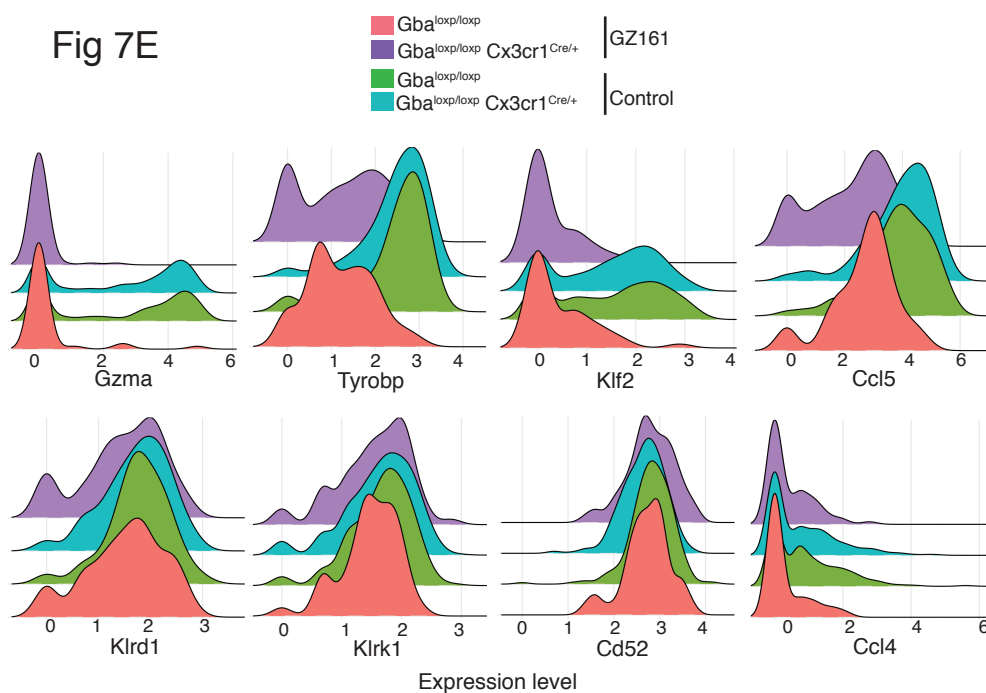

Fig 8A

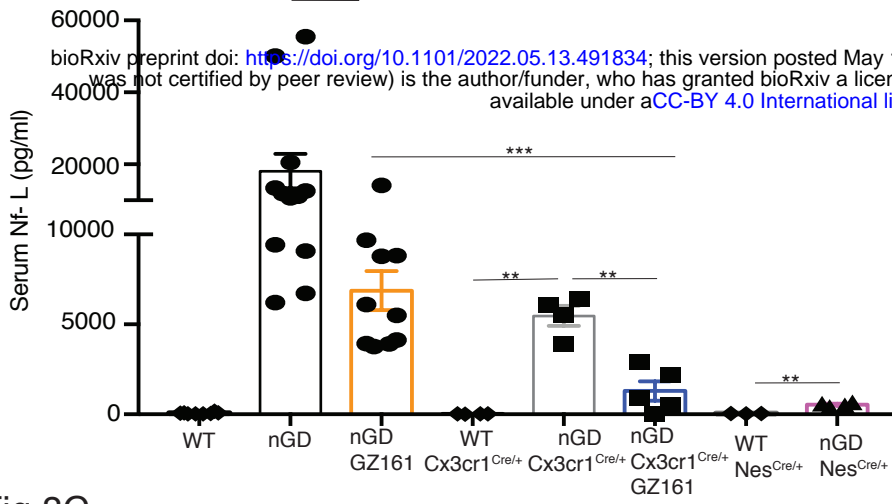

Fig 8B

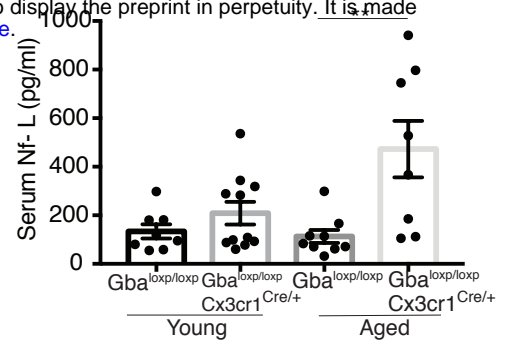

Fig 8C

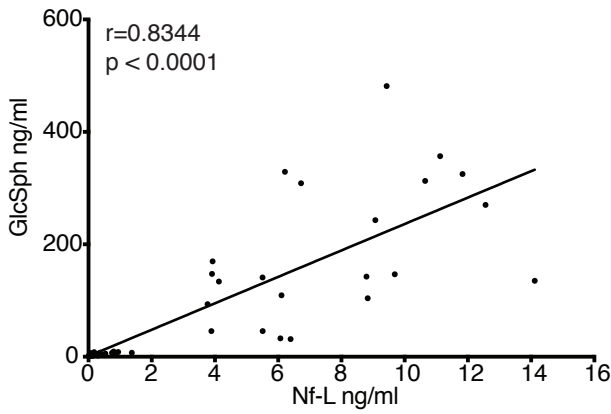

Fig 8D

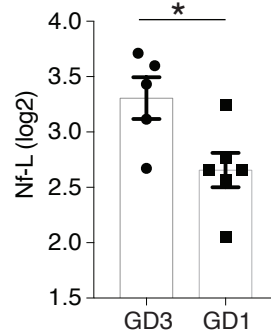

Fig 8E

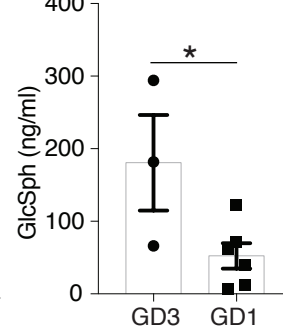

Fig 8F

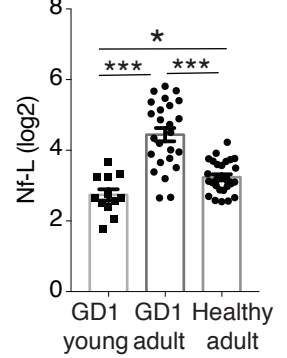

Fig 8G

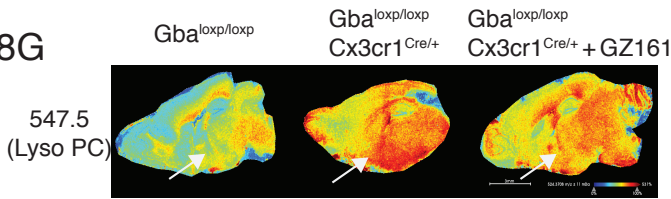

Fig 8H

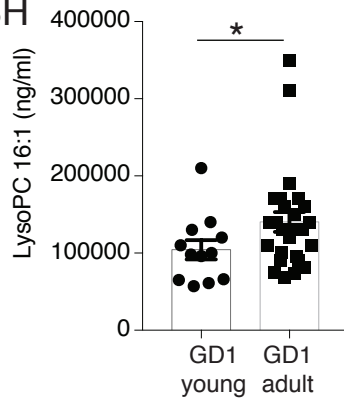

Fig 8I

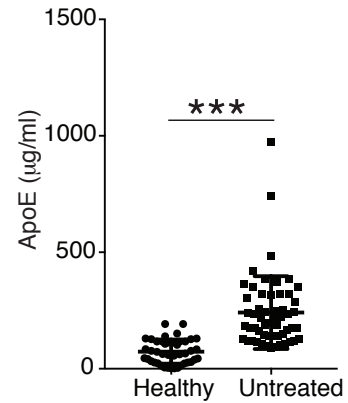

Fig 8J

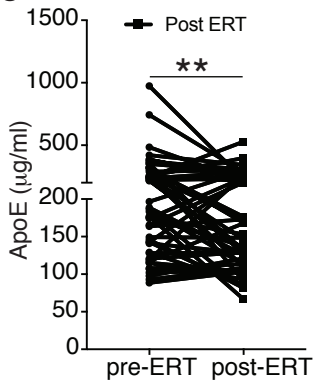

Fig 8K

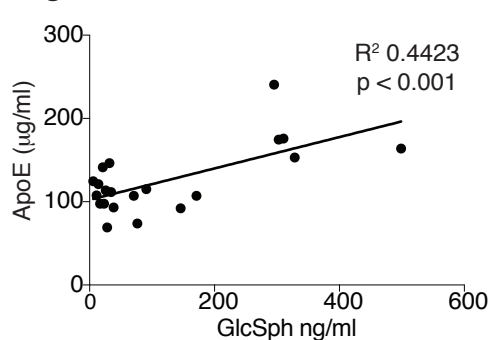

Fig 8L

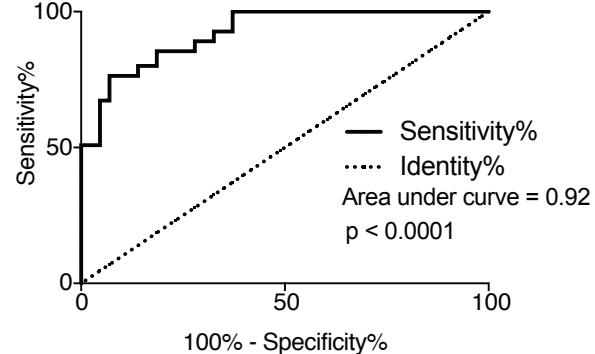



Suppl Fig 1A

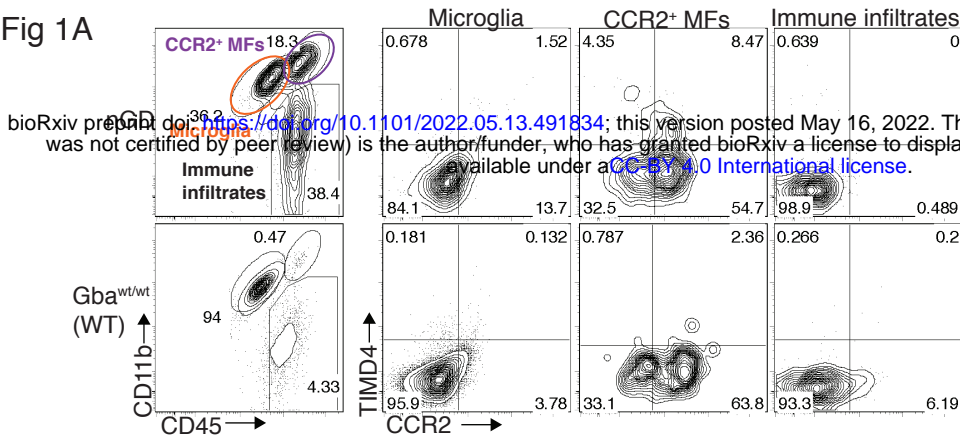

Suppl Fig 1B

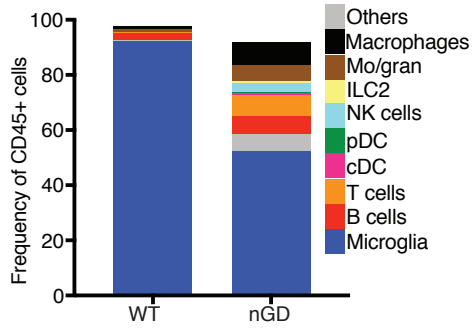

Suppl Fig 1C

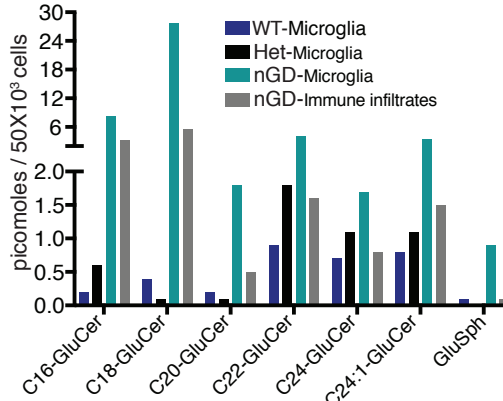

Suppl Fig 1D

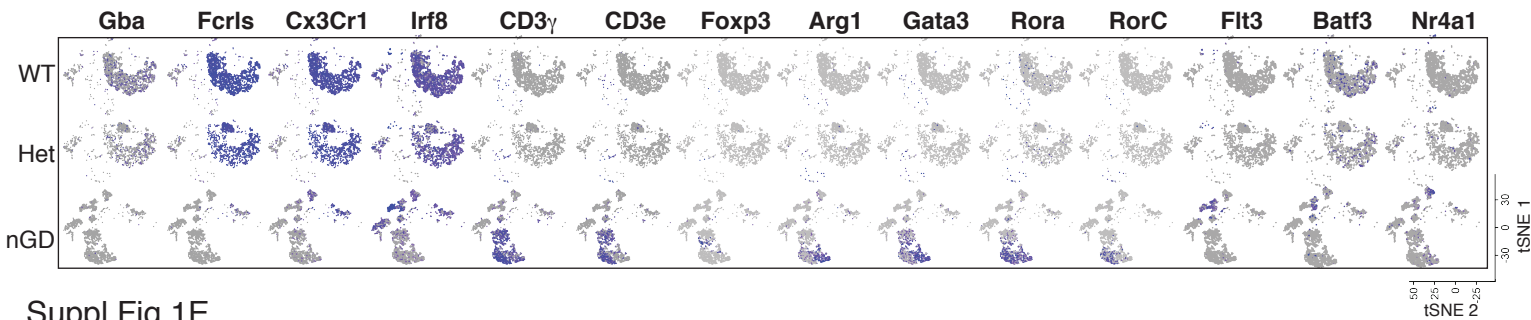

Suppl Fig 1E

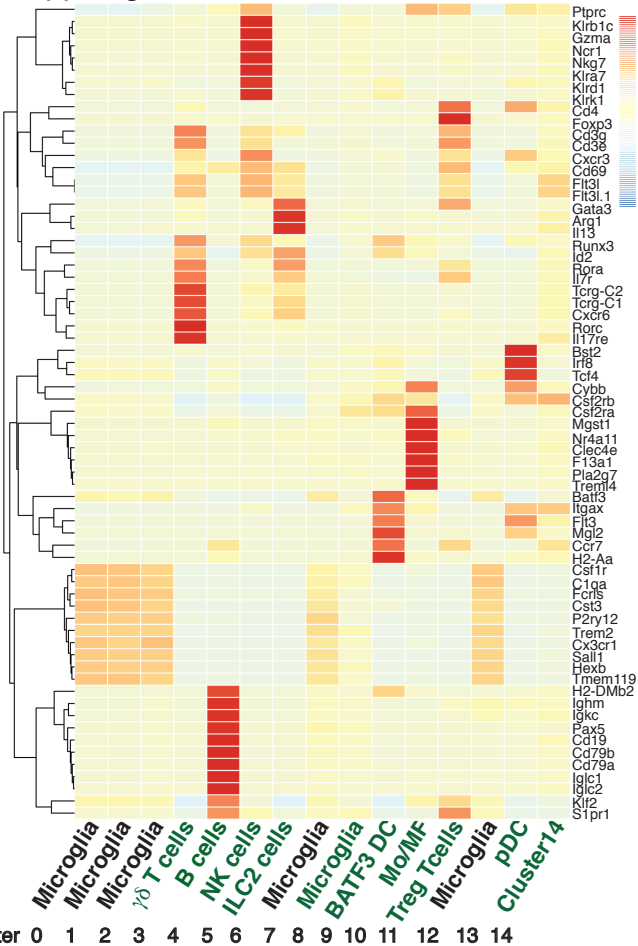

Figure S1. Loss of *Gba* induces microglial activation and immune cell infiltration in neuronopathic GD (*Gba* Inl/Inl) brain. A. Representative FACS plot showing CCR2+ MFs, microglia and immune infiltrates in the whole brain of nGD versus control mice brain. B. Bar graph shows the frequency of different immune cells (denoted on right) in the immune infiltrates obtained from neuronopathic GD (nGD; *Gba*Inl/Inl) and control mice brain respectively. C. Bar graph shows quantitative analysis of total GluCer species and GlcSph levels by LC-ESI-MS/MS in flow sorted microglia cells obtained from *Gba*wt/wt, *Gba*Inl/wt and nGD brains and on immune infiltrates isolated from nGD brain. D. t-SNE plot demonstrating annotations of different clusters identified using expression of signature genes. E. Hierarchical heatmap representing the differentially expressed genes in each identified cluster.

Suppl Fig 2A

bioRxiv preprint doi: <https://doi.org/10.1101/2022.05.13.491834>; this version posted May 16, 2022. The copyright holder for this preprint (which was not certified by peer review) is the author/funder, who has granted bioRxiv a license to display the preprint in perpetuity. It is made available under aCC-BY 4.0 International license.

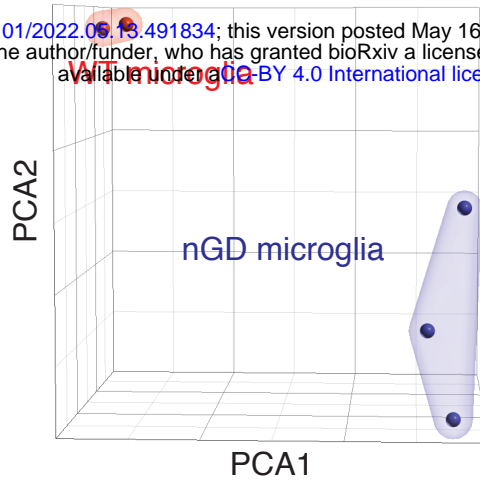

Suppl Fig 2B

Day 15

Z-score  
-1.33 0 1.62

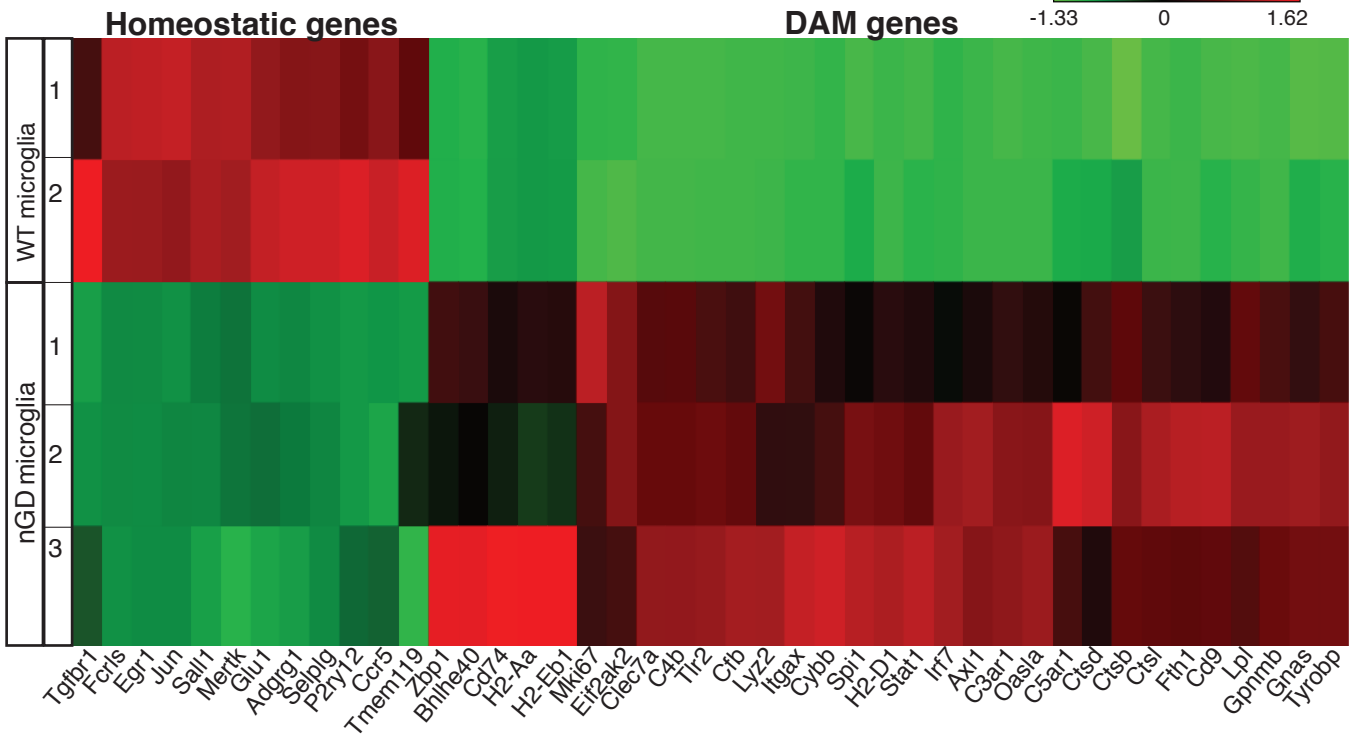

Suppl Fig 2C

Day 15

Z-score  
-1.17 0 1.56

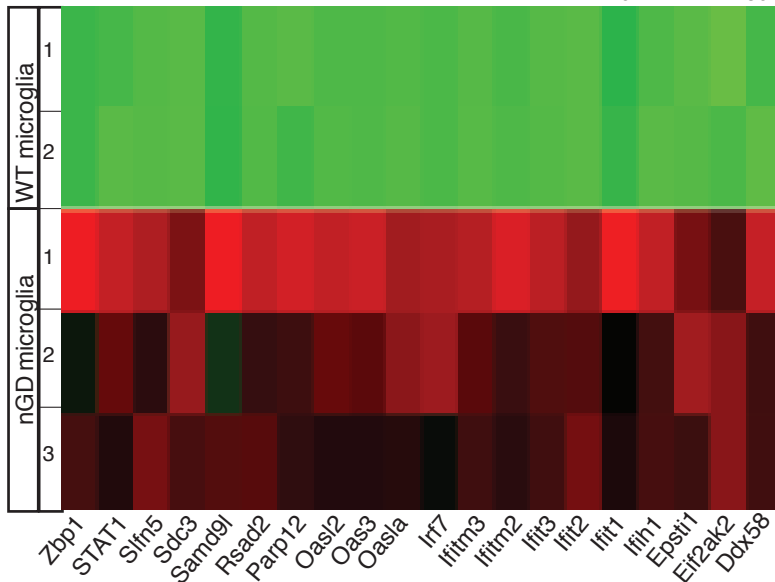

Figure S2. Loss of *Gba* disrupts microglial homeostasis and induces damage associated microglia (DAM) phenotype A. Principal component analysis of gene expression profiles of microglia isolated from nGD brain and their controls. Each point represents a single mouse. B. A heat map showing the differential expression of homeostatic and Disease associated microglial (DAM) genes in isolated-microglia from nGD and control mice brain respectively. C. A heat map of interferon signature genes (ISG) genes in isolated-microglia from nGD and control mice brain respectively. Colors indicate upregulated (red) and downregulated genes (green).

### Suppl Fig 3A

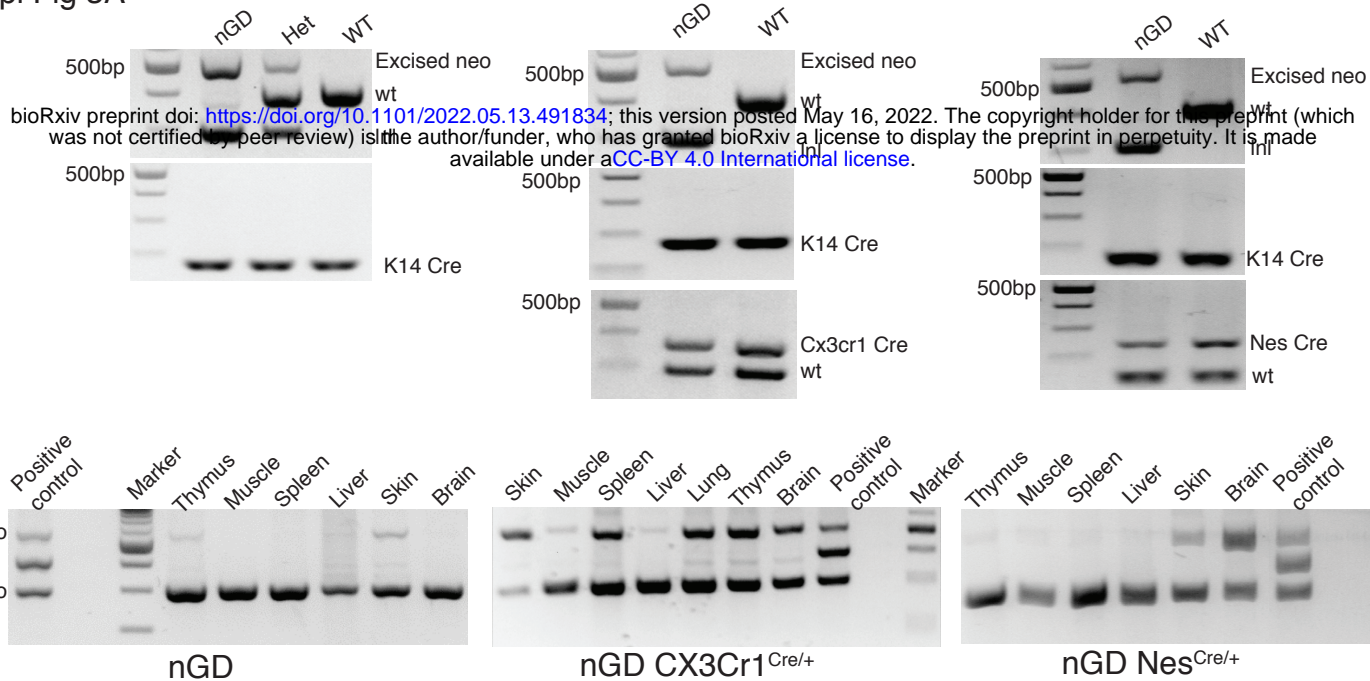

### Suppl Fig 3B

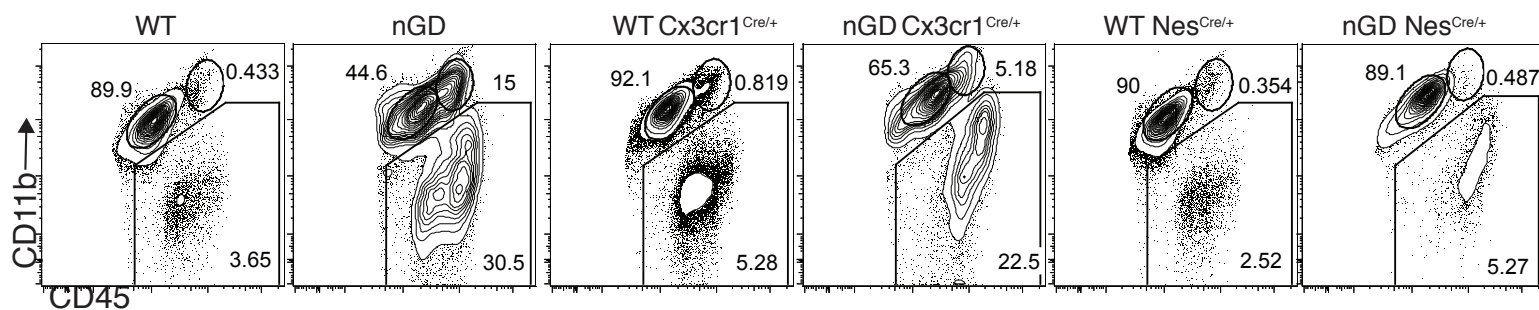

### Suppl Fig 3C

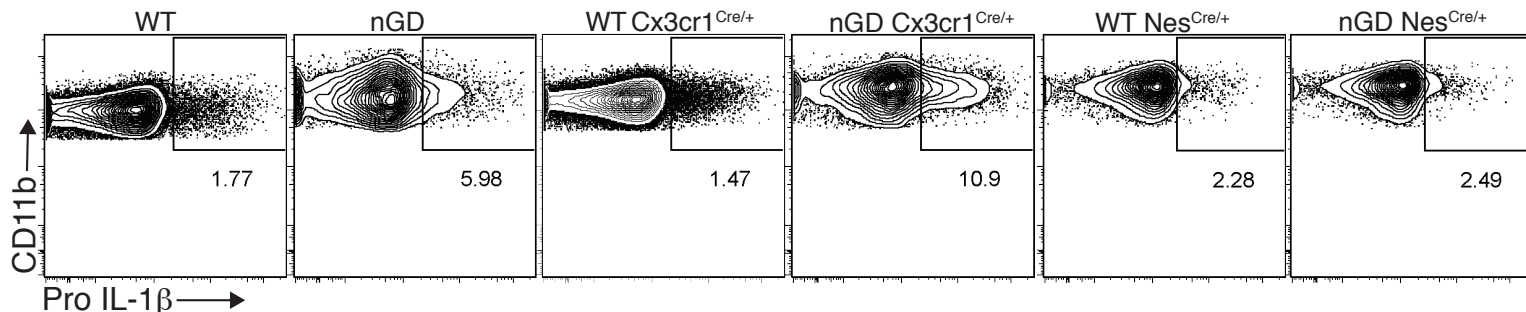

Figure S3. Restoring Gba function in microglia and neurons of enhances nGD mice survival.

A. Splicing of mRNA causes GBA1 deficiency in nGD mice. K14-mediated expression of Cre enabled removal of the loxp-neo-loxp cassette in the skin tissue of the nGD mice (left and bottom panel), Cx3cr1 Cre enabled removal of the loxp-neo-loxp cassette in different tissues (middle and bottom panel) and Nestin Cre enabled removal of the loxp-neo-loxp cassette in brain (right and bottom panel). B. Representative FACS plot showing CCR2<sup>+</sup> MFs, microglia and immune infiltrates in the whole brain of nGD, nGD Cx3cr1<sup>Cre/+</sup> and nGD Nes<sup>Cre/+</sup> mice versus control mice brain. C. Representative intracellular staining for Pro-IL-1 $\beta$  expression in microglia isolated from nGD, nGD Cx3cr1<sup>Cre/+</sup> and nGD Nes<sup>Cre/+</sup> and control mice analyzed by FACS.

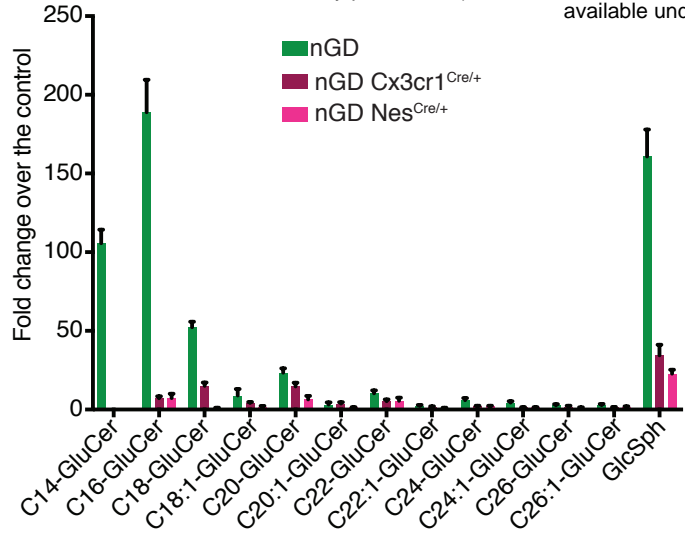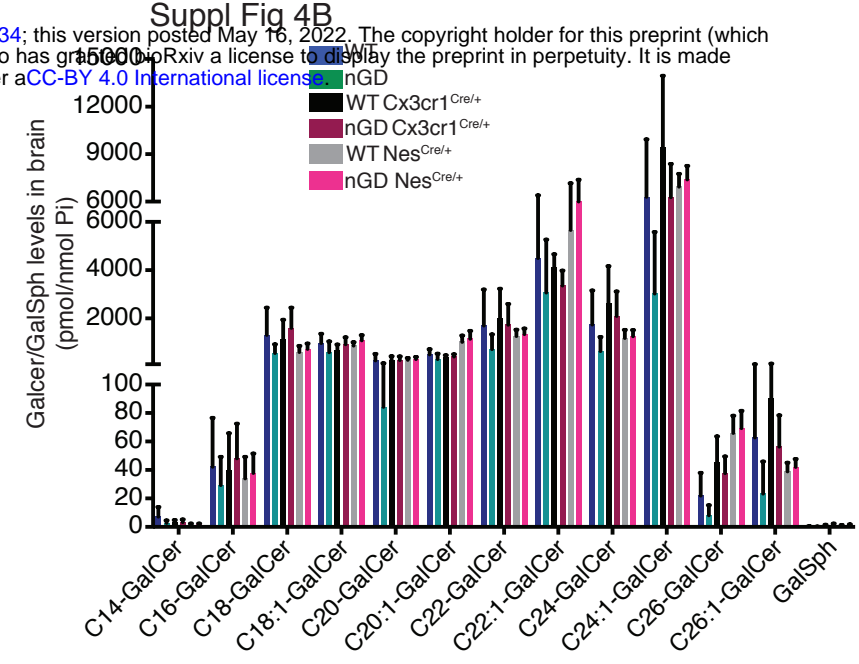

Suppl Fig 4C

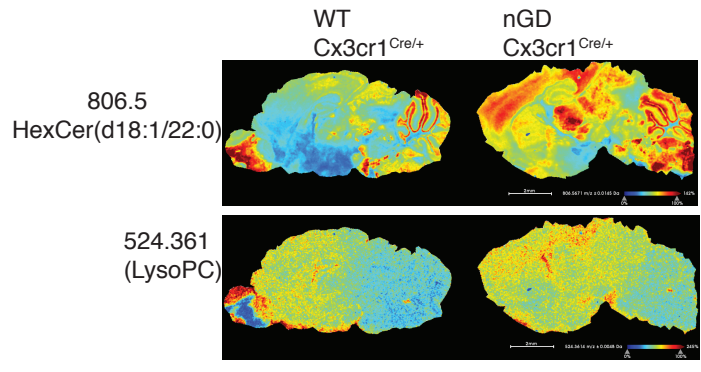

Suppl Fig 4D

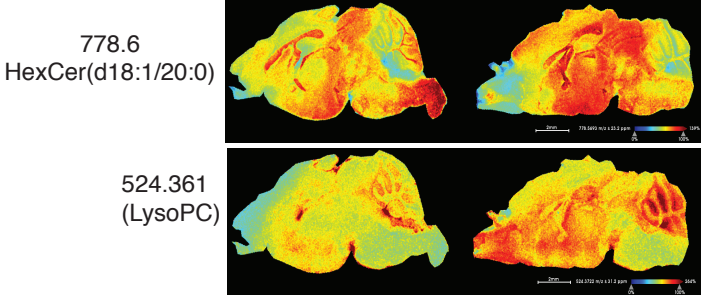

Suppl Fig 4E

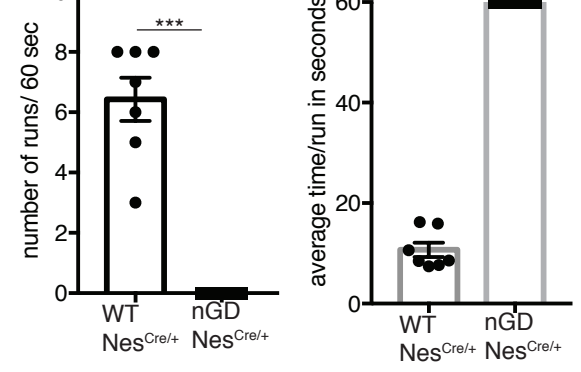

Suppl Fig 4F

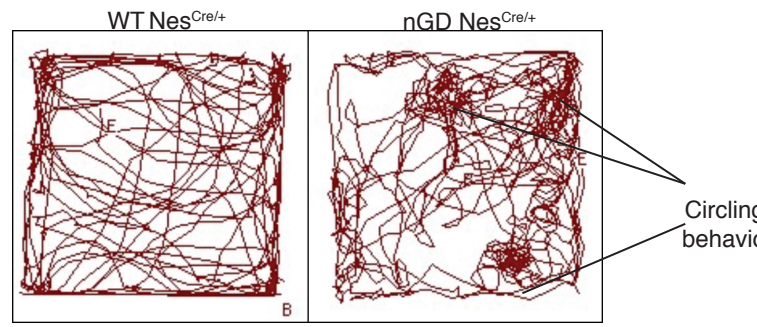

Figure S4. **Gba** deficiency in neurons aid in microglia activation and immune cell infiltration.

**A.** Fold change increase in different Glucosylceramide (GluCer) and glucosylsphingosine (GlcSph) species in nGD, nGD Cx3cr1<sup>Cre/+</sup> and nGD Nes<sup>Cre/+</sup> mice over respective control mice brain. **B.** Quantitative analysis of total GalCer species and GalSph levels by LC-ESI-MS/MS in nGD, nGD Cx3cr1<sup>Cre/+</sup> mice and nGD Nes<sup>Cre/+</sup> mice brain compared with the control mice (n=4-8 mice/group). **C.** Signal intensities of HexCer species (d18:1/20:0) and LysoPC identified by MALDI across nGD Cx3cr1<sup>Cre/+</sup> and control littermates **D.** and nGD Nes<sup>Cre/+</sup> mice and control mice. The color bars in MALDI images show signal intensity: blue to red indicates low to high levels. The data is representative of three independent experiments. **E.** nGD Nes<sup>Cre/+</sup> mice showed motor deficits in the balance beam test as compared to control mice. **F.** Representative track plots obtained from open-field studies show circling behavior in nGD Nes<sup>Cre/+</sup> mice.

Suppl Fig 5A

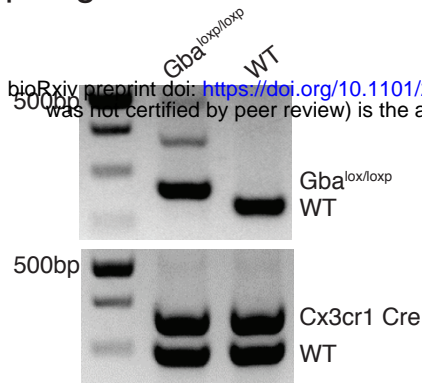

Suppl Fig 5B

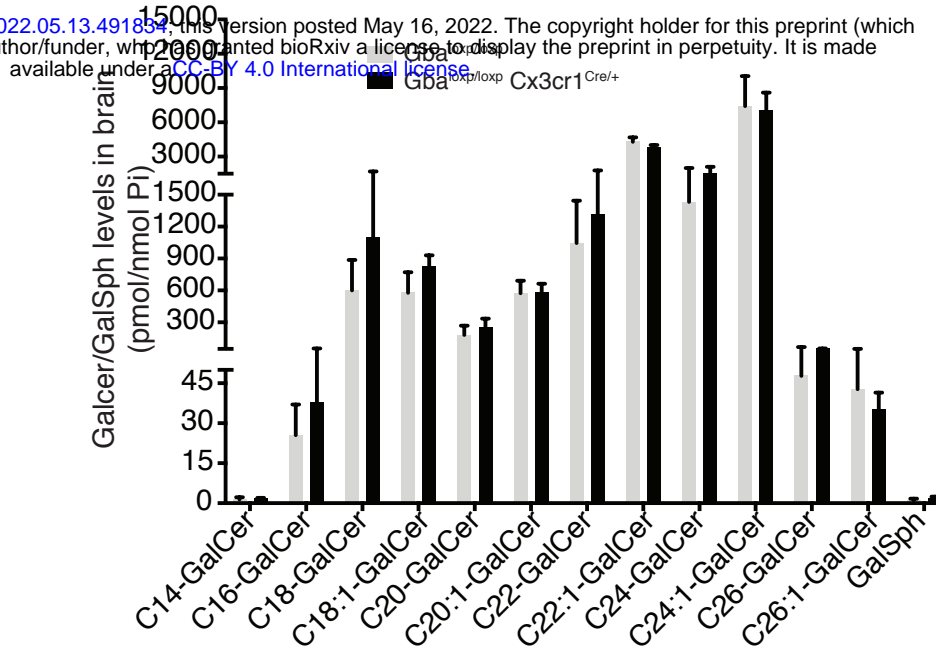

Fig 5C

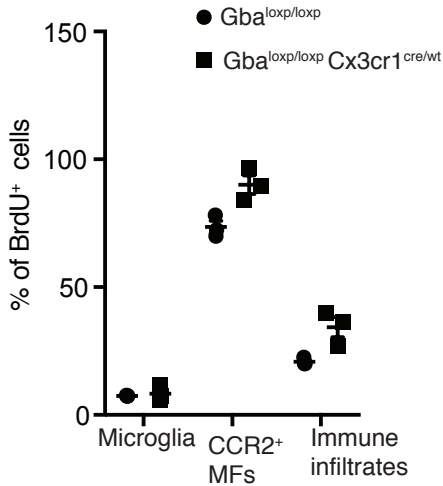

Fig 5E

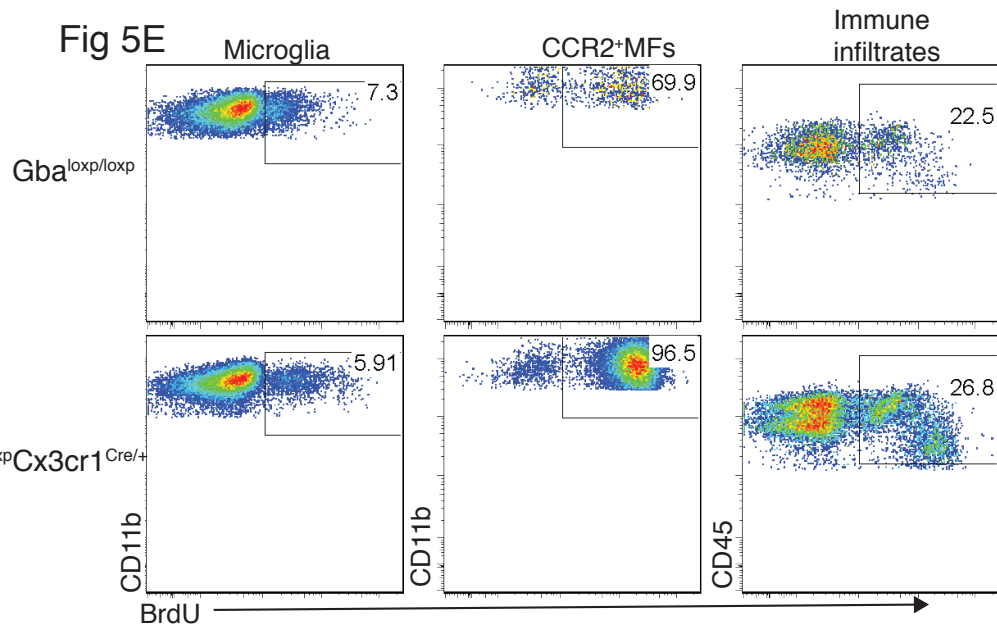

Fig 5D

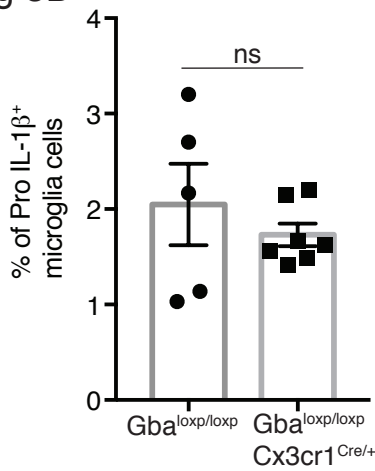

Figure S5. Changes in microglia subsets coupled with neurodegeneration is seen in aged *Gba<sup>loxp/loxp</sup> Cx3cr1<sup>Cre/+</sup>* mice brain.

A. Genotyping for *Cx3cr1 cre* and *loxp* alleles. B. Quantitative analysis of total GalCer species and GalSph levels by LC-ESI-MS/MS in *Gba<sup>loxp/loxp</sup> Cx3cr1<sup>Cre/+</sup>* mice brain compared with the control mice (n=4-8 mice/group). C. Comparison of percentage of BrdU+ microglia, CCR2+ MFs and immune infiltrates between *Gba<sup>loxp/loxp</sup> Cx3cr1<sup>Cre/wt</sup>* and control mice brain (n=3 mice/group) D. Representative histograms depicting BrdU incorporation in the microglia, CCR2+ MFs and immune infiltrates isolated from *Gba<sup>loxp/loxp</sup> Cx3cr1<sup>Cre/wt</sup>* and control mice brain. E. Percentage of Pro-IL-1β+ microglia cells in control and *Gba<sup>loxp/loxp</sup> Cx3cr1<sup>Cre/wt</sup>* mice (n=5-6 mice/group).

Suppl Fig 6A

Spleen

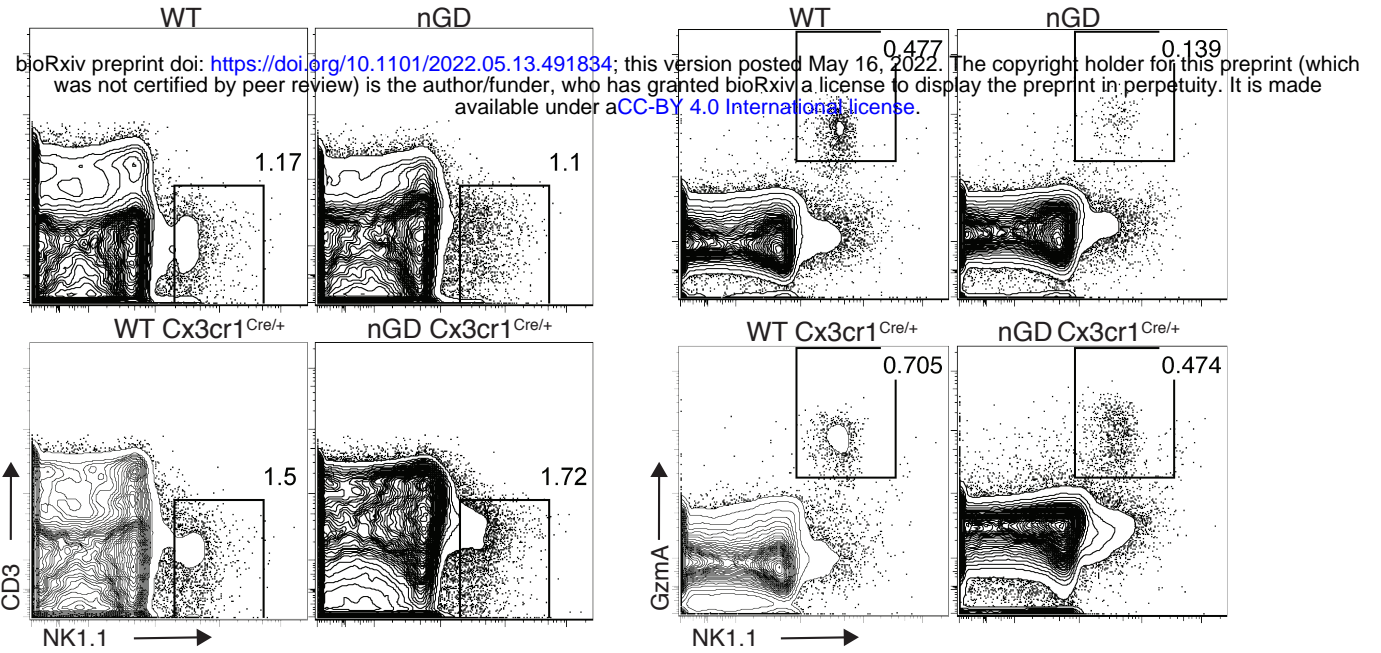

Suppl Fig 6B

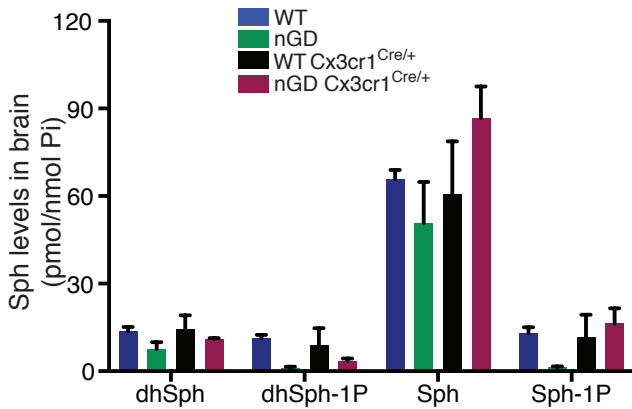

Suppl Fig 6C

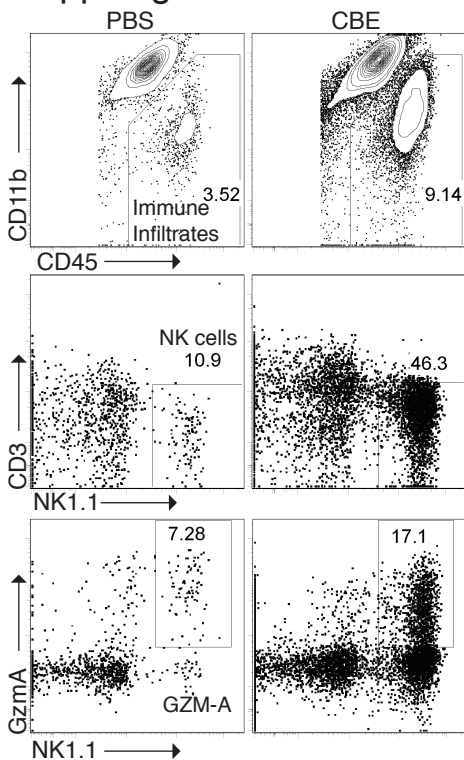

Figure S6. NK cell infiltration into the brain of nGD, nGD Cx3cr1Cre/+ mice. A. Representative FACS plot showing NK1.1+ NK cells and Gzm-A+ NK cells in the spleen of nGD, nGD Cx3cr1Cre/+ and control littermates. B. Lipidomic analysis by LC-MS/MS of Sphingosine-1-phosphate (S1P) and Sphingosine (Sph) content in brains from nGD, nGD Cx3cr1Cre/+ mice and control littermates. C. Representative FACS plot showing percentage of immune infiltrates (top panel), NK1.1+ NK cells (middle panel) and GzmA+ NK cells (bottom panel) in B6 treated with vehicle or CBE.

# Suppl Fig 7A

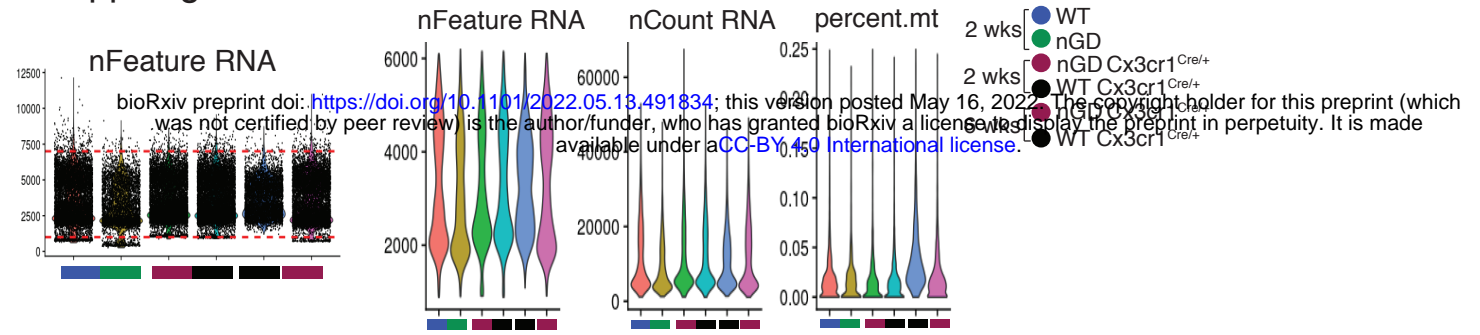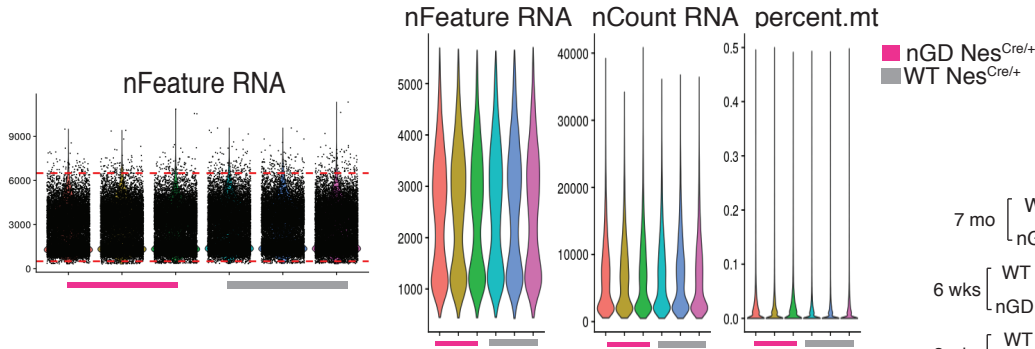

# Suppl Fig 7C

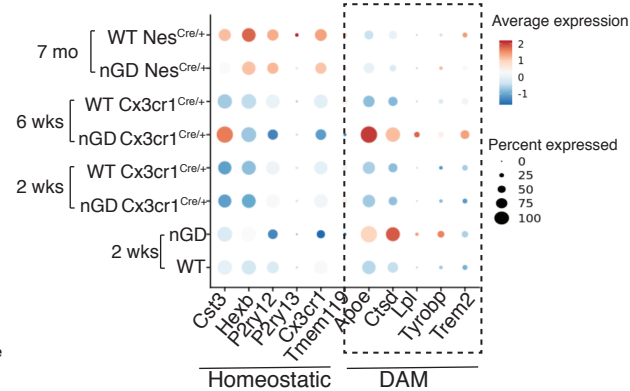

# Suppl Fig 7B

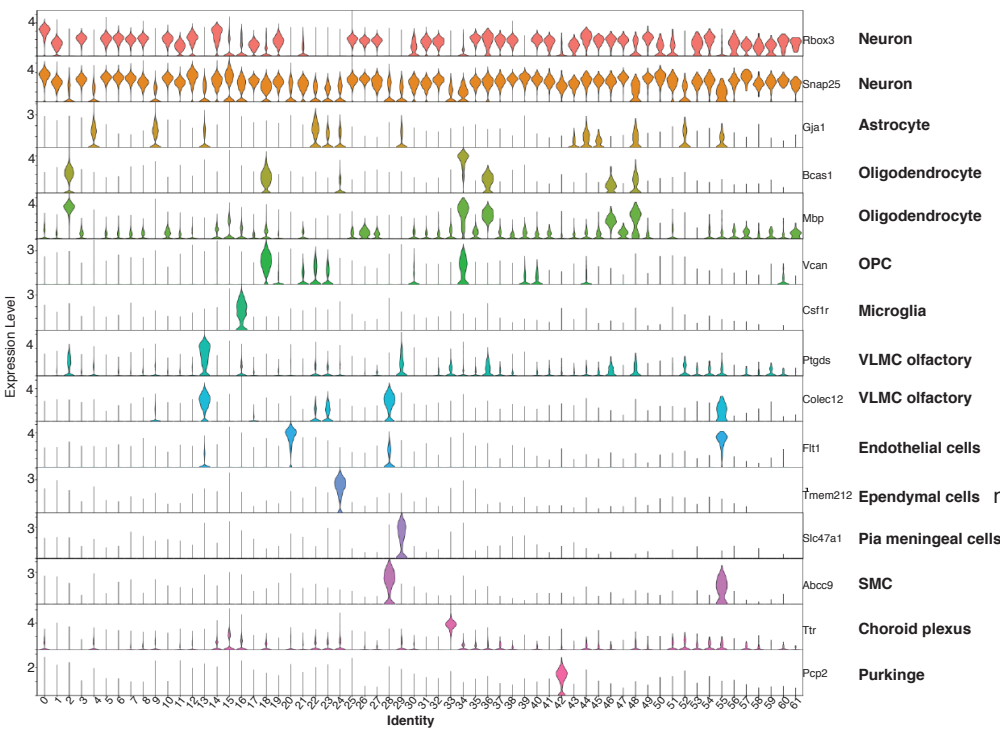

# Suppl Fig 7D

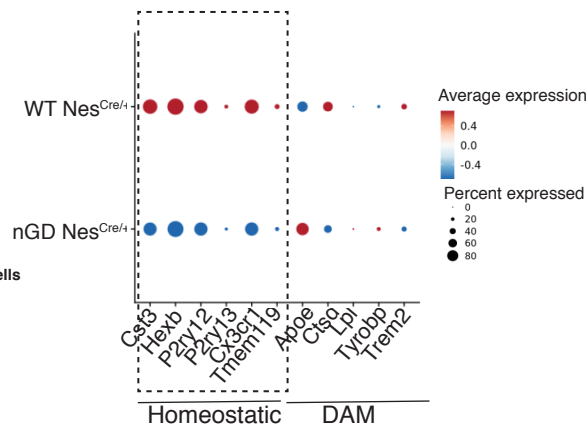

Figure S7. snRNA-seq analysis of the brain of nGD, nGD Cx3cr1<sup>Cre/+</sup> mice. A. Analysis on snRNA-seq data of nGD (green), Gbawt/lwt (blue), nGD Cx3cr1<sup>Cre/+</sup> 2 and 6 wks old (maroon), Gbawt/wt Cx3cr1<sup>Cre/+</sup> 2 and 6 wks old (black), nGD Nes<sup>Cre/+</sup> mice (pink) (n=3) and Gbawt/wt Nes<sup>Cre/+</sup> (grey) (n=3). Violin plots showing the total number of detected genes (nFeature), reads counts (nCount), proportion of mitochondria (percent.mt) contamination per nucleus for each sample. B. Violin plots showing the cluster-specific expression of the canonical marker genes across all clusters. C. Dot plot showing the differential expression of homeostatic and Disease associated microglial (DAM) genes (dotted box) in microglia from nGD, Gbawt/lwt, nGD Cx3cr1<sup>Cre/+</sup> 2 and 6 wks old, Gbawt/wt Cx3cr1<sup>Cre/+</sup> 2 and 6 wks old, nGD Nes<sup>Cre/+</sup> mice (n=3) and Gbawt/wt Nes<sup>Cre/+</sup> (n=3) respectively. D. Dot plot showing the differential expression of homeostatic (dotted box) and Disease associated microglial (DAM) genes in microglia from nGD Nes<sup>Cre/+</sup> mice (n=3) and Gbawt/wt Nes<sup>Cre/+</sup> (n=3) respectively.

# Suppl Fig 8 A

bioRxiv preprint doi: <https://doi.org/10.1101/2022.05.13.491804>; this version posted May 16, 2022. The copyright holder for this preprint (which was not certified by peer review) is the author/funder, who has granted bioRxiv a license to display the preprint in perpetuity. It is made available under aCC-BY 4.0 International license.

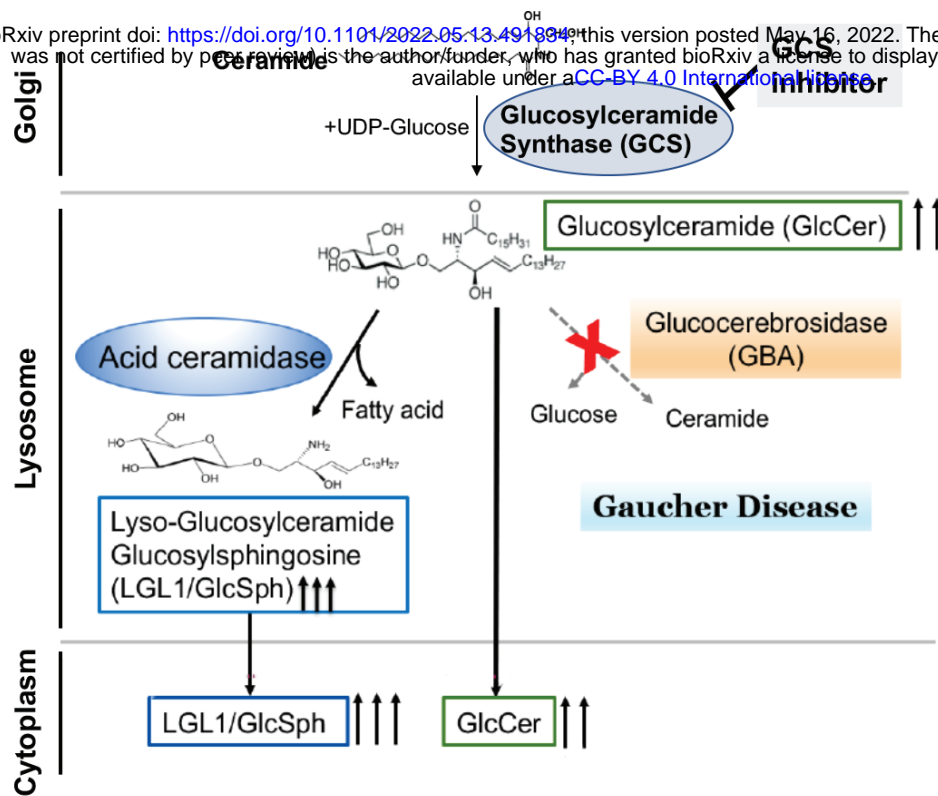

## Suppl Fig 8 B

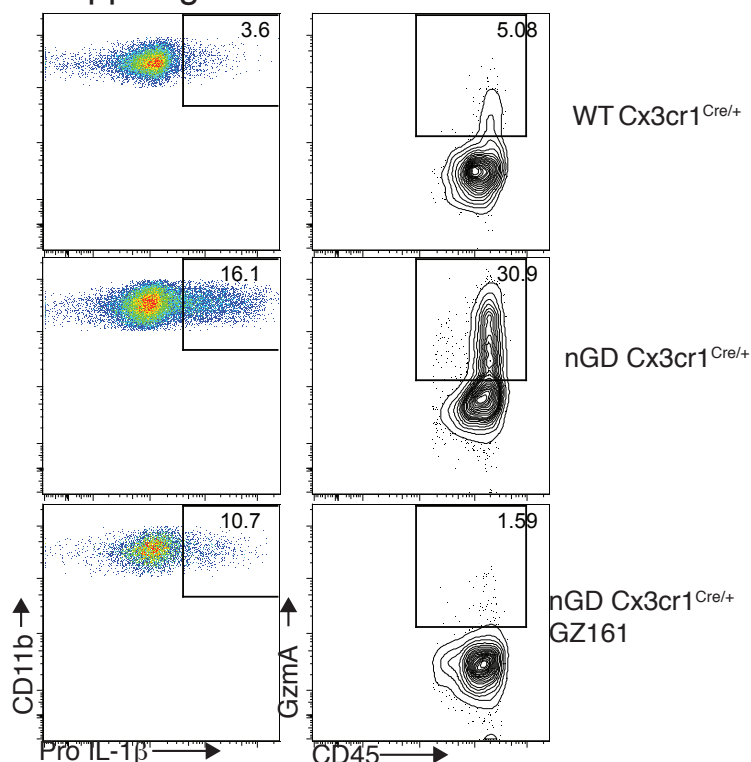

Figure S8. Immune regulatory effects of glucosyl ceramide synthetase (GCS) inhibitor GZ-161 on microglia and GzmA<sup>+</sup> cells. A. Schematic illustration of mode of action of GCS inhibitor. B. Representative FACS plot showing percentage of Pro-IL-1 $\beta$ <sup>+</sup> microglia cells (left) and GzmA<sup>+</sup> CD45<sup>+</sup> (right) in wild type and nGD Cx3cr1<sup>Cre/+</sup> mice with and without treatment with GZ-161.



Suppl Fig 9A

bioRxiv preprint doi: <https://doi.org/10.1101/2022.05.13.491834>; this version posted May 16, 2022. The copyright holder for this preprint (which was not certified by peer review) is the author/funder, who has granted bioRxiv a license to display the preprint in perpetuity. It is made available under aCC-BY 4.0 International license.

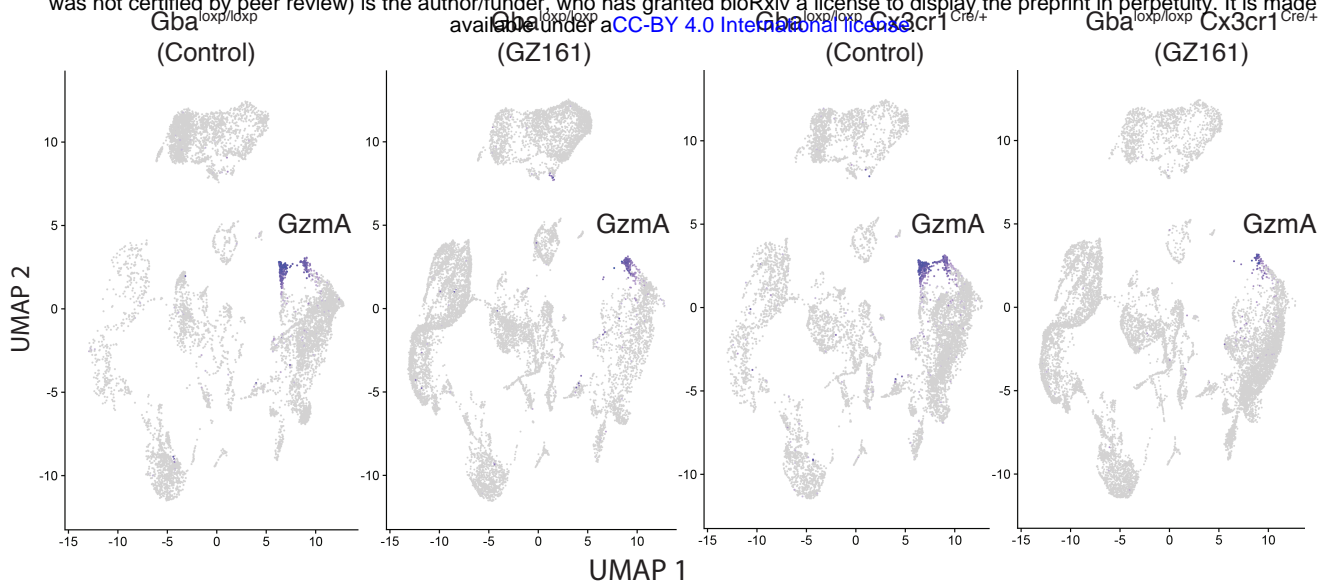

Suppl Fig 9B

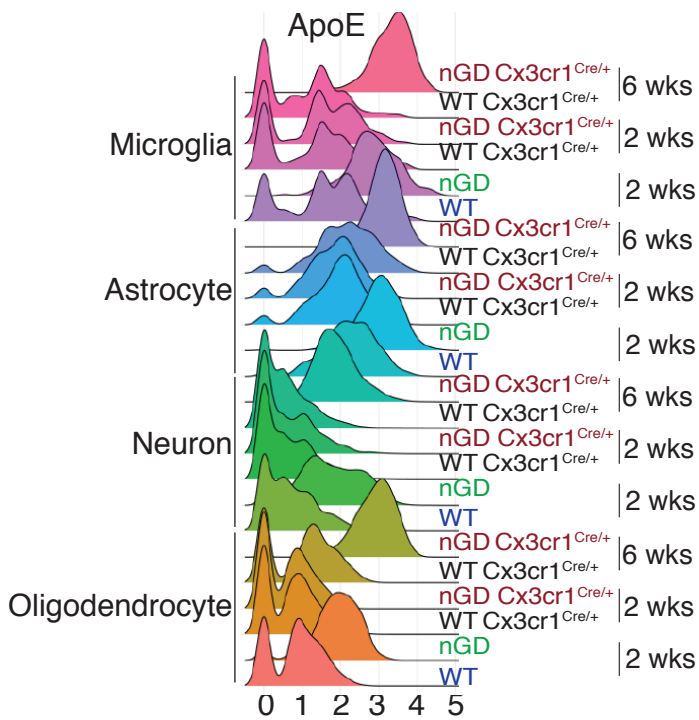

Suppl Fig 9C

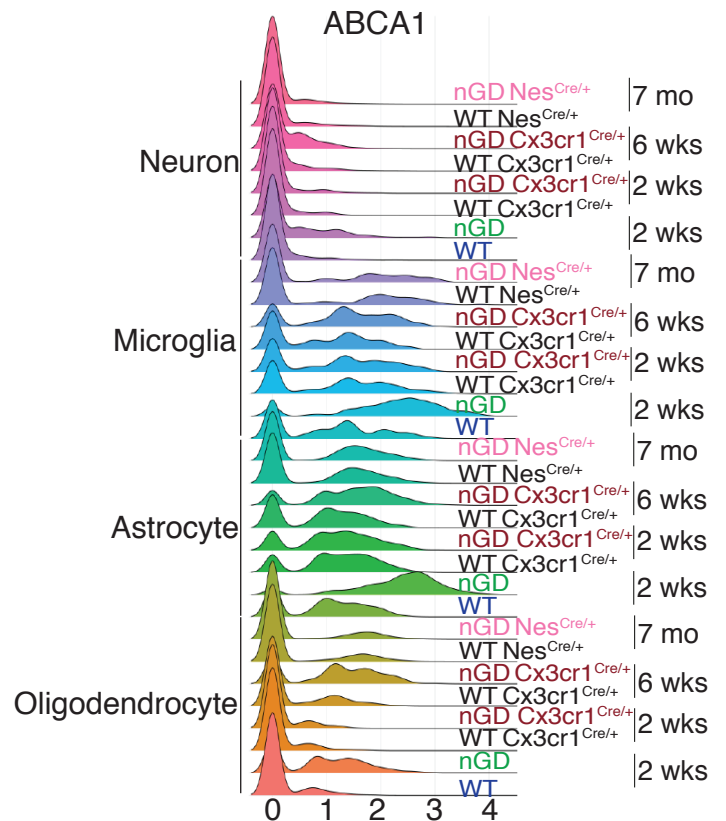

Figure S9. Long term treatment with GCS inhibitor, GZ-161, counteracts GluCer accumulation, improves microglial homeostasis, abrogates NK cell activation in Gba deficient microglia. A. UMAP showing Gzma expression in the clusters from control and Gbaloxp/loxp Cx3cr1Cre/wt mice treated with either vehicle or GZ161. B. Histogram showing differential expression of ApoE in microglia, astrocyte, neuron and oligodendrocyte cluster from nGD (2 wk. old), nGD Cx3cr1Cre/+ (2 and 6 wk. old respectively), and corresponding control mice. C. Histogram showing expression of Abca1 in oligodendrocyte, microglia, astrocyte and neuron from nGD (2 wk old), nGD Cx3cr1Cre/+ (2 and 6 wk old respectively), nGD NesCre/+ and corresponding control mice.

Patients with confirmed diagnosis of Gaucher disease (n=410)

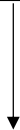

Pre and post treatment sample available with written consent (n=83)

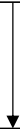

Eligible Patients (n=83)

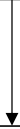

Study cohort or biomarkers (n=83)
